# Supplementary material for: Longitudinal high-dimensional analysis identifies immune features associating with response to anti-PD-1 immunotherapy
Source: Springer Nature journal article supplement (doi:10.1038/s41467-023-40631-0), 2023-08-22
Supplement: MOESM1 [file 41467_2023_40631_MOESM1_ESM.pdf]

# **Supplementary information**

## **Longitudinal high-dimensional analysis identifies immune features associating with response to anti-PD-1 immunotherapy**

Elaine Lai-Han Leung, Run-Ze Li, Xing-Xing Fan,  
Lily Yan Wang, Yan Wang, Zebo Jiang, Jumin  
Huang, Hu-Dan Pan, Yue Fan, Hongmei Xu, Feng  
Wang, Haopeng Rui, Piu Wong, Hermi Sumatoh,  
Michael Fehlings, Alessandra Nardin, Paul Gavine,  
Longen Zhou, Yabing Cao and Liang Liu

Supplementary data  
&  
Supplementary methods

# Supplementary data

a

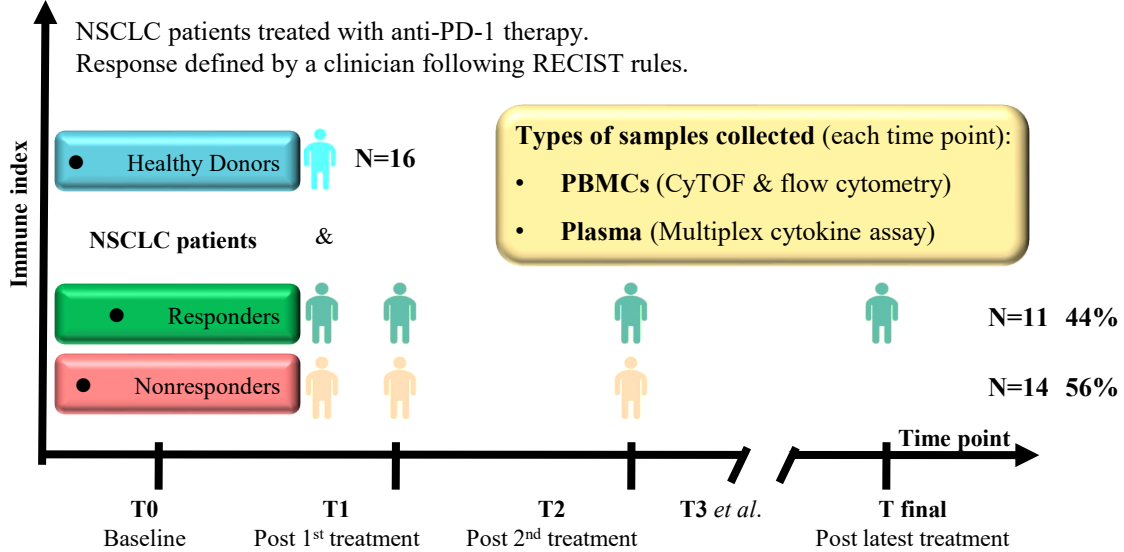

b

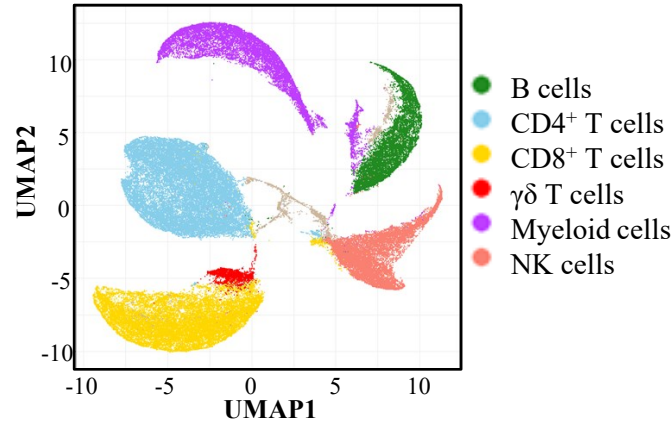

c

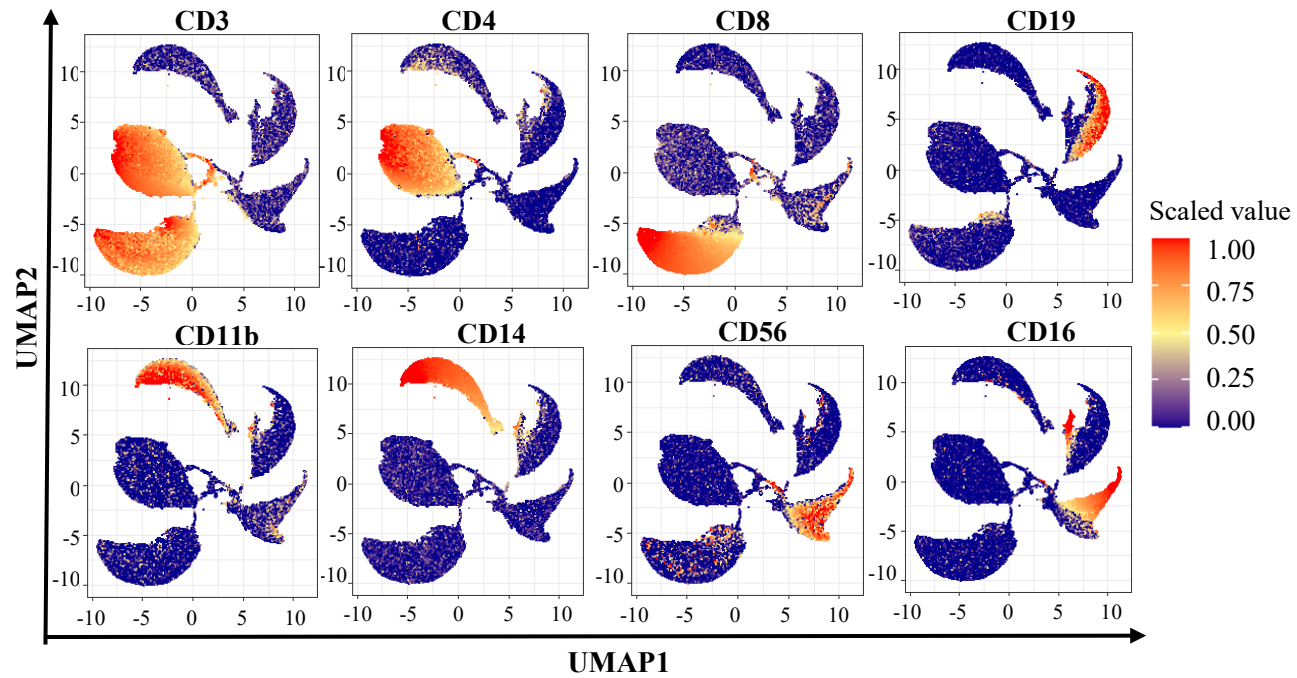

**Supplementary figure 1. High-dimensional single-cell analysis of PBMCs from NSCLC patients identifies immunophenotypes.** a. Illustration of the study design. The analysis was performed on PBMCs from healthy donors (n=20) and NSCLC patients (total patient number=25, responder number=11, nonresponder number=14). b. Manual clustering for major immune cell types. Cells were colored according to the cluster they were assigned to using the FlowSOM algorithm and manual annotation. c. Bioinformatic analysis of phenotypic profiling by UMAP dimension reduction and clustering algorithms (colored by sample features).

# Supplementary data

## CT scan

Before immunotherapy

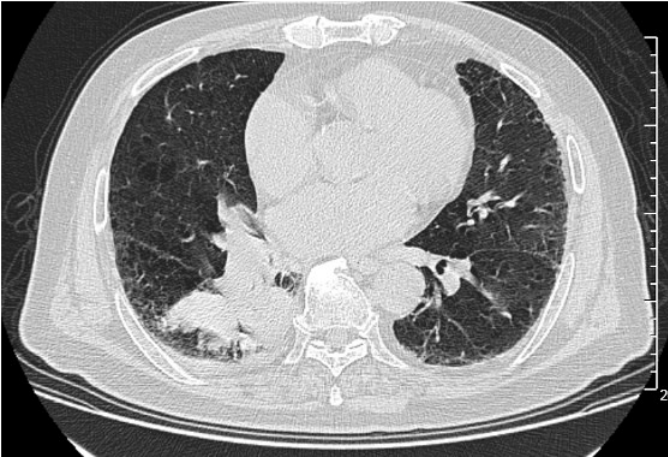

After immunotherapy

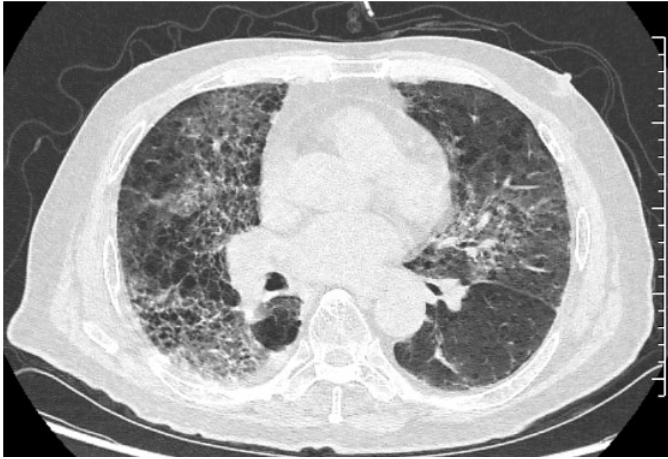

**Supplementary figure 2. Representative patient CT scans.** CT scan comparison for an 83-year-old patient with lung cancer before and after immunotherapy. Immune-related pneumonitis was also identified. Below, representative IHC images.

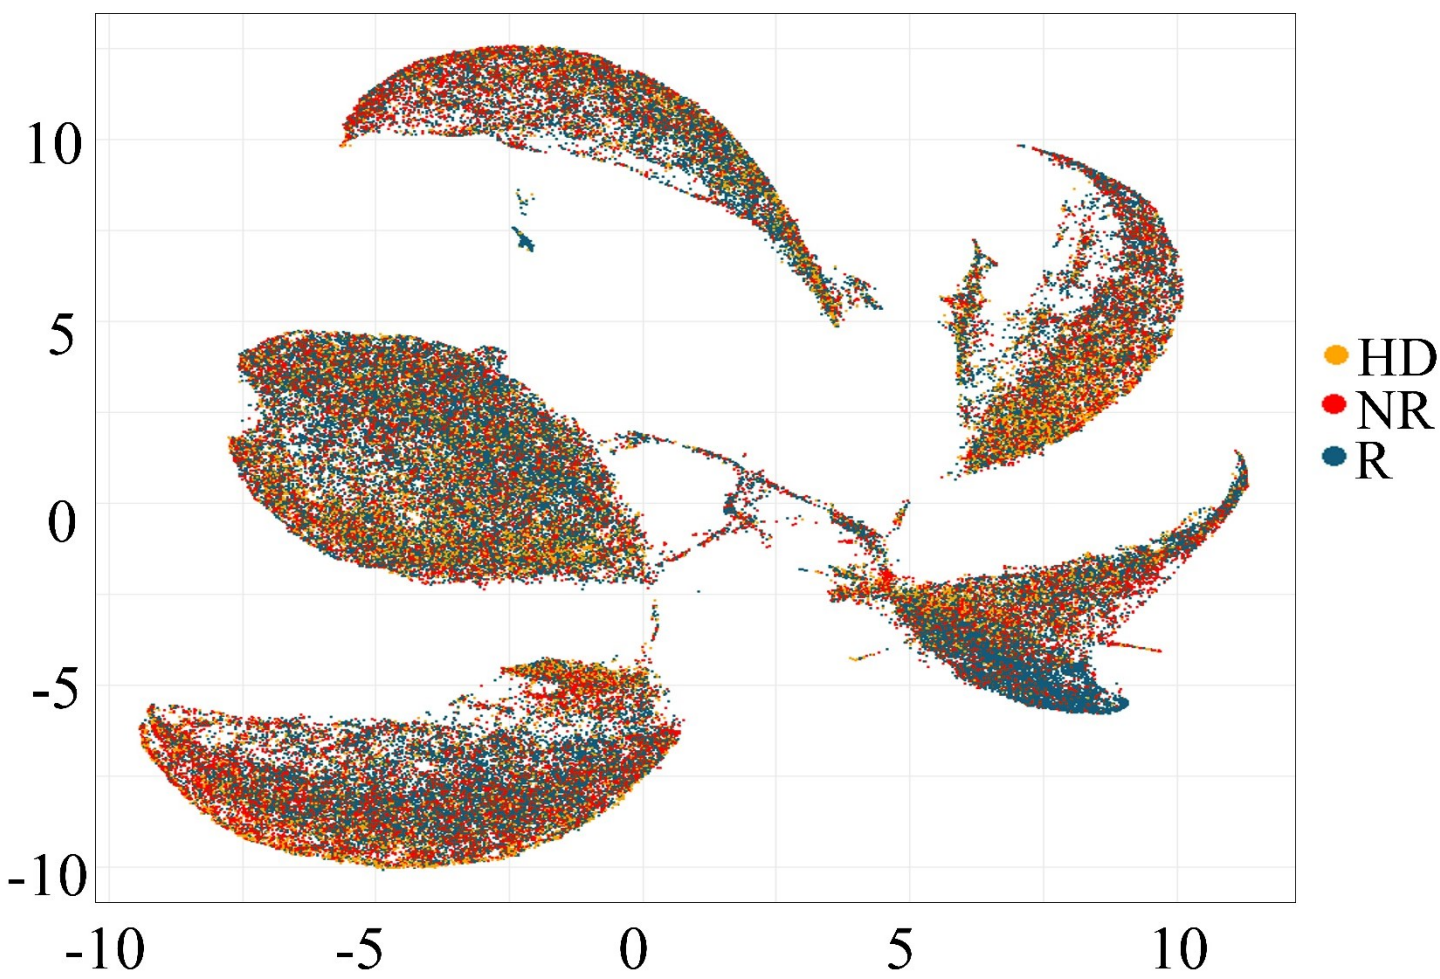

**Supplementary figure 3. Exemplified UMAP visualization for healthy donors, responders and nonresponders.** HD, healthy donors. NR, nonresponders. R, responders.



Supplementary data

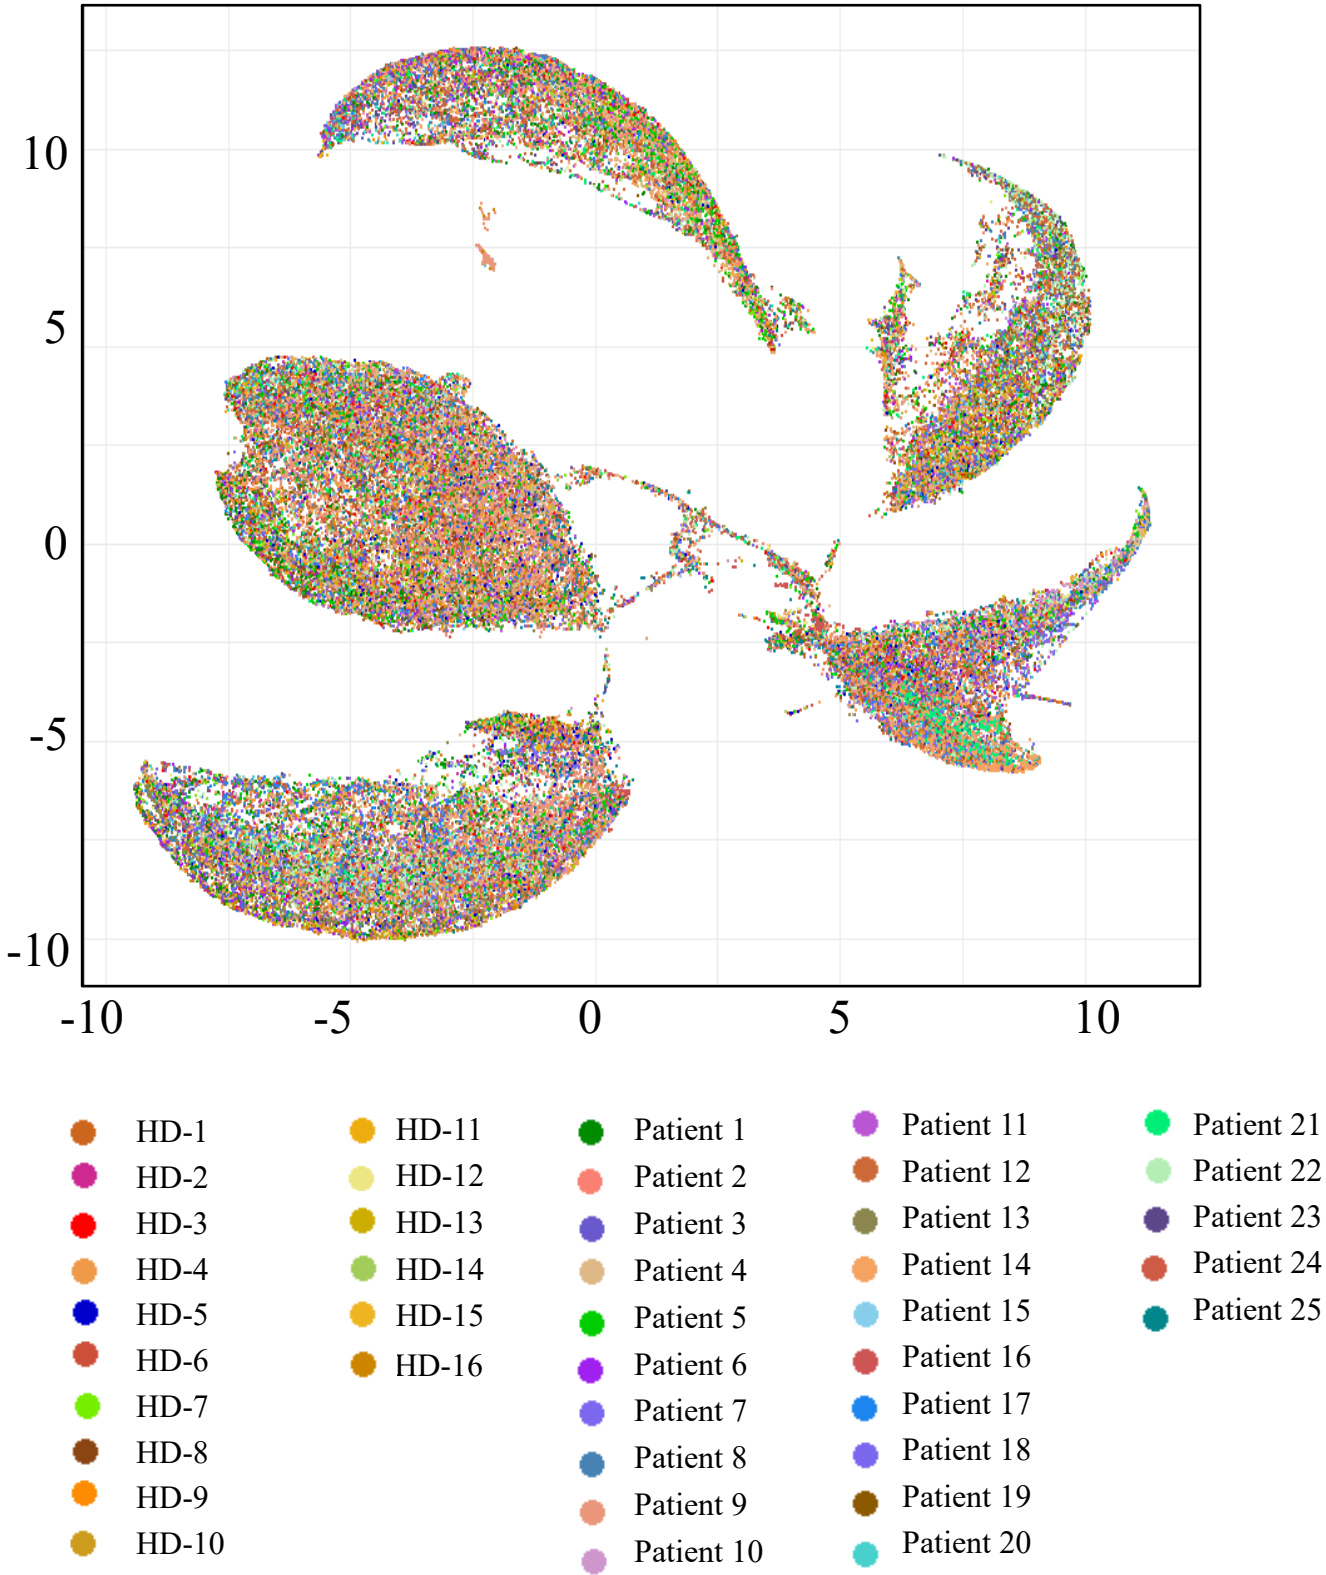

Supplementary figure 4. Exemplified UMAP visualization for different patients.

# Supplementary data

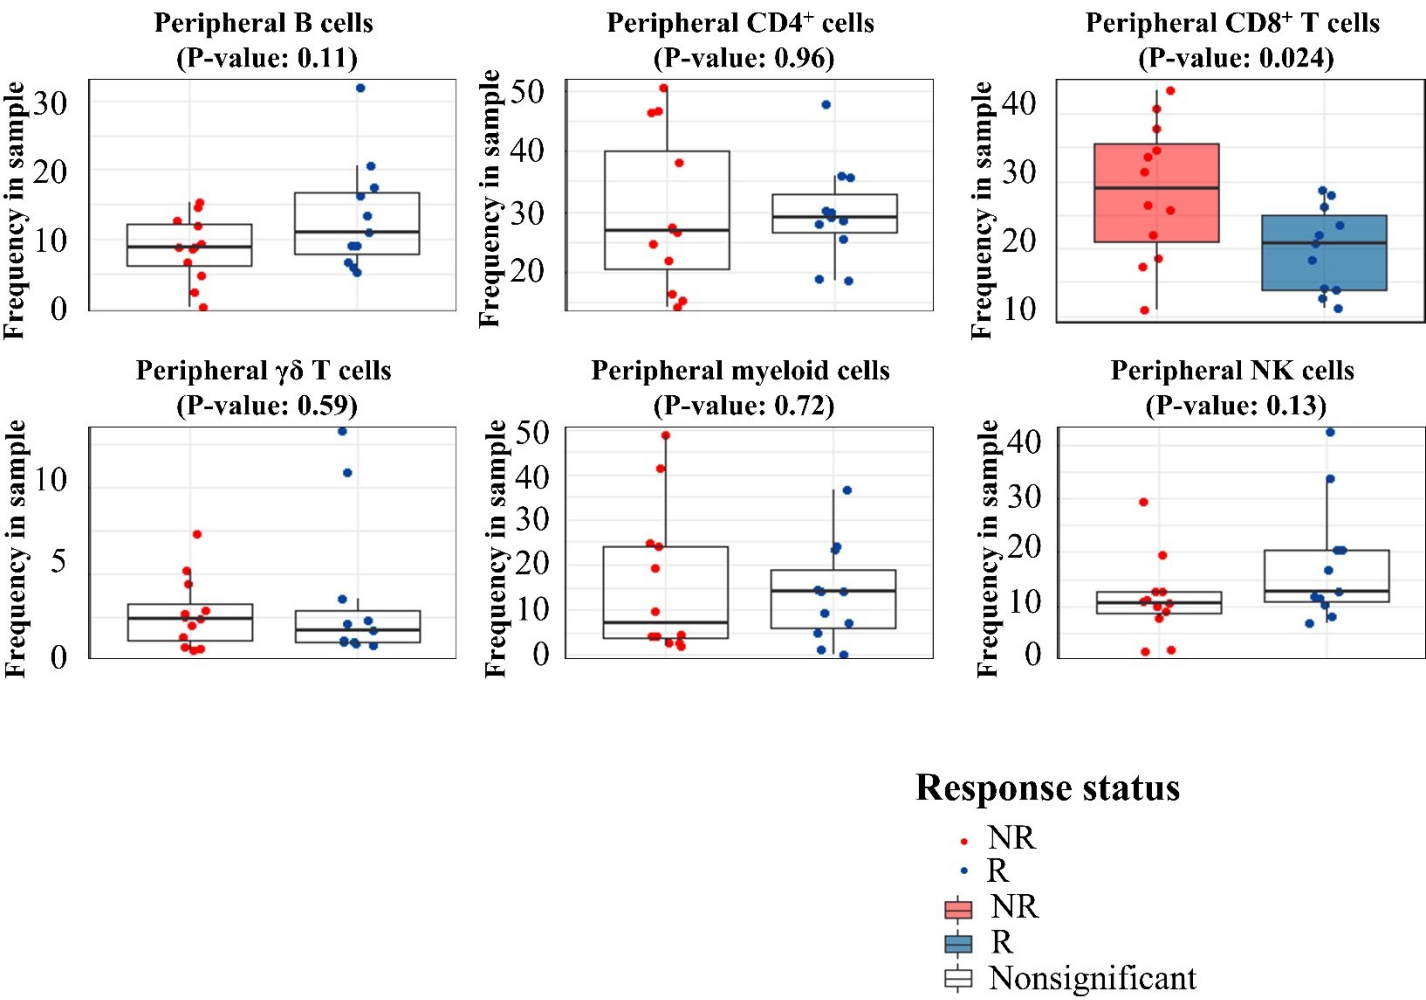

**Supplementary figure 5. Overview of the main types of immune cells in responders (n=11) and nonresponders (n=14) evaluated by a physician after receipt of anti-PD-1 immunotherapy.** The box plots represent the interquartile range (IQR), with the horizontal line indicating the median. The whiskers extend to the farthest data point within a maximum of  $1.5 \times \text{IQR}$ . All *p-values* were calculated using two-sided t-tests and were corrected for multiple comparisons using the Benjamini-Hochberg adjustment.

# Supplementary data

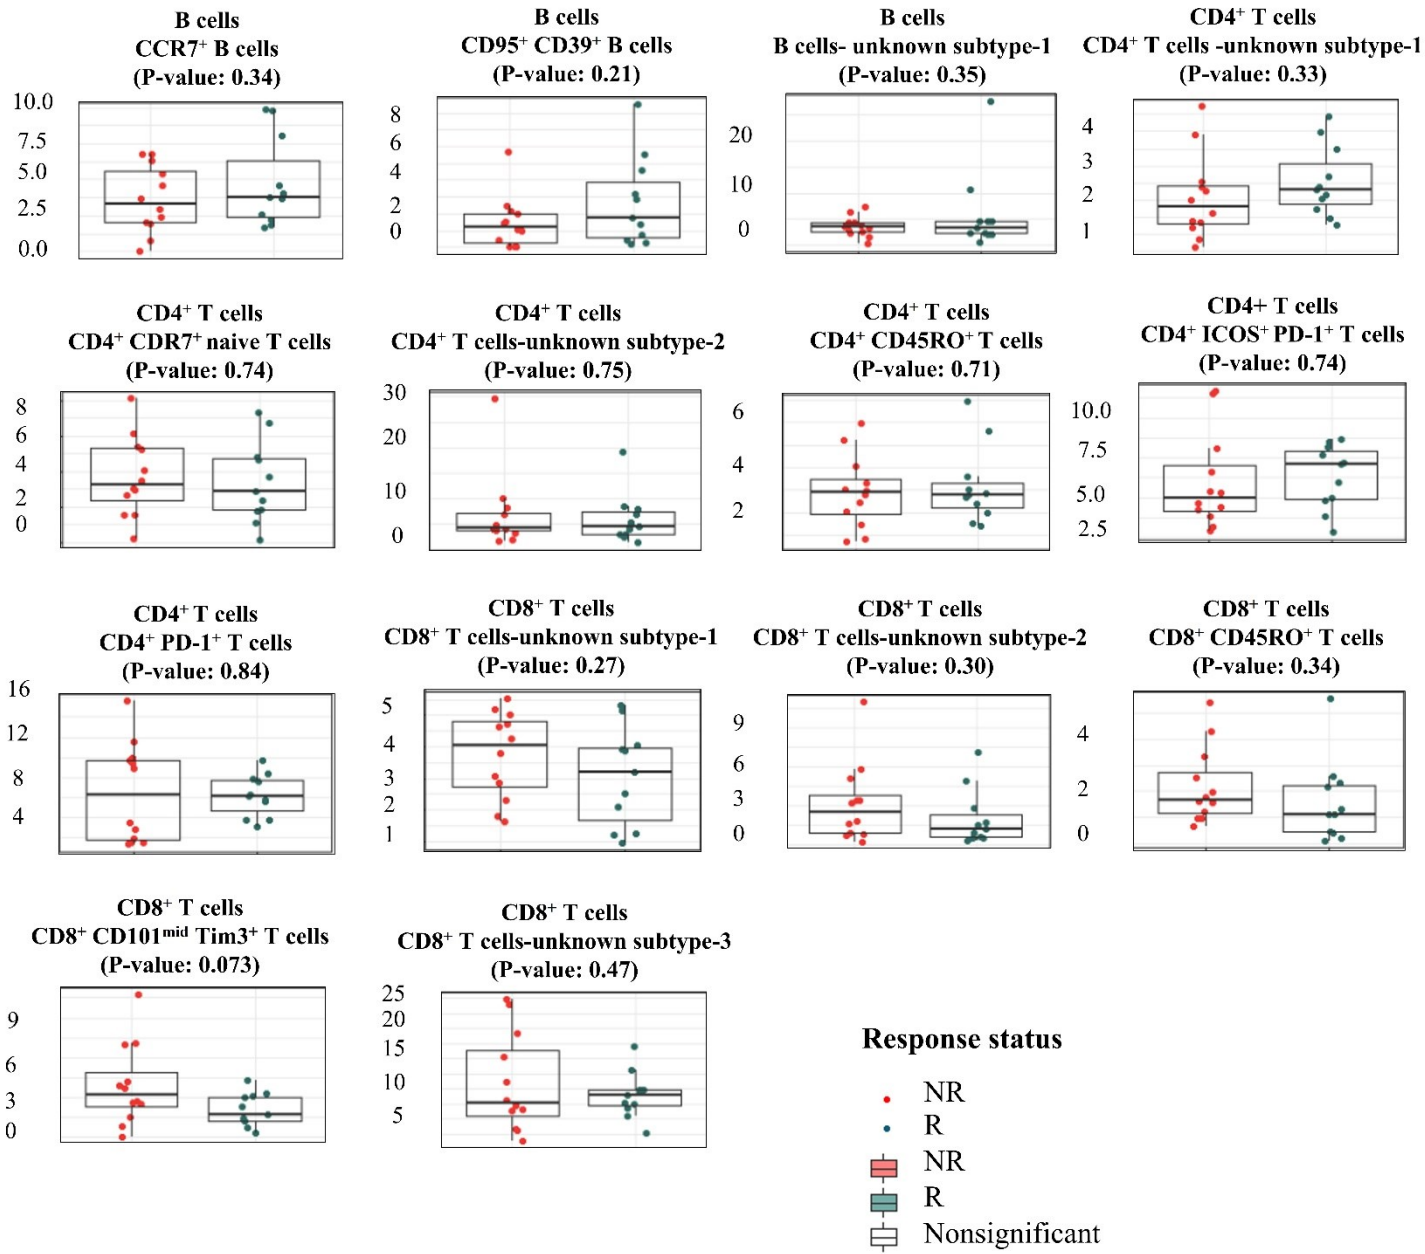

**Supplementary figure 6-1. Overview of subsets of immune cells in responders (n=11) and non-responders (n=14).** The box plots represent the interquartile range (IQR), with the horizontal line indicating the median. The whiskers extend to the farthest data point within a maximum of  $1.5 \times$  IQR. All *p-values* were calculated using two-sided t-tests comparing the R to the NR and were corrected for multiple comparisons using the Benjamini-Hochberg adjustment. For each unknown subset, a unique ID 1,2,3,4 were added for differentiation, which were consistent to all subsequent data.

# Supplementary data

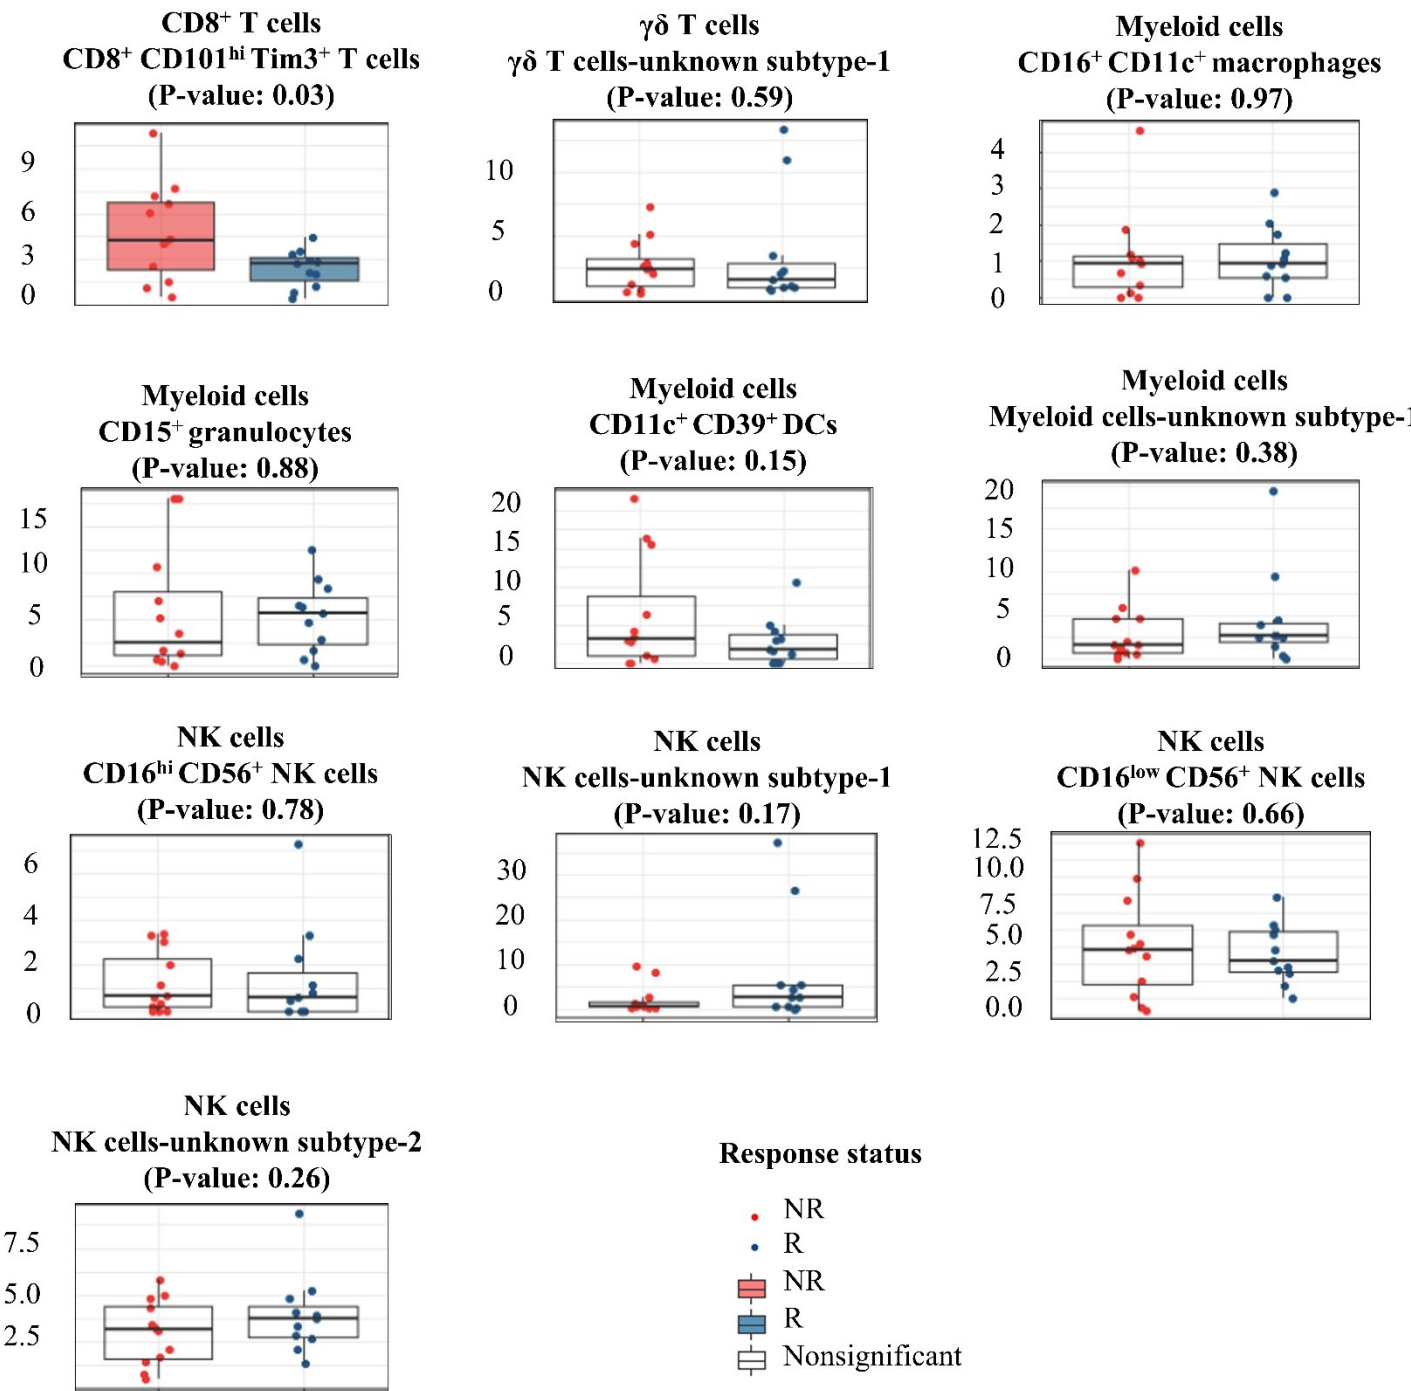

**Supplementary figure 6-2. Overview of subsets of immune cells in responders (n=11) and non-responders (n=14).** The box plots represent the interquartile range (IQR), with the horizontal line indicating the median. The whiskers extend to the farthest data point within a maximum of  $1.5 \times$  IQR. All *p-values* were calculated using two-sided t-tests comparing the R to the NR and were corrected for multiple comparisons using the Benjamini-Hochberg adjustment.

# Supplementary data

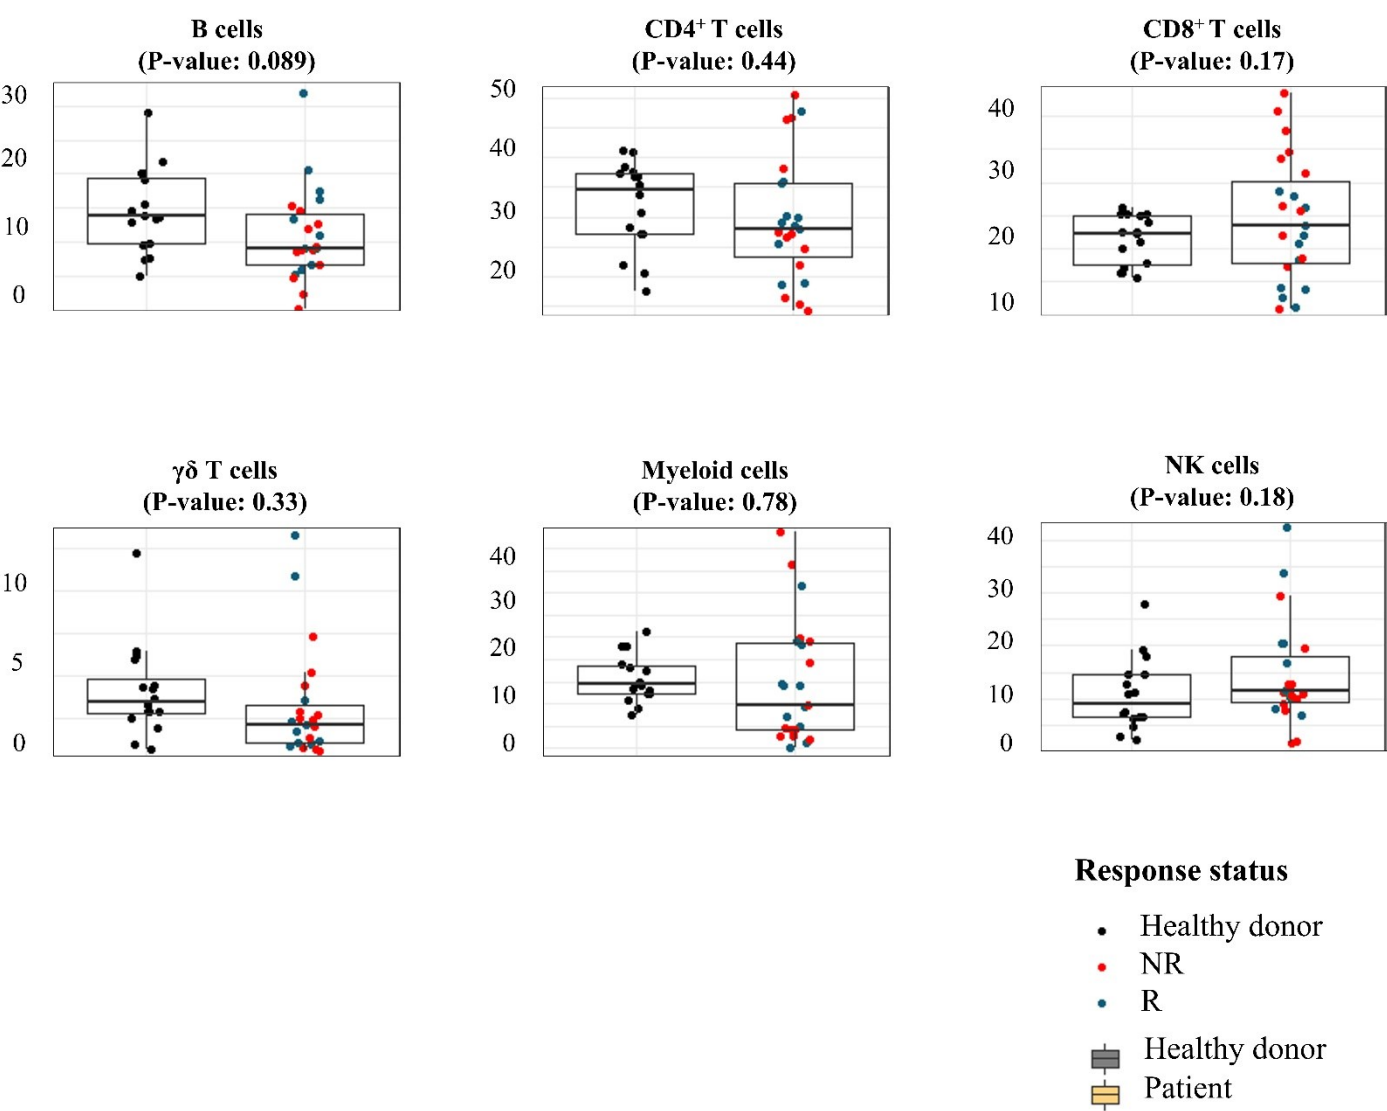

**Supplementary figure 7-1. The comparison of patients (n=25) and healthy donors (n=16) (at baseline) by Major type and subsets of immune cells.** The box plots represent the interquartile range (IQR), with the horizontal line indicating the median. The whiskers extend to the farthest data point within a maximum of  $1.5 \times \text{IQR}$ . All *p-values* were calculated using two-sided t-tests comparing the patients to the HDs and were corrected for multiple comparisons using the Benjamini-Hochberg adjustment.



# Supplementary data

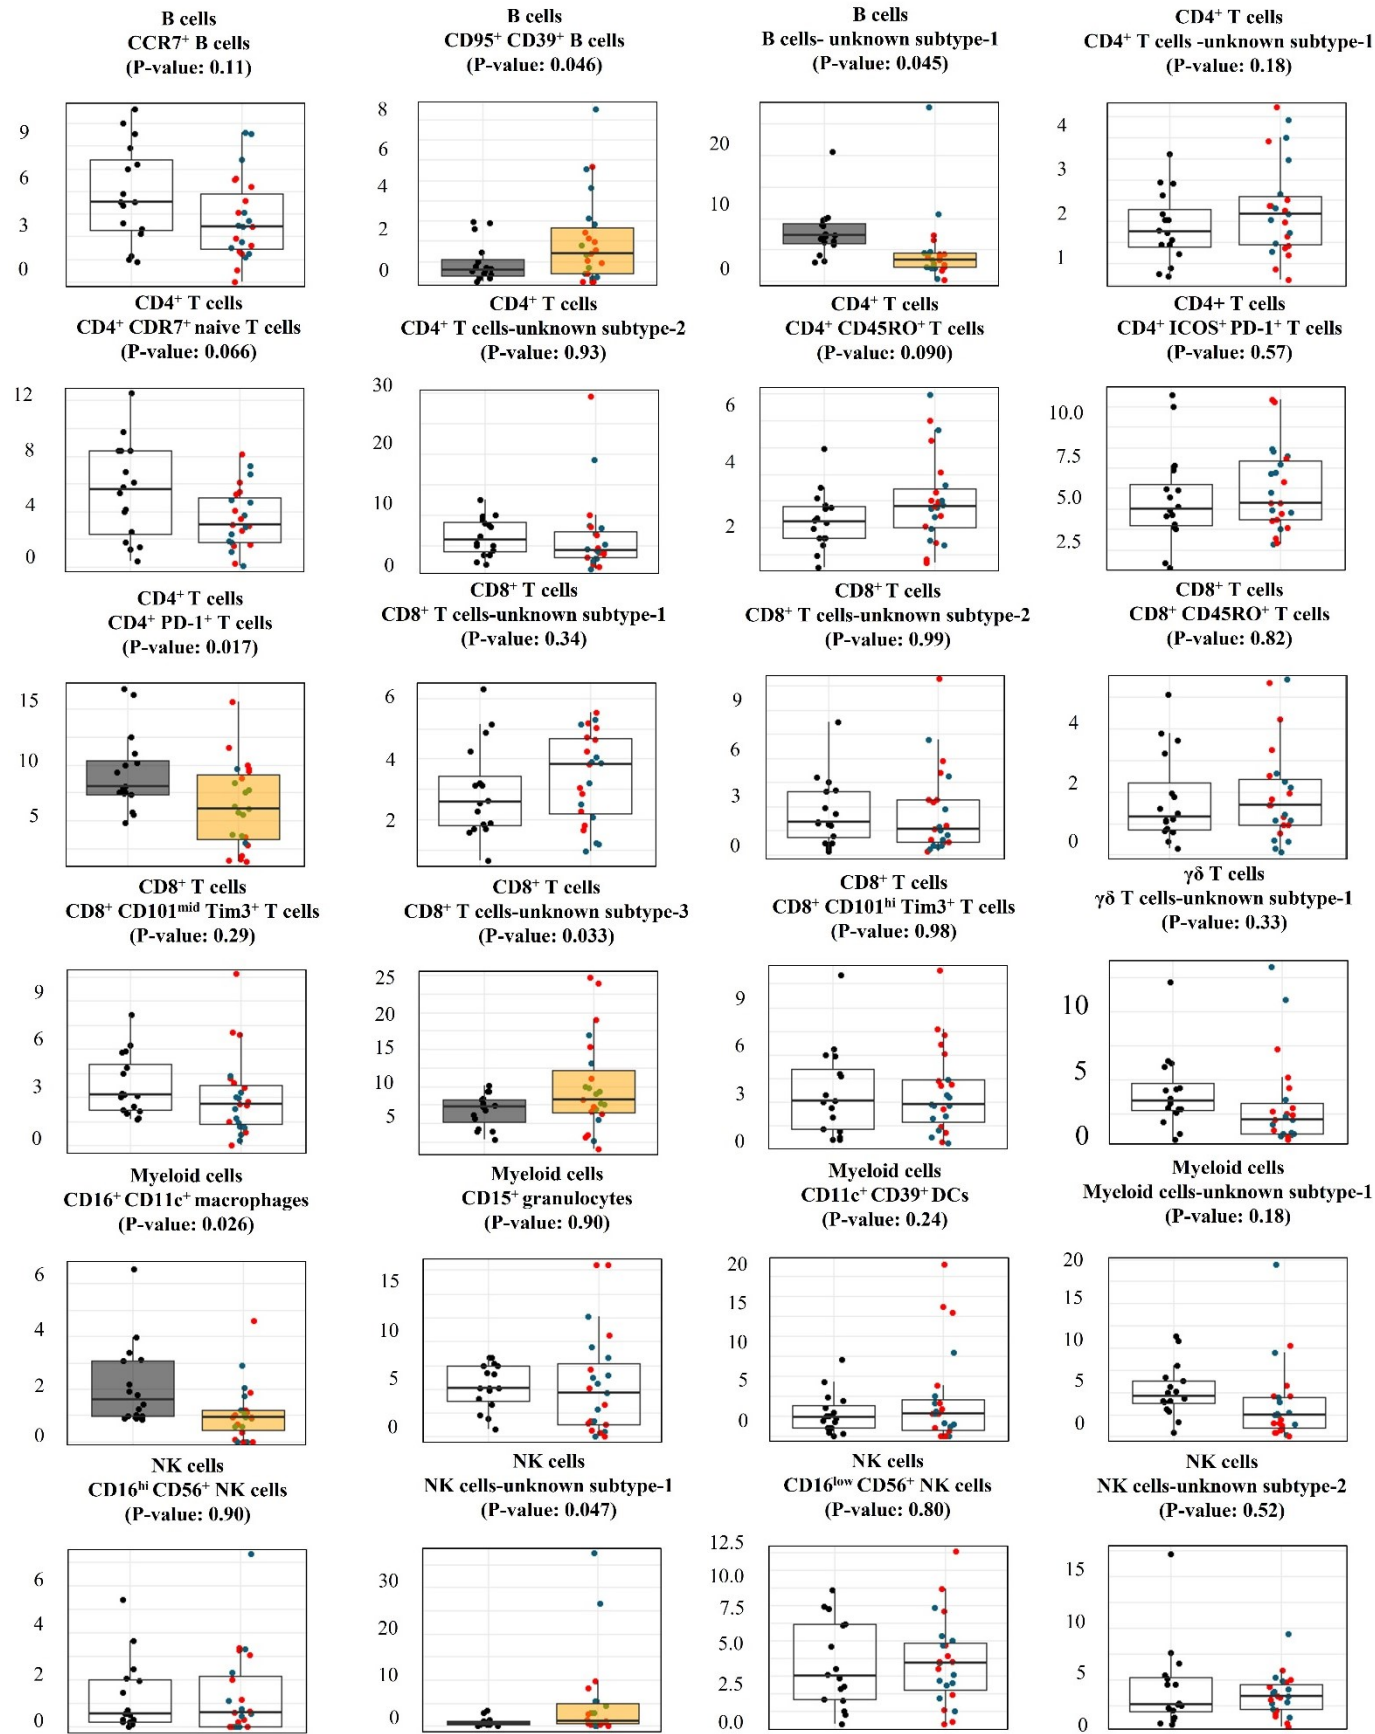

**Supplementary figure 7-2. The comparison of patients (n=25) and healthy donors (n=16) (at baseline) by Major type and subsets of immune cells with a p-value < 0.05.** The box plots represent the interquartile range (IQR), with the horizontal line indicating the median. The whiskers extend to the farthest data point within a maximum of  $1.5 \times \text{IQR}$ . All *p*-values were calculated using two-sided t-tests comparing the patients to the HDs and were corrected for multiple comparisons using the Benjamini-Hochberg adjustment.

## Response status

- Healthy donor
- NR
- R
- Healthy donor
- Patient

# Supplementary data

## Normalized expression of CD101 in major immune cell populations between R and NR

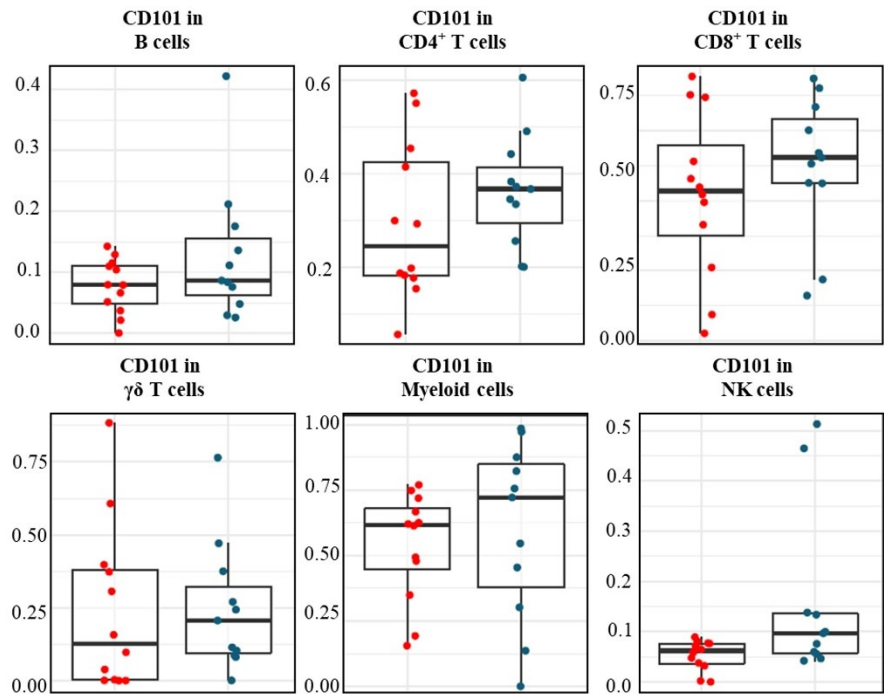

## Normalized expression of TIM3 in major immune cell populations between R and NR

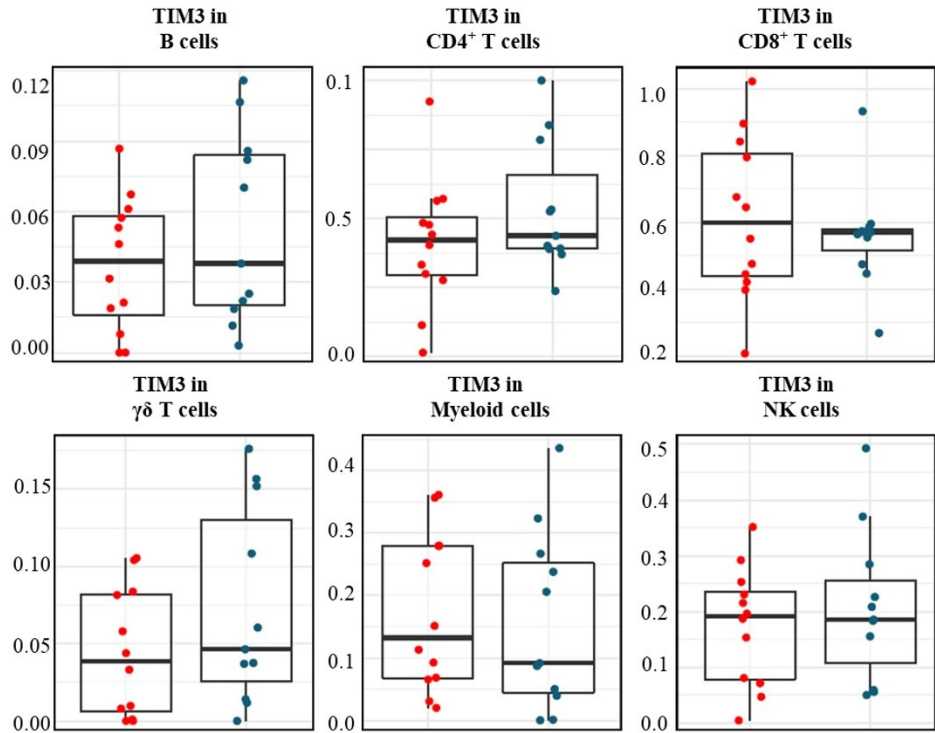

**Supplementary figure 8. Relative distributions of CD101 and TIM3 expression in different major immune cell populations of responders (n=11) and non-responders (n=14).** The box plots represent the interquartile range (IQR), with the horizontal line indicating the median. The whiskers extend to the farthest data point within a maximum of  $1.5 \times \text{IQR}$ .



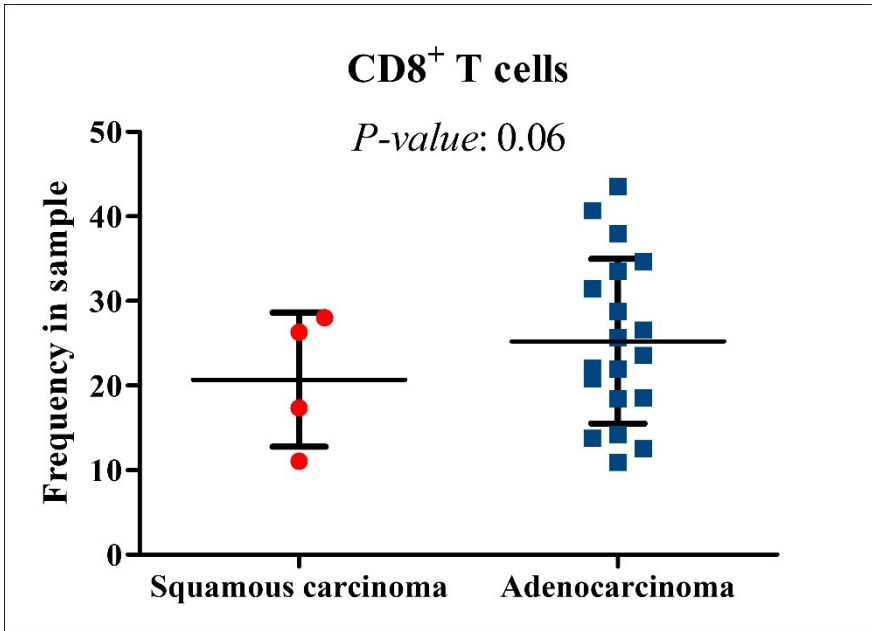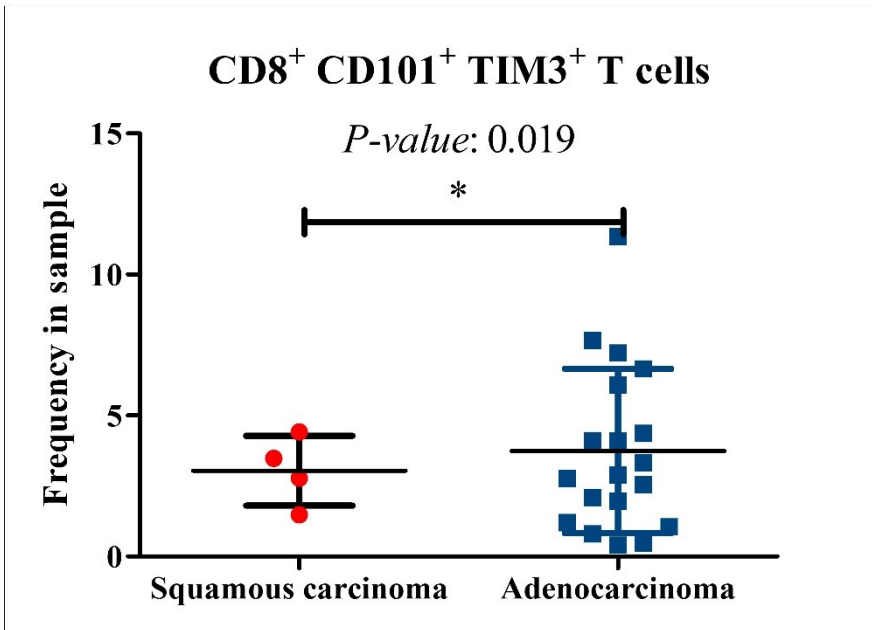

**Supplementary figure 9. The comparison of frequency of CD8<sup>+</sup> T cells and CCT cells by the different histological sub-types of NSCLC in responders (n=11) and non-responders (n=14).** Data are presented as mean values +/- SD. All *p-values* were calculated using two-sided t-tests comparing the patients to the HD and were corrected for multiple comparisons using the Benjamini-Hochberg adjustment

# Supplementary data

## Normalized expression of PD-1 in major immune cell populations between R and NR

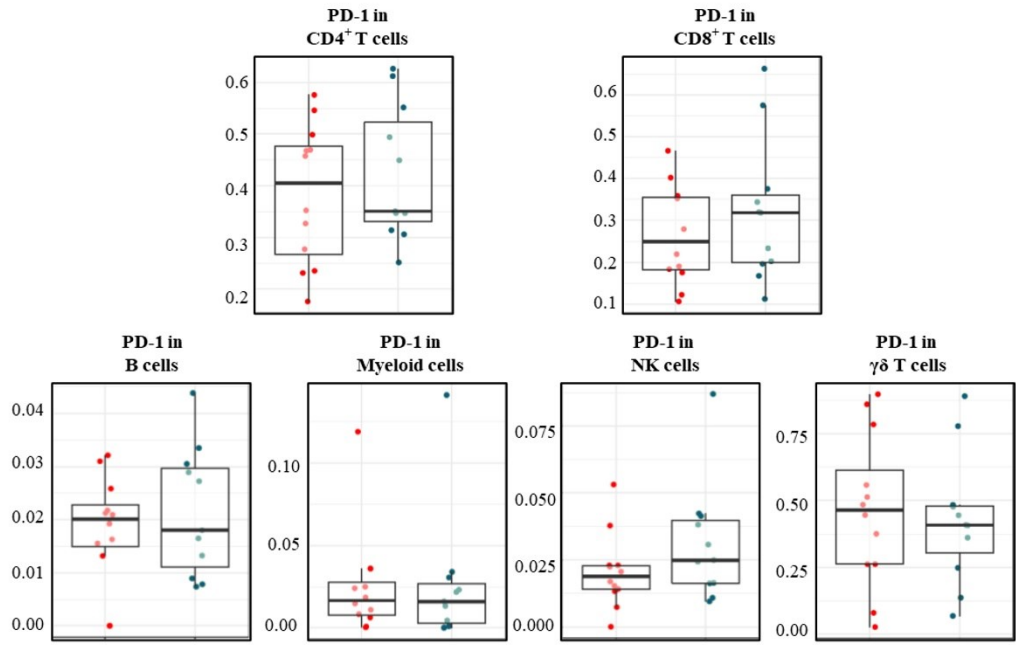

## Normalized expression PD-1 in subsets

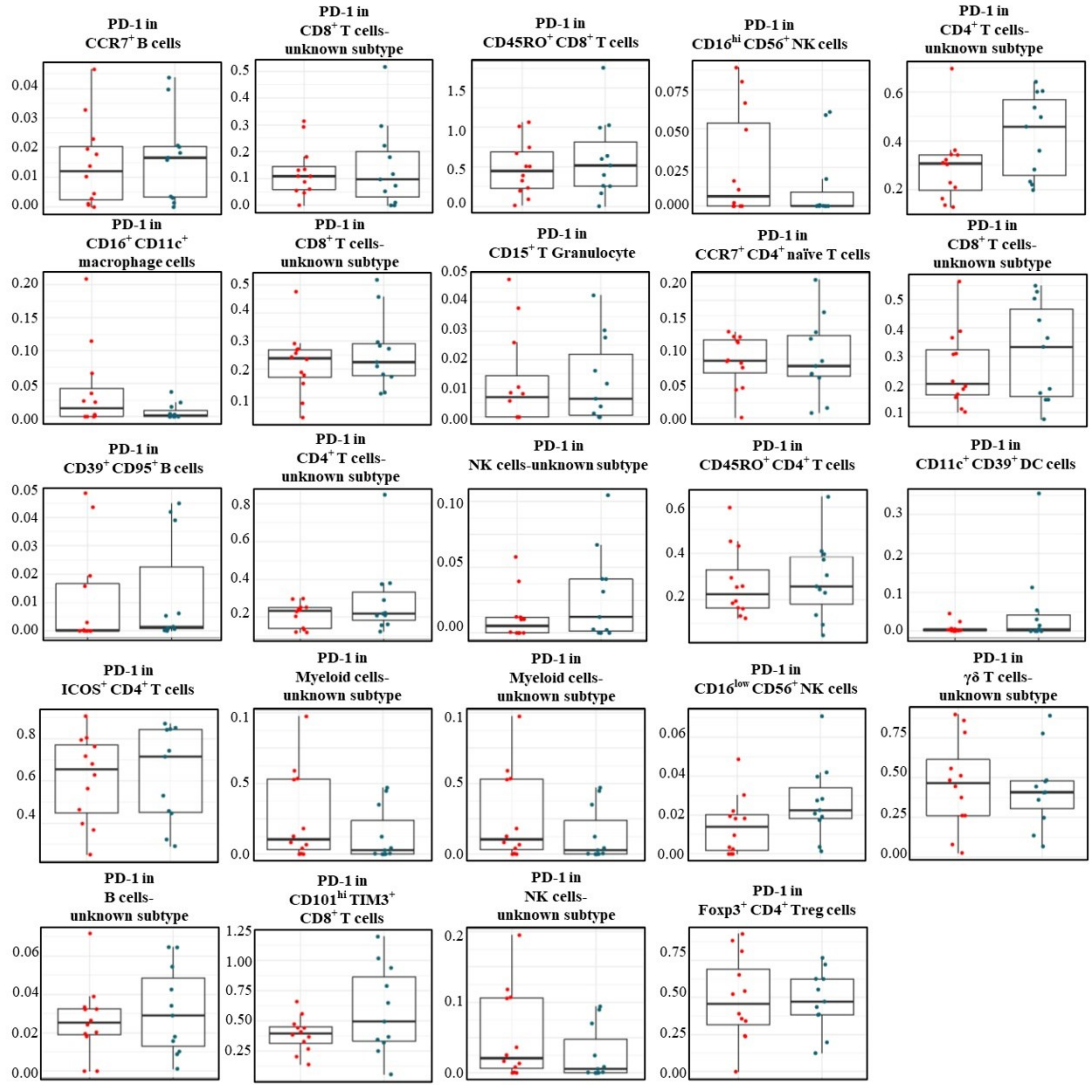

**Supplementary figure 10. Relative distributions of PD1 expression in different major immune cell populations of responders (n=11) and non-responders (n=14).** The box plots represent the interquartile range (IQR), with the horizontal line indicating the median. The whiskers extend to the farthest data point within a maximum of  $1.5 \times \text{IQR}$ .

Supplementary data

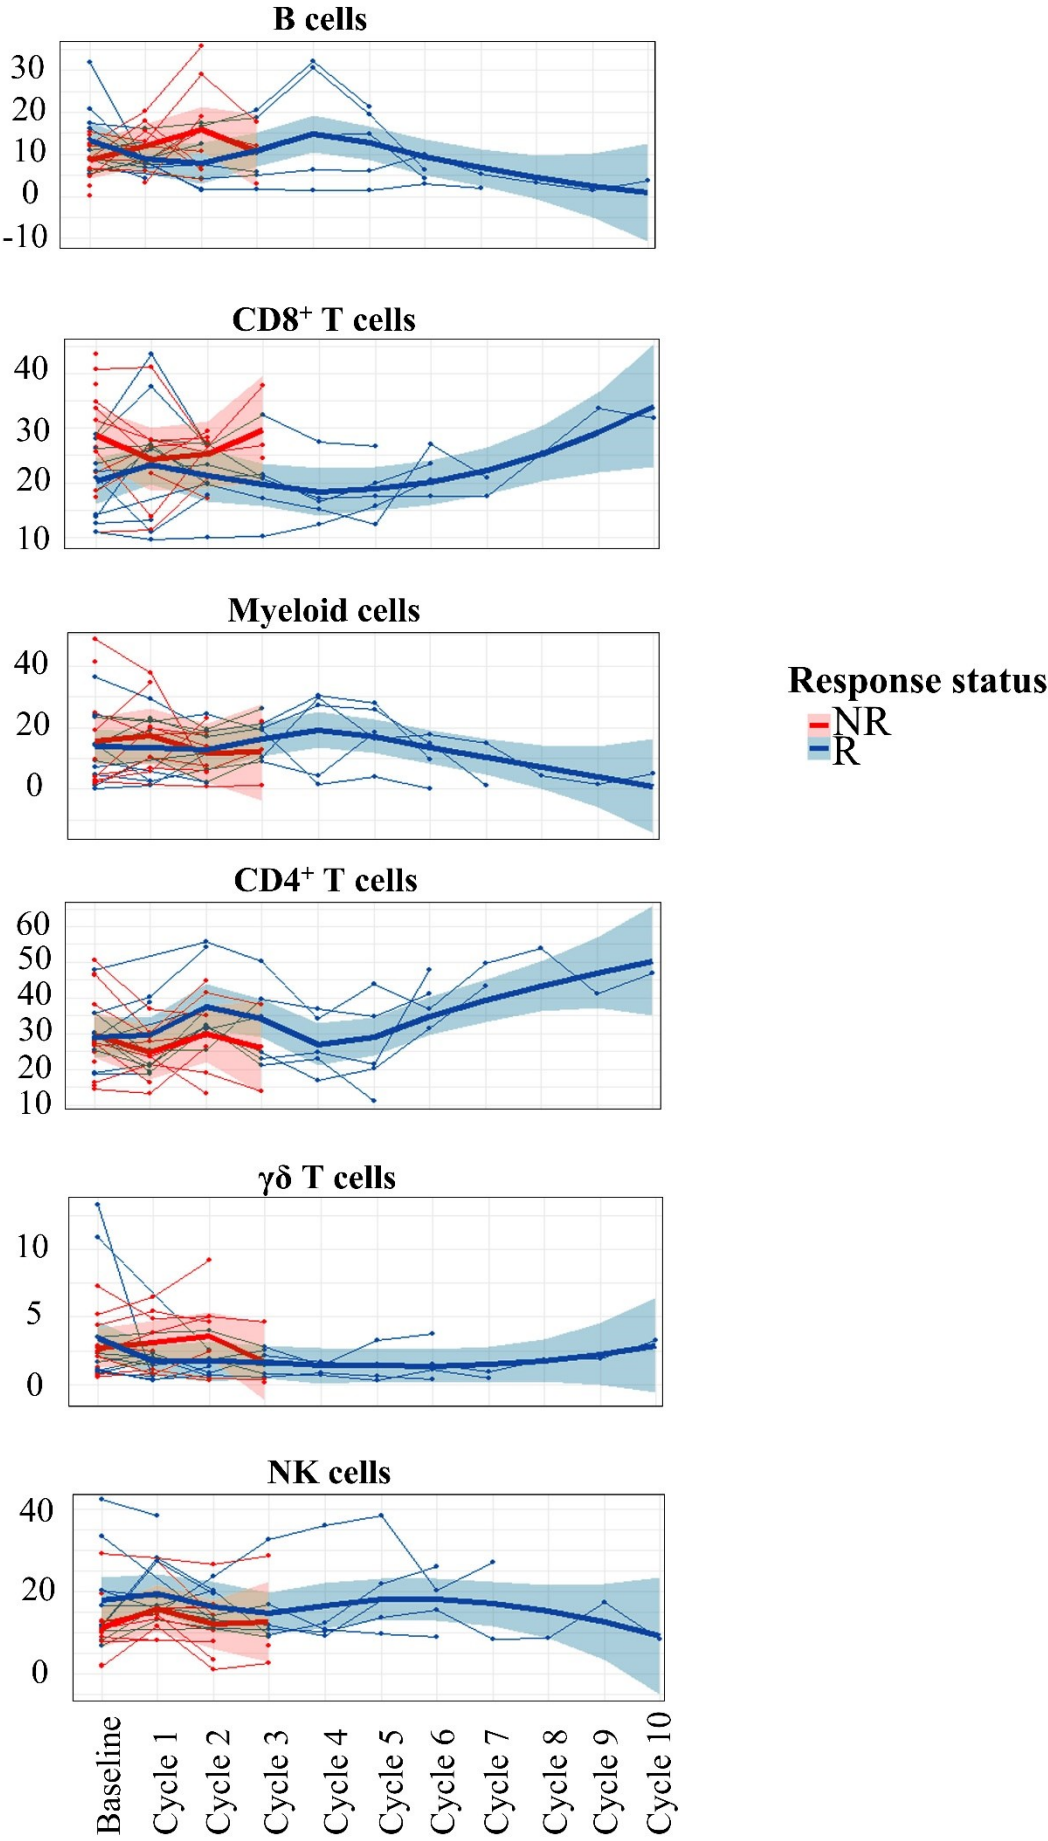

**Supplementary figure 11. Longitudinal behavior of antigens in major types of immune cells compared between responders (n=11) and non-responders (n=14). Data are presented as mean values +/- SD.**

# Supplementary data

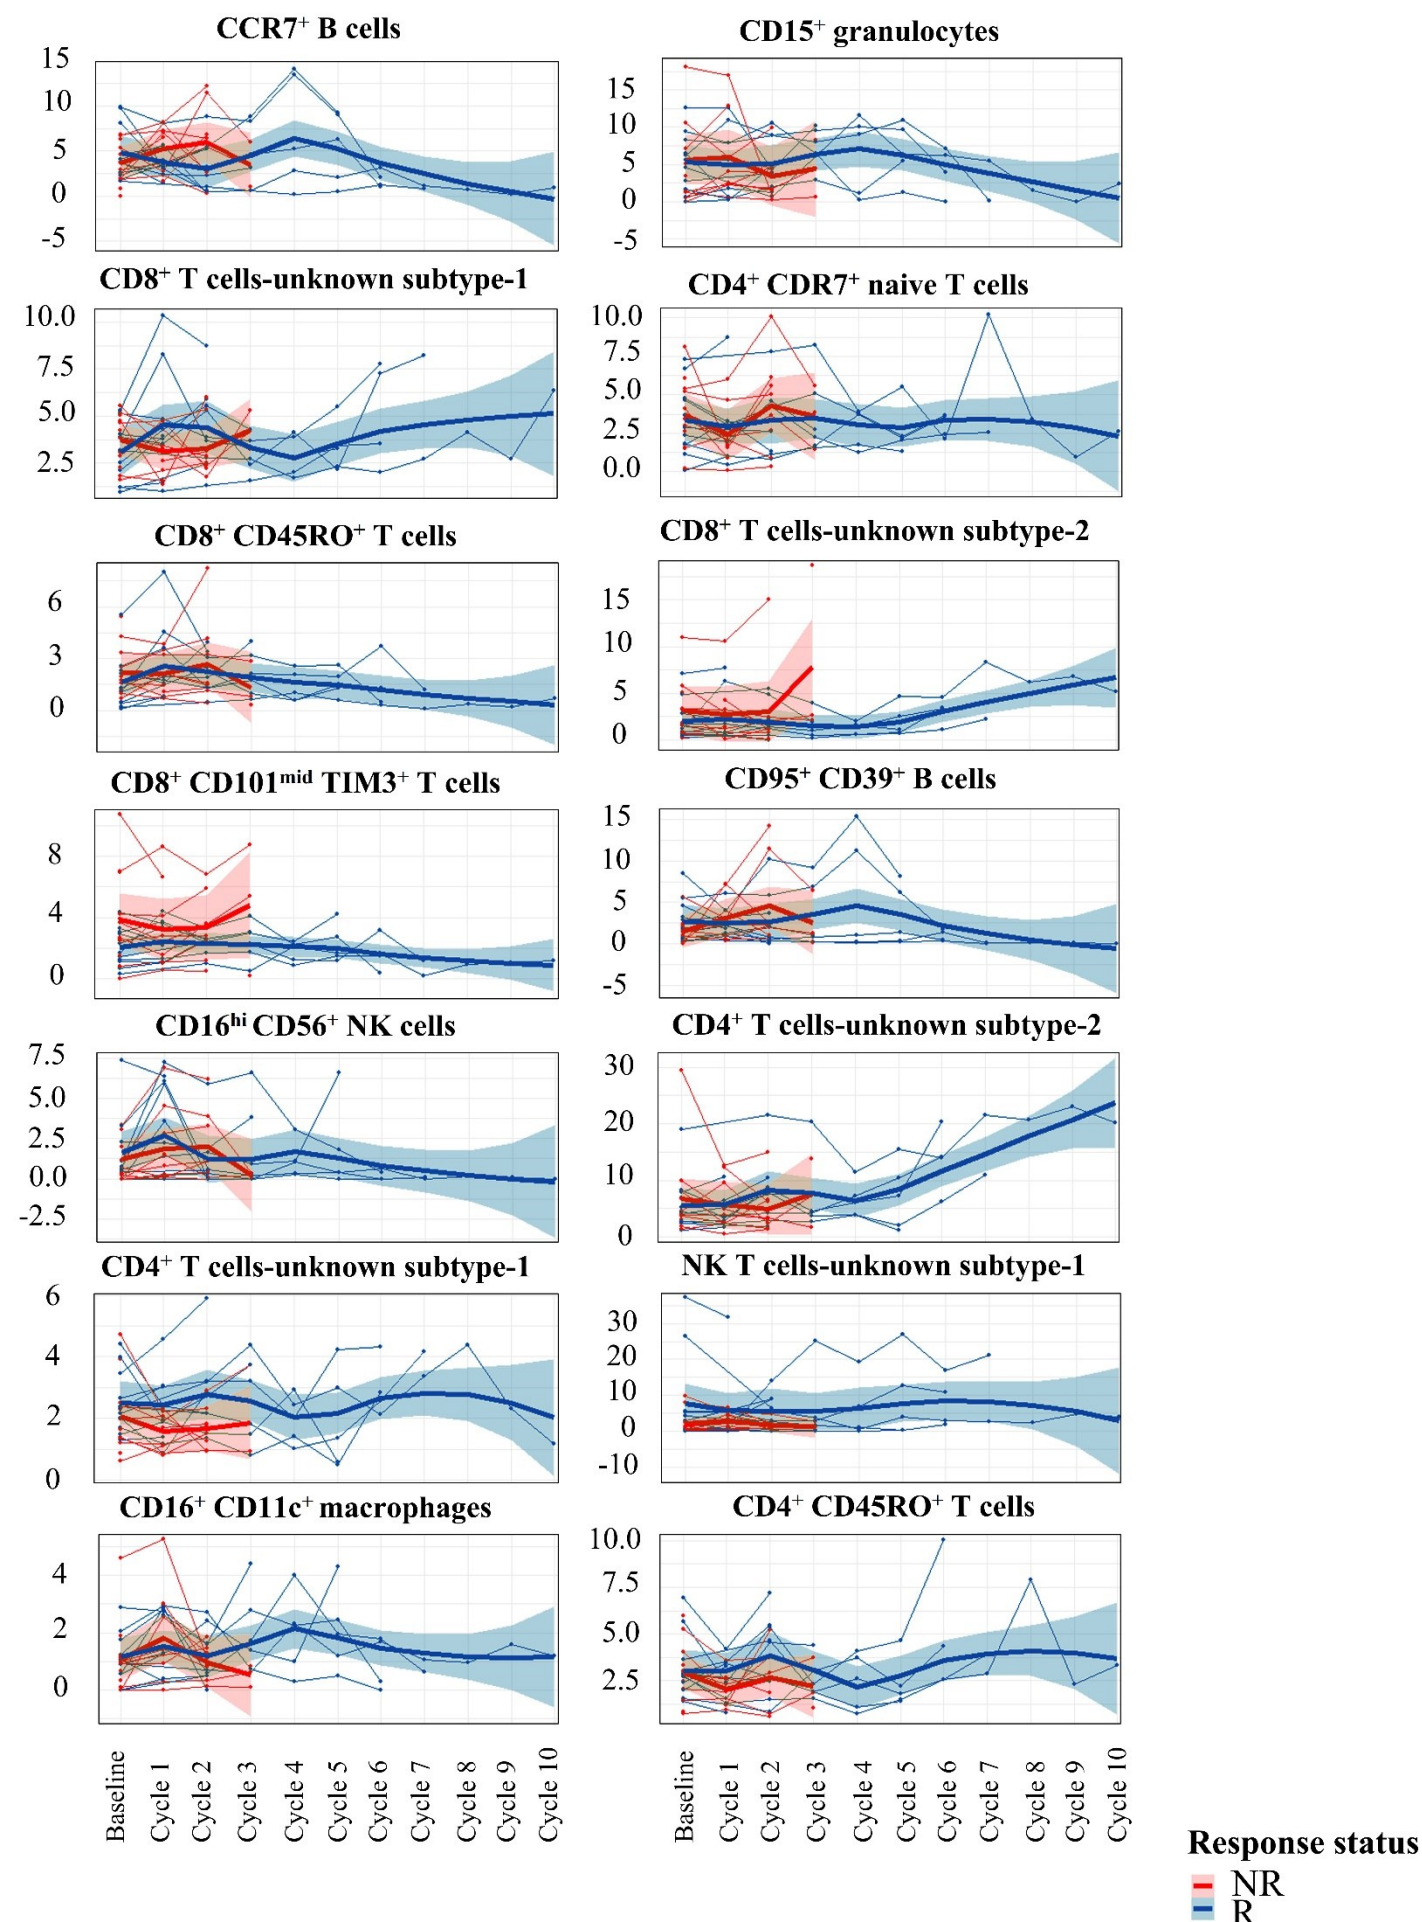

**Supplementary figure 12-1. Longitudinal behavior of subtypes of immune cells compared between responders (n=11) and non-responders (n=14). Data are presented as mean values +/- SD.**



# Supplementary data

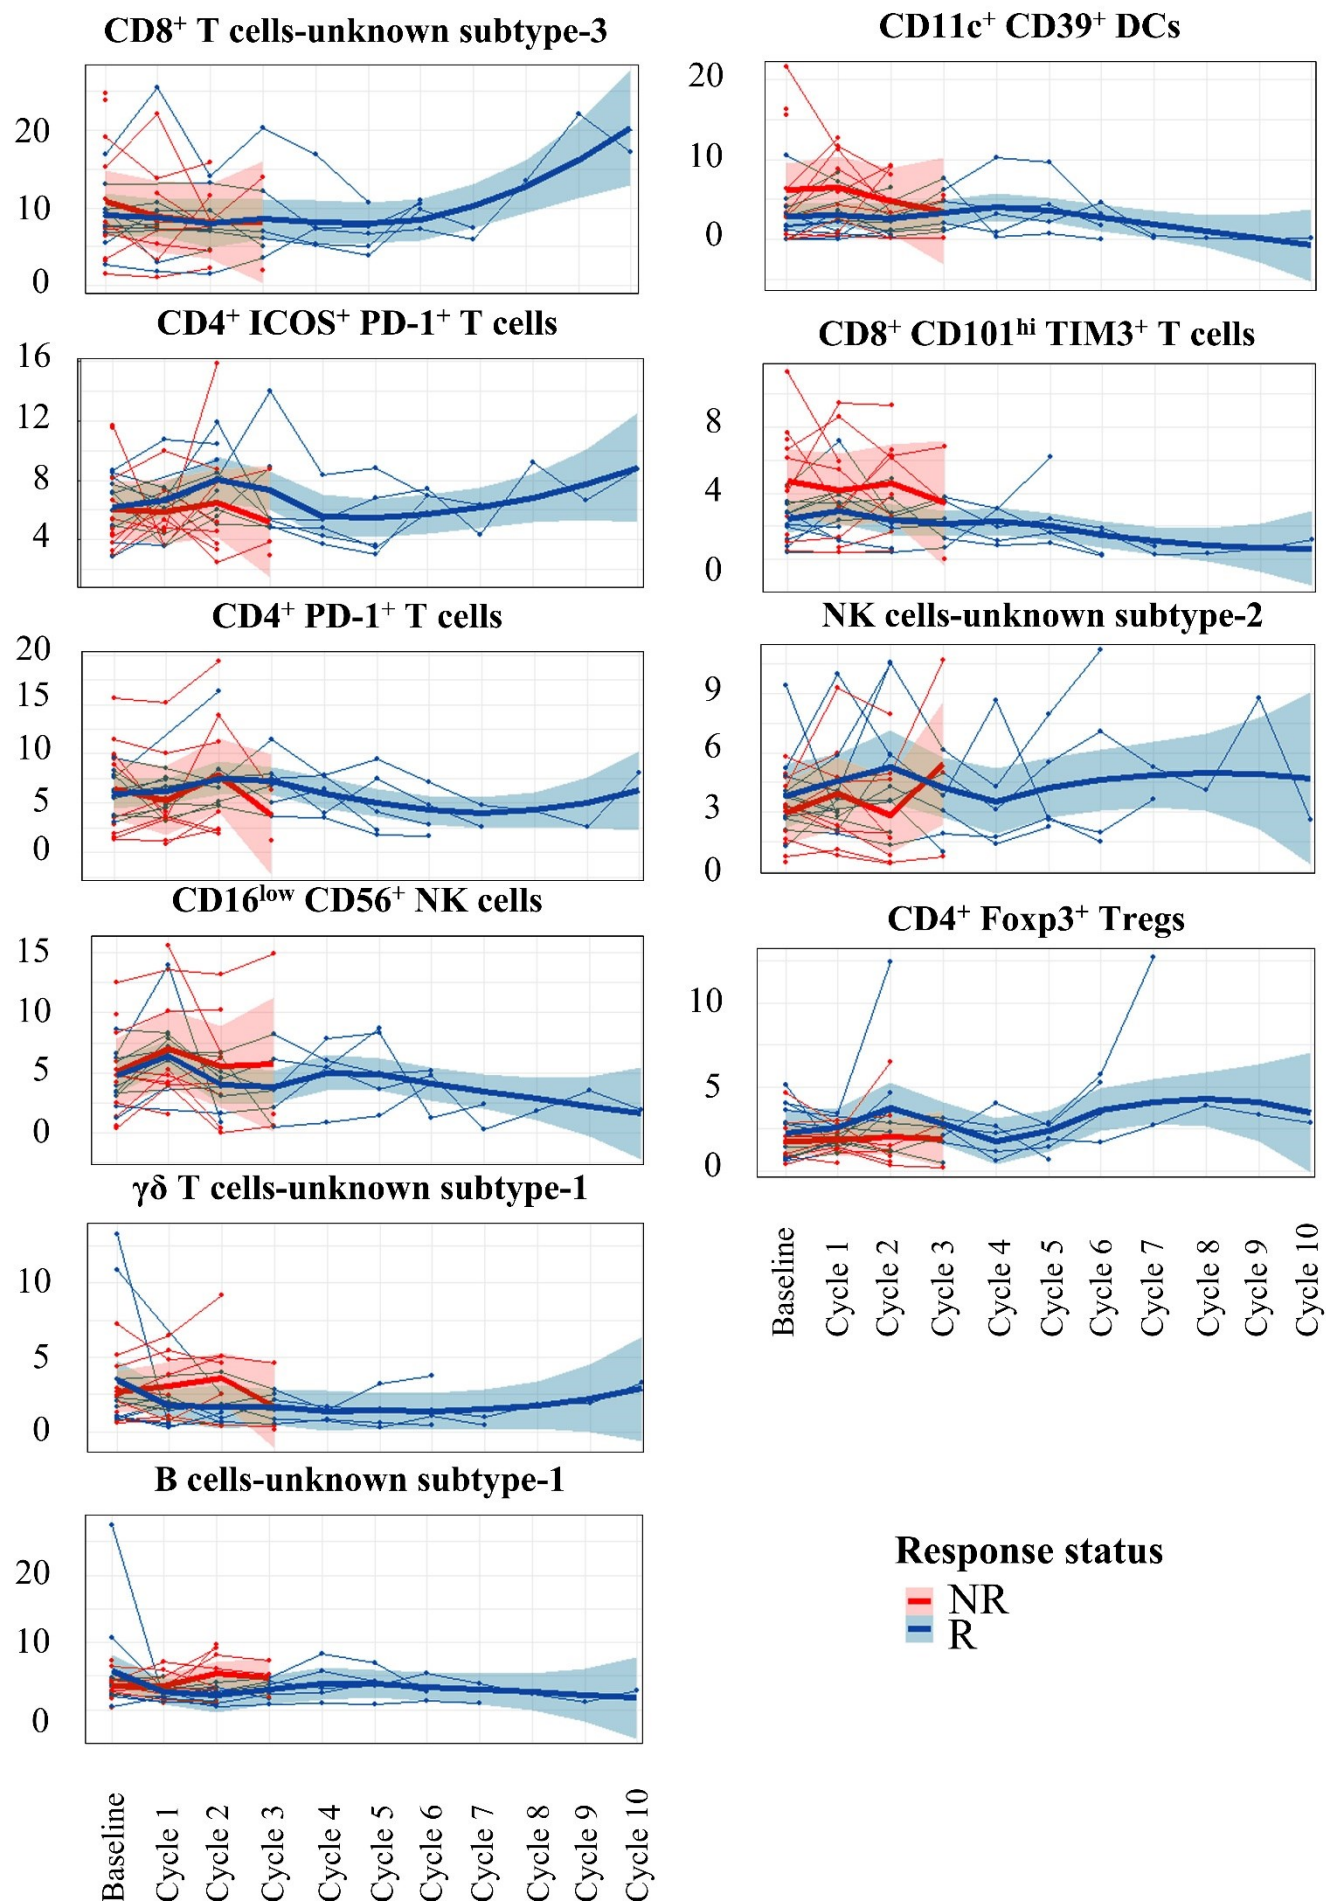

**Supplementary figure 12-2. Longitudinal behavior of subtypes of immune cells compared between responders (n=11) and non-responders (n=14). Data are presented as mean values +/- SD.**

## Supplementary data

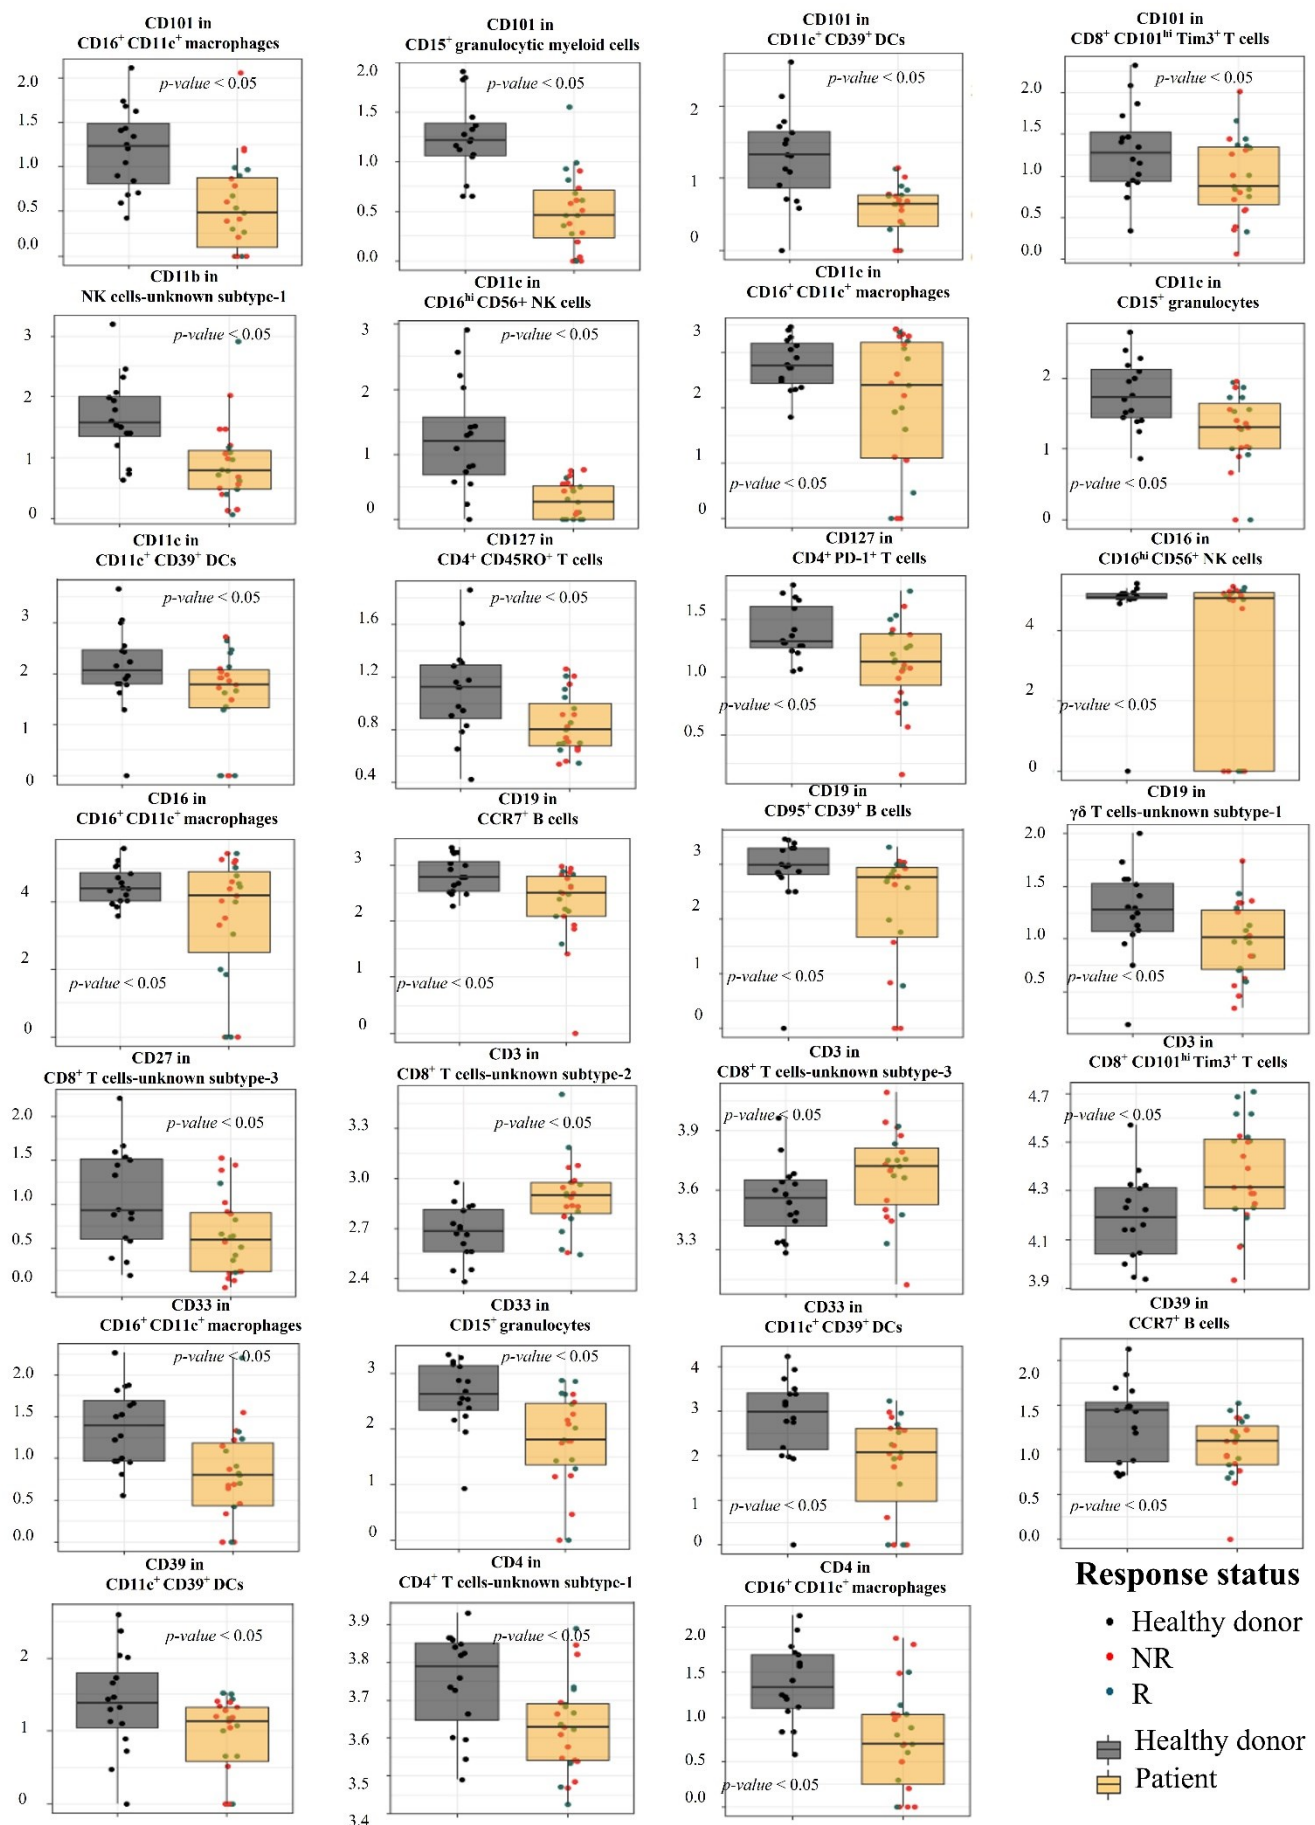

**Supplementary figure 13-1. Antigens of immune cells with a  $p\text{-value} < 0.05$  when comparing patients (n=25) and healthy donors (n=16) (at baseline).** The box plots represent the interquartile range (IQR), with the horizontal line indicating the median. The whiskers extend to the farthest data point within a maximum of  $1.5 \times \text{IQR}$ . All  $p\text{-values}$  were calculated using two-sided t-tests comparing the patients to the HD and were corrected for multiple comparisons using the Benjamini-Hochberg adjustment.

Supplementary data

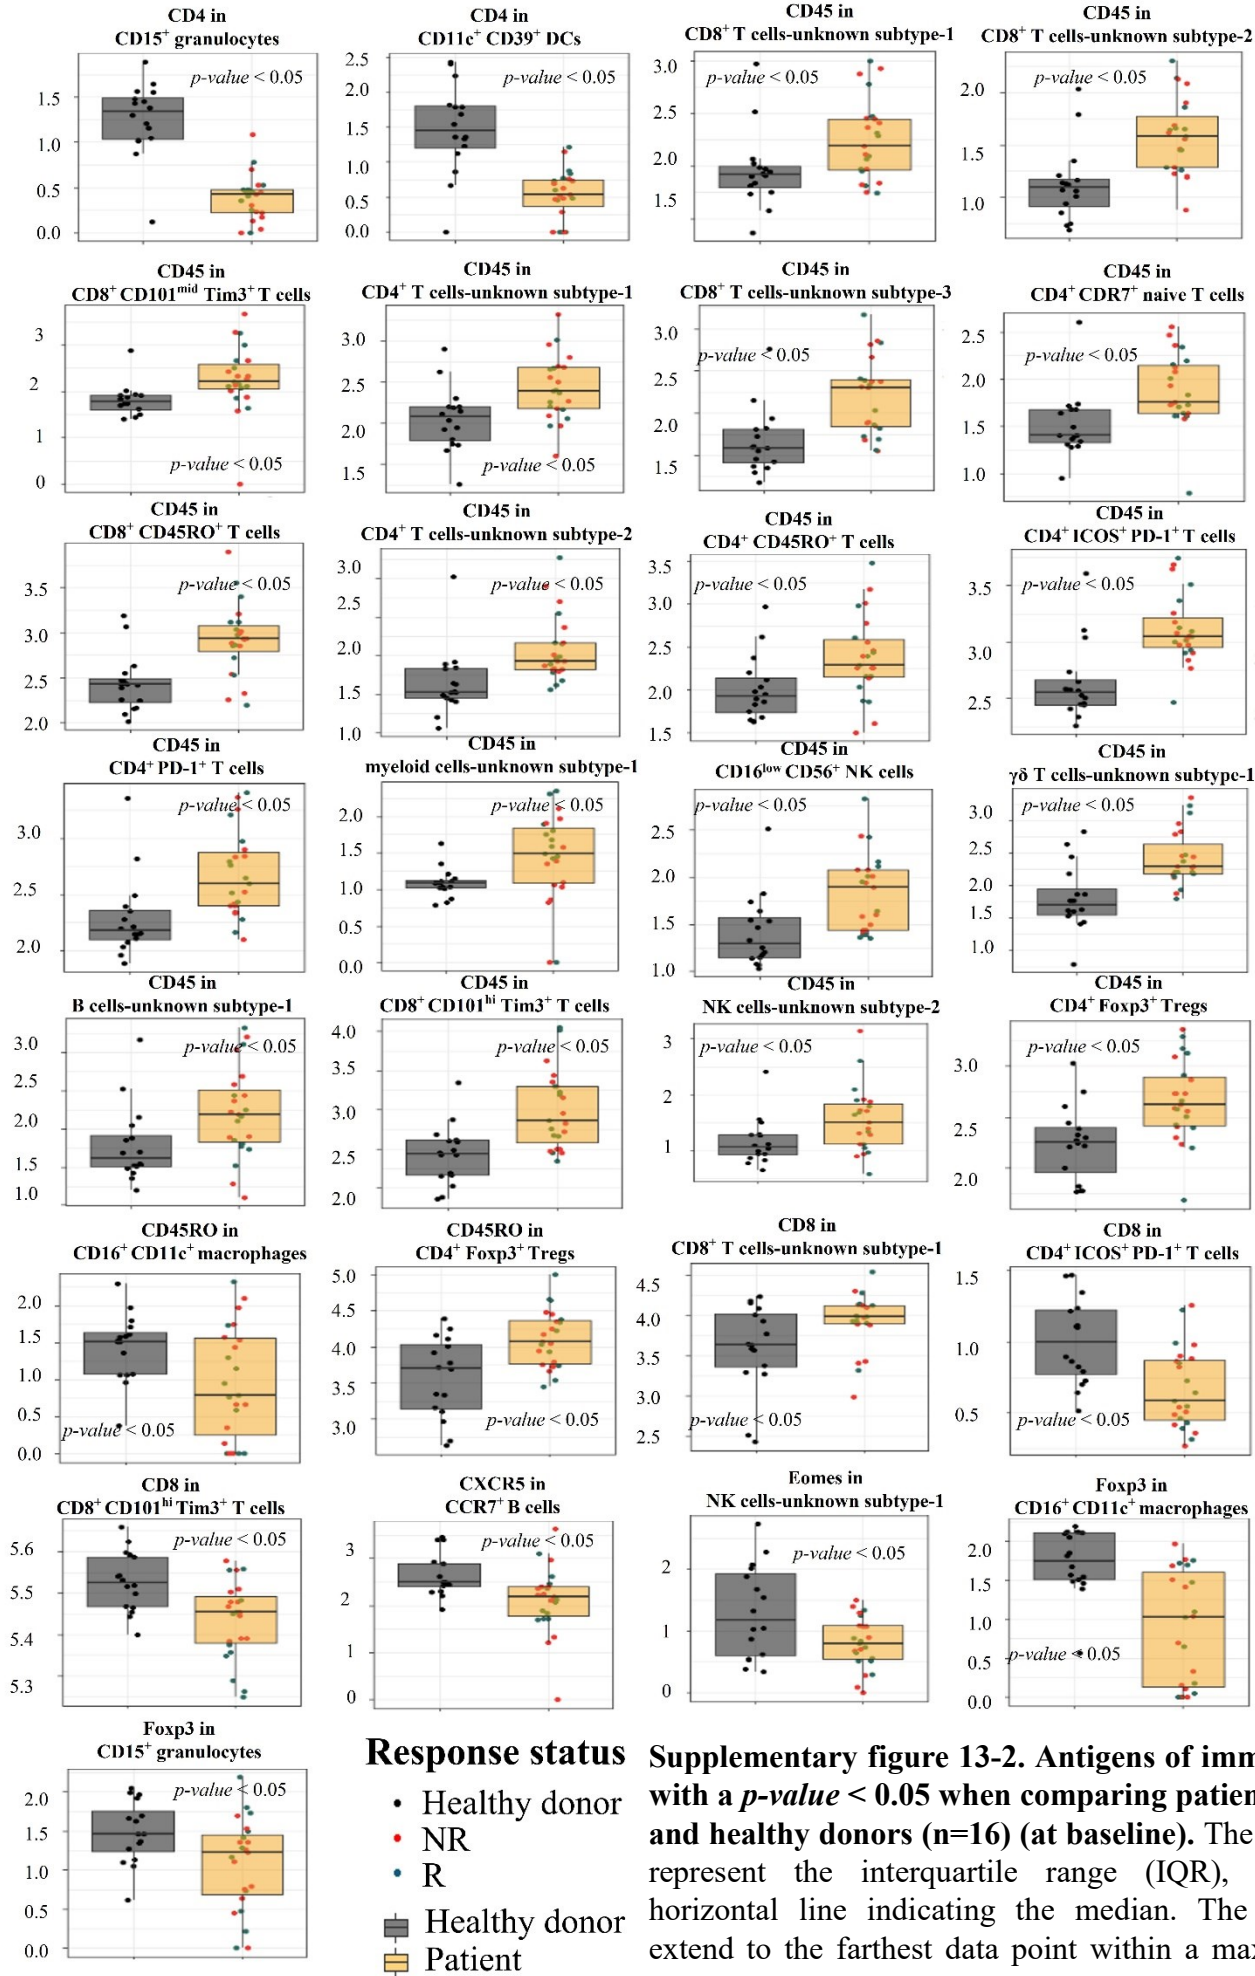



# Supplementary data

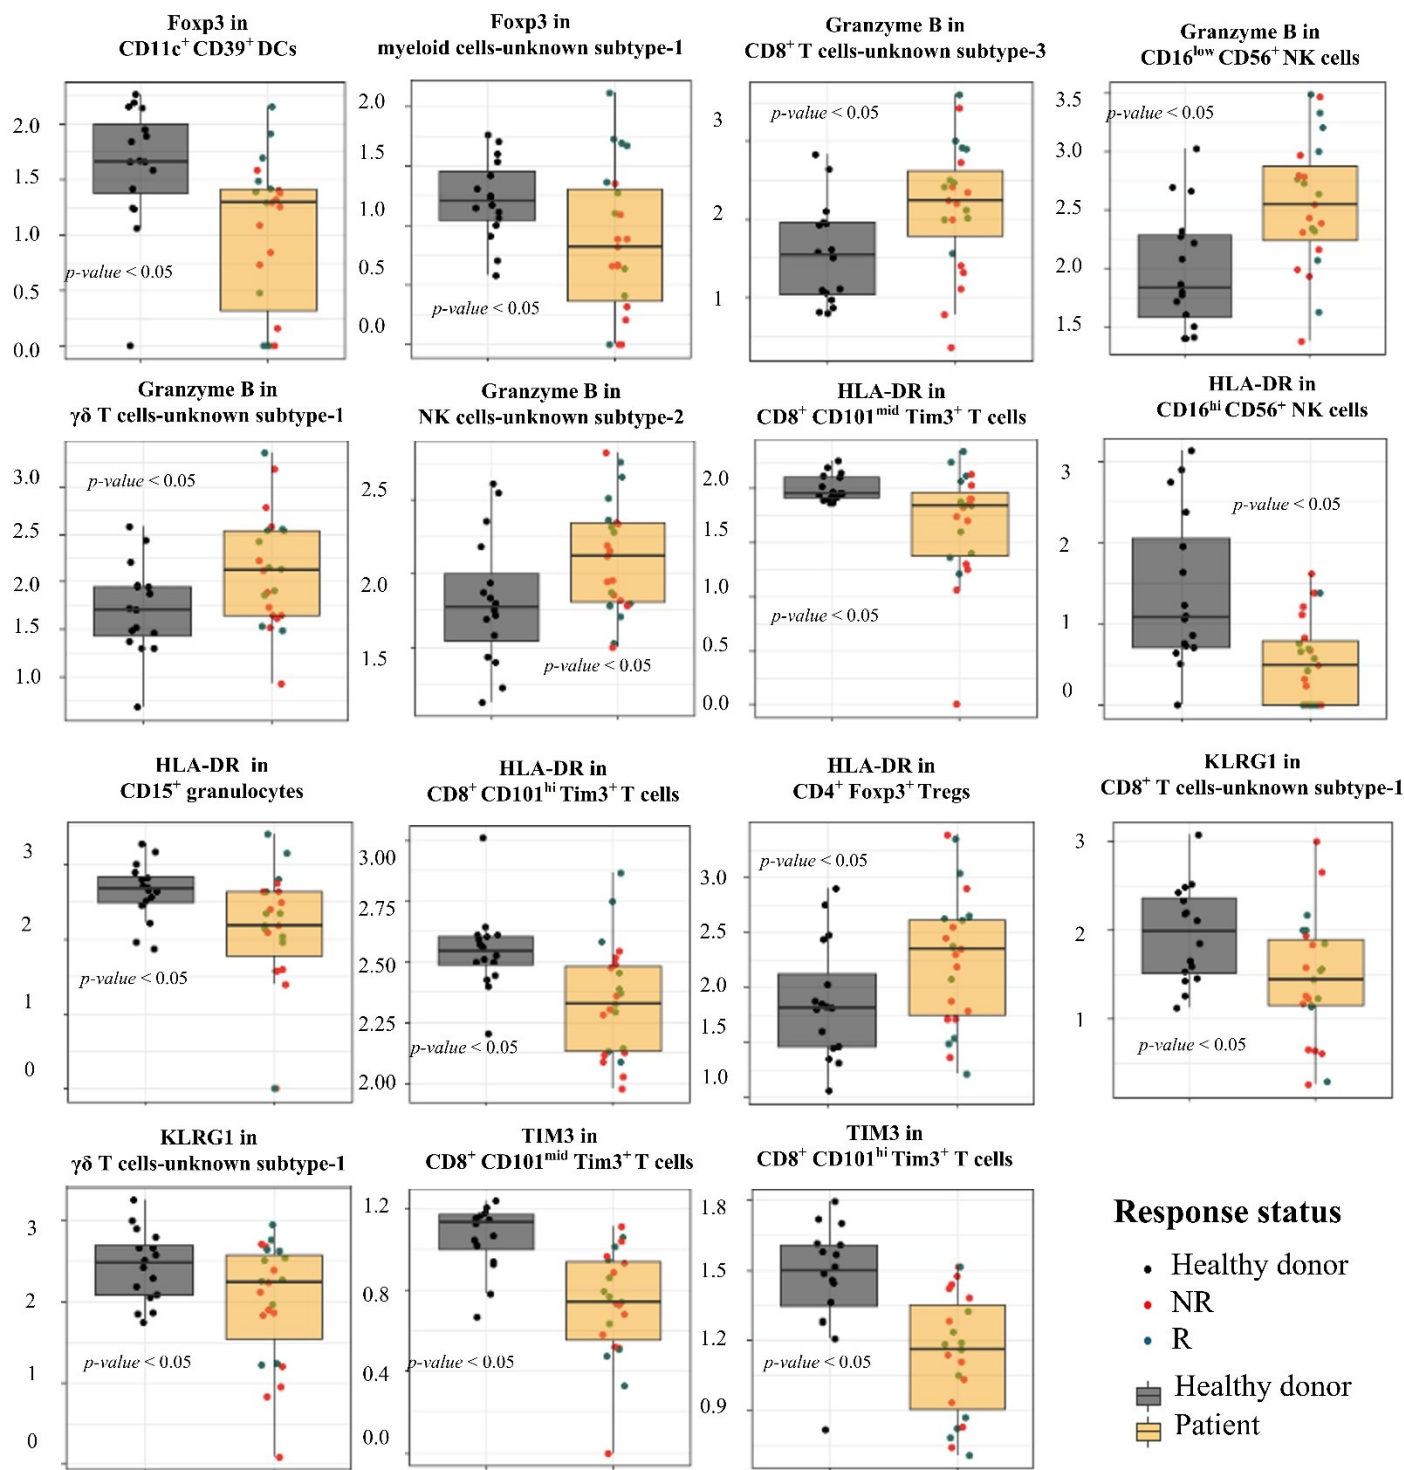

**Supplementary figure 13-3. Antigens of immune cells with a  $p\text{-value} < 0.05$  when comparing patients ( $n=25$ ) and healthy donors ( $n=16$ ) (at baseline).** The box plots represent the interquartile range (IQR), with the horizontal line indicating the median. The whiskers extend to the farthest data point within a maximum of  $1.5 \times \text{IQR}$ . All  $p\text{-values}$  were calculated using two-sided t-tests comparing the patients to the HD and were corrected for multiple comparisons using the Benjamini-Hochberg adjustment.

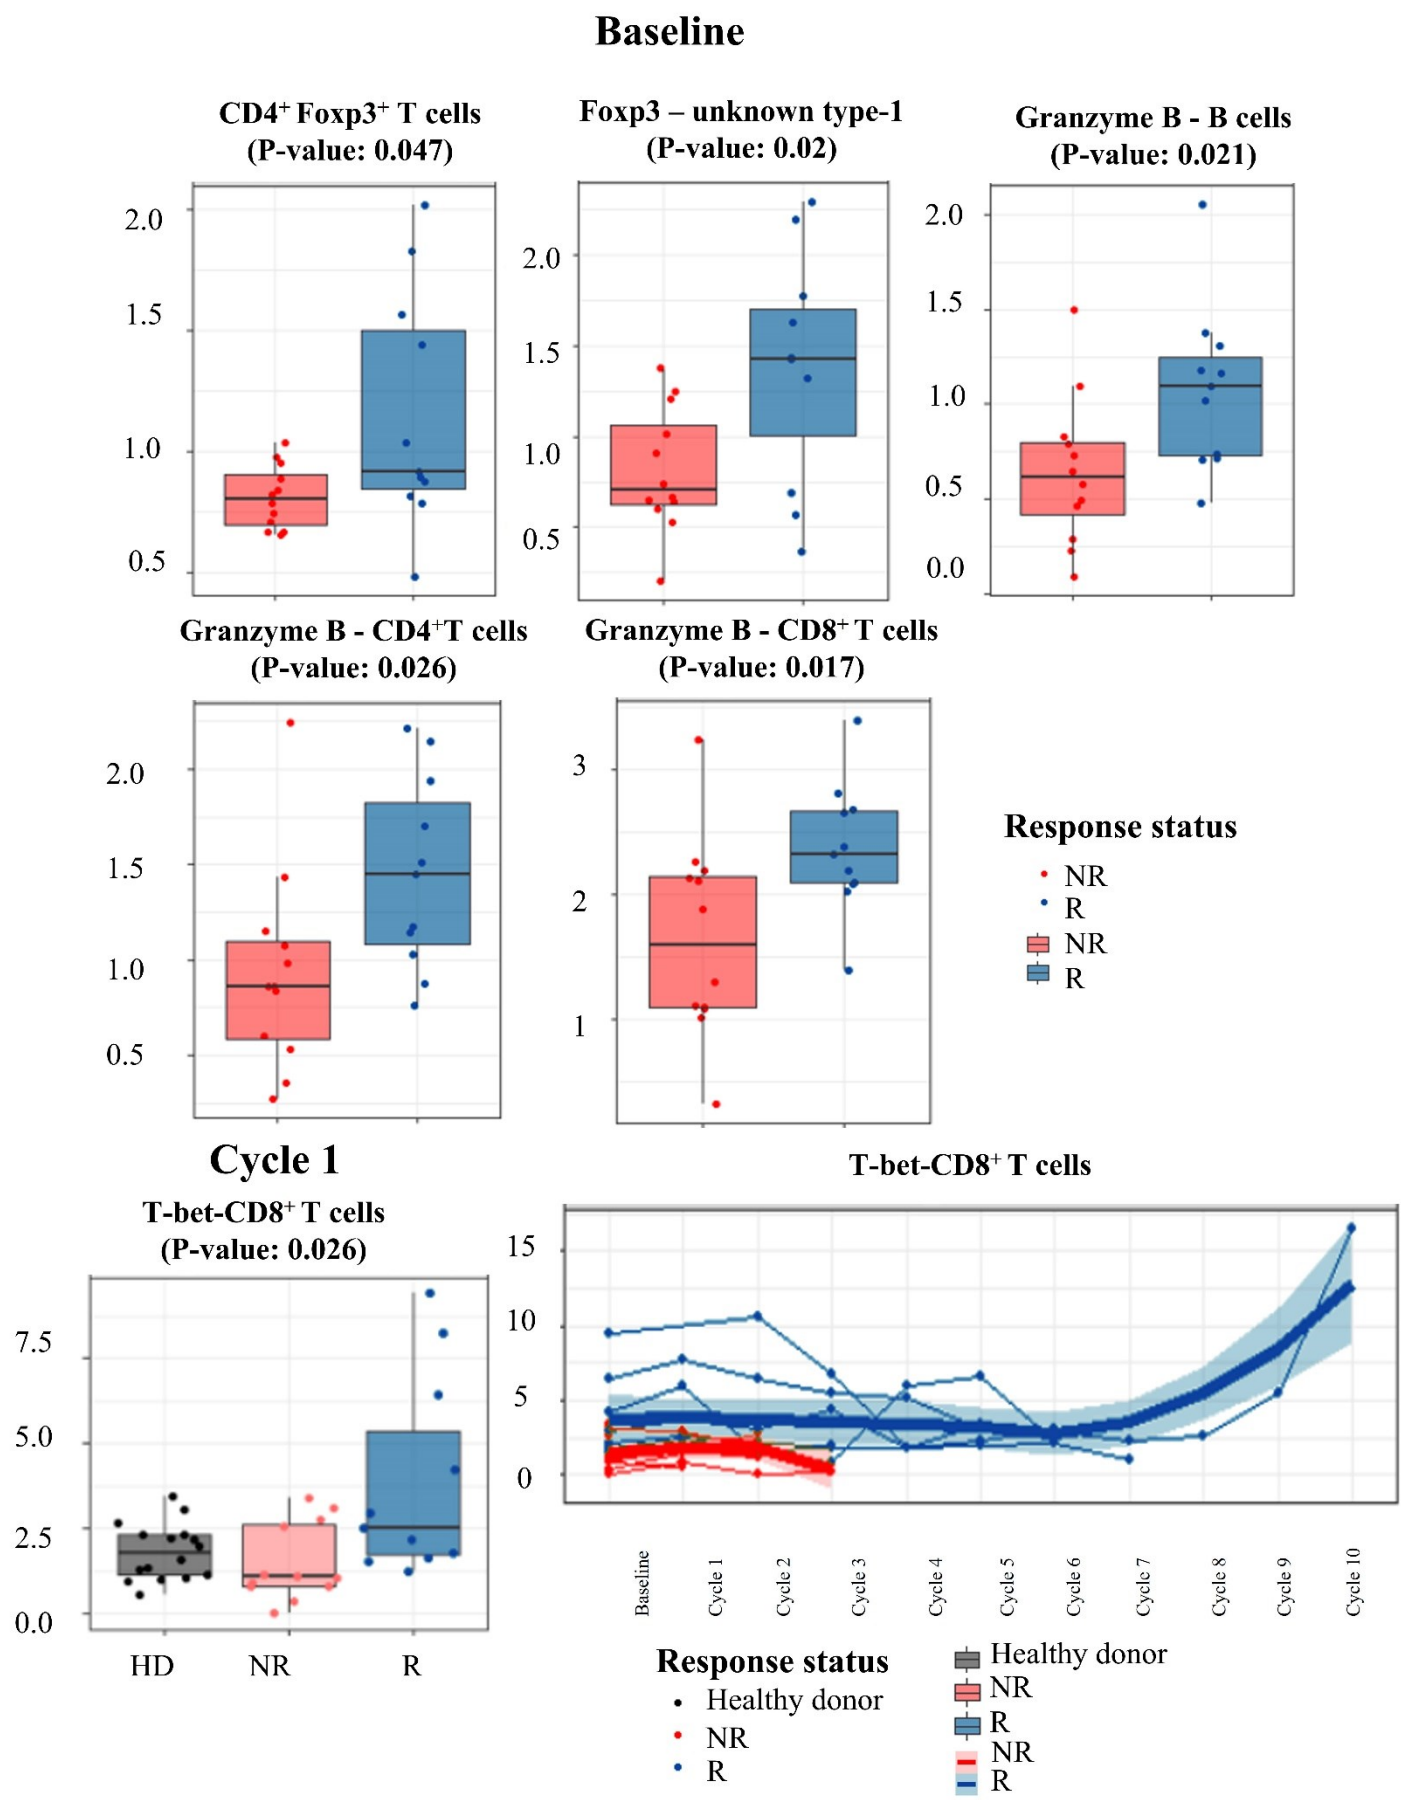

**Supplementary figure 14. Antigens on major types of immune cells with a p-value < 0.05 when comparing responders (n=11) and non-responders (n=14) (at baseline and after one cycle of anti-PD1 treatment) as well as the longitudinal behavior in patients with NSCLC.** The box plots represent the interquartile range (IQR), with the horizontal line indicating the median. The whiskers extend to the farthest data point within a maximum of  $1.5 \times \text{IQR}$ . All *p*-values were calculated using two-sided t-tests comparing the patients to the HD and were corrected for multiple comparisons using the Benjamini-Hochberg adjustment. Data in longitudinal analysis are presented as mean values  $\pm$  SD.

# Supplementary data

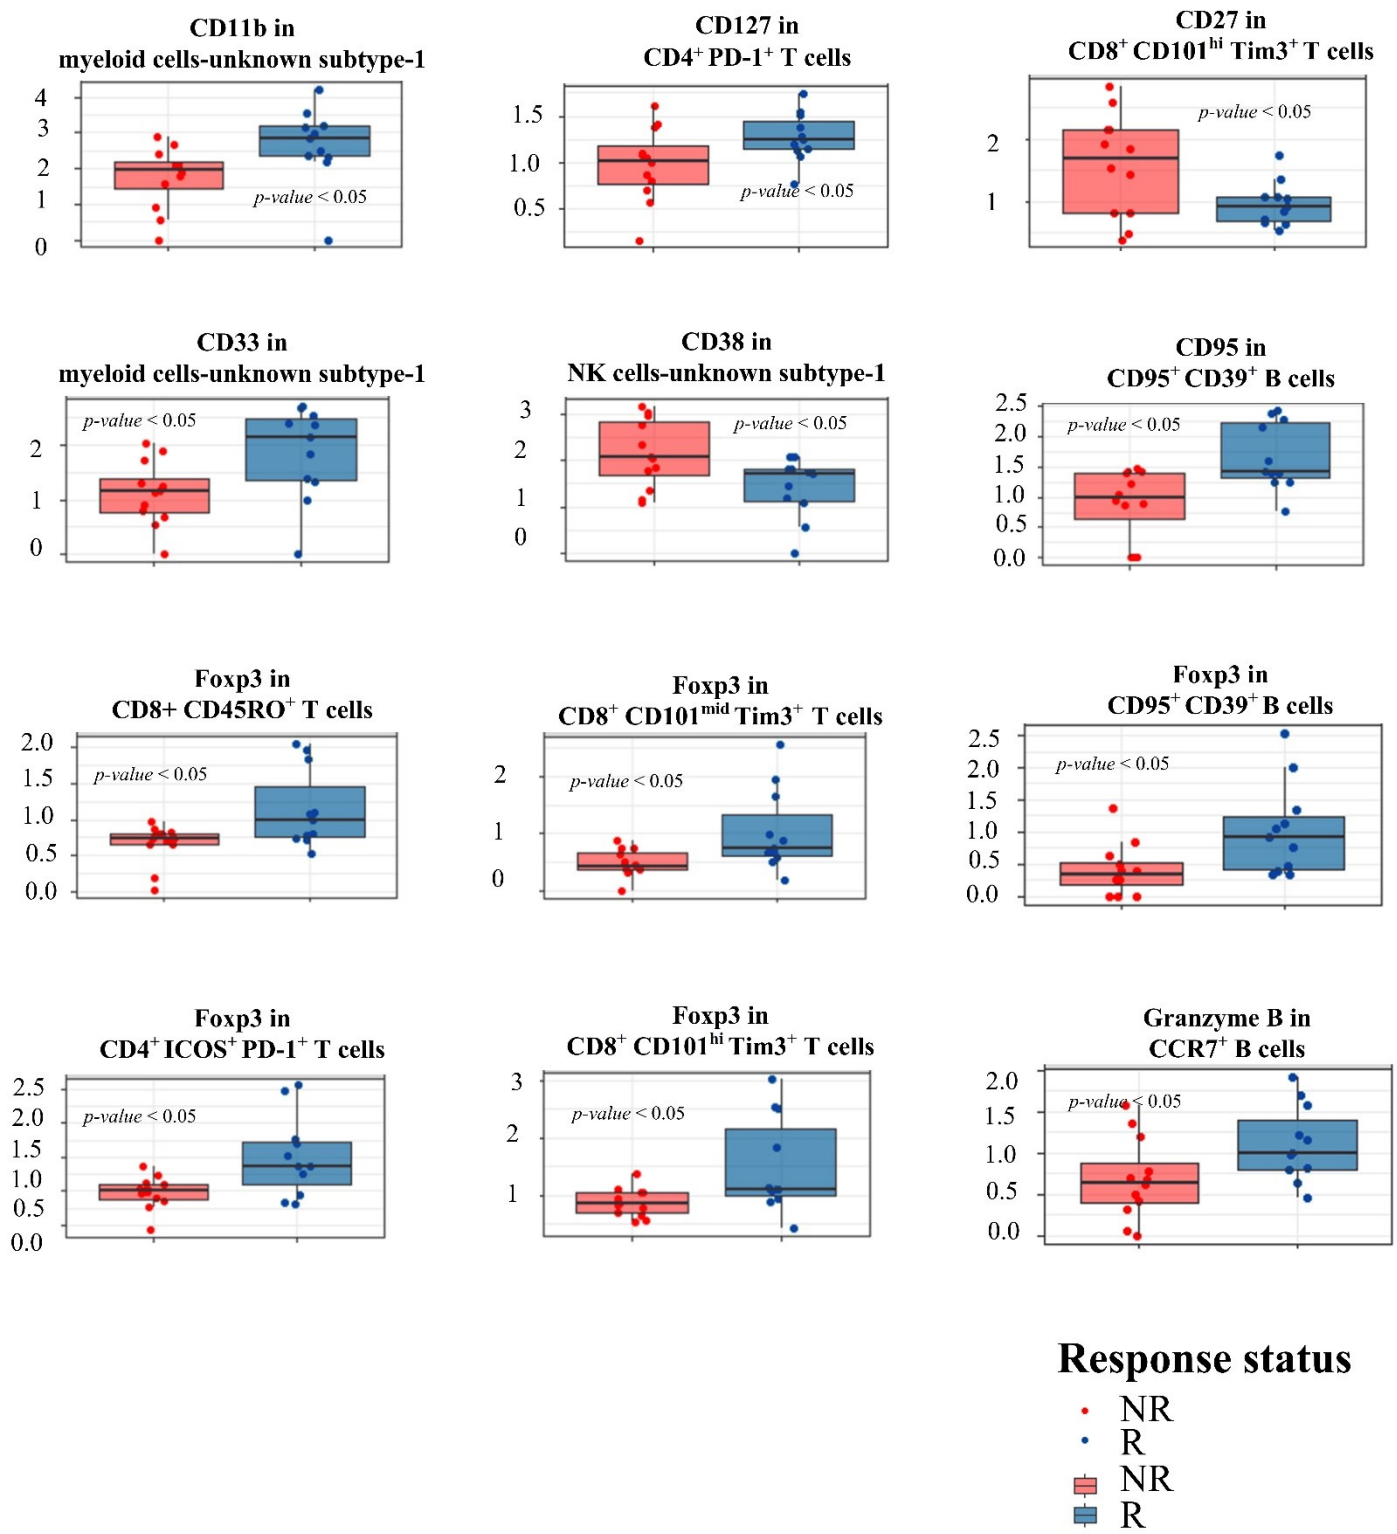

**Supplementary figure 15-1. Antigens on subsets of immune cells with a  $p\text{-value} < 0.05$  when comparing responders (n=11) and non-responders (n=14) (at baseline).** The box plots represent the interquartile range (IQR), with the horizontal line indicating the median. The whiskers extend to the farthest data point within a maximum of  $1.5 \times \text{IQR}$ . All  $p\text{-values}$  were calculated using two-sided t-tests comparing the patients to the HD and were corrected for multiple comparisons using the Benjamini-Hochberg adjustment.

# Supplementary data

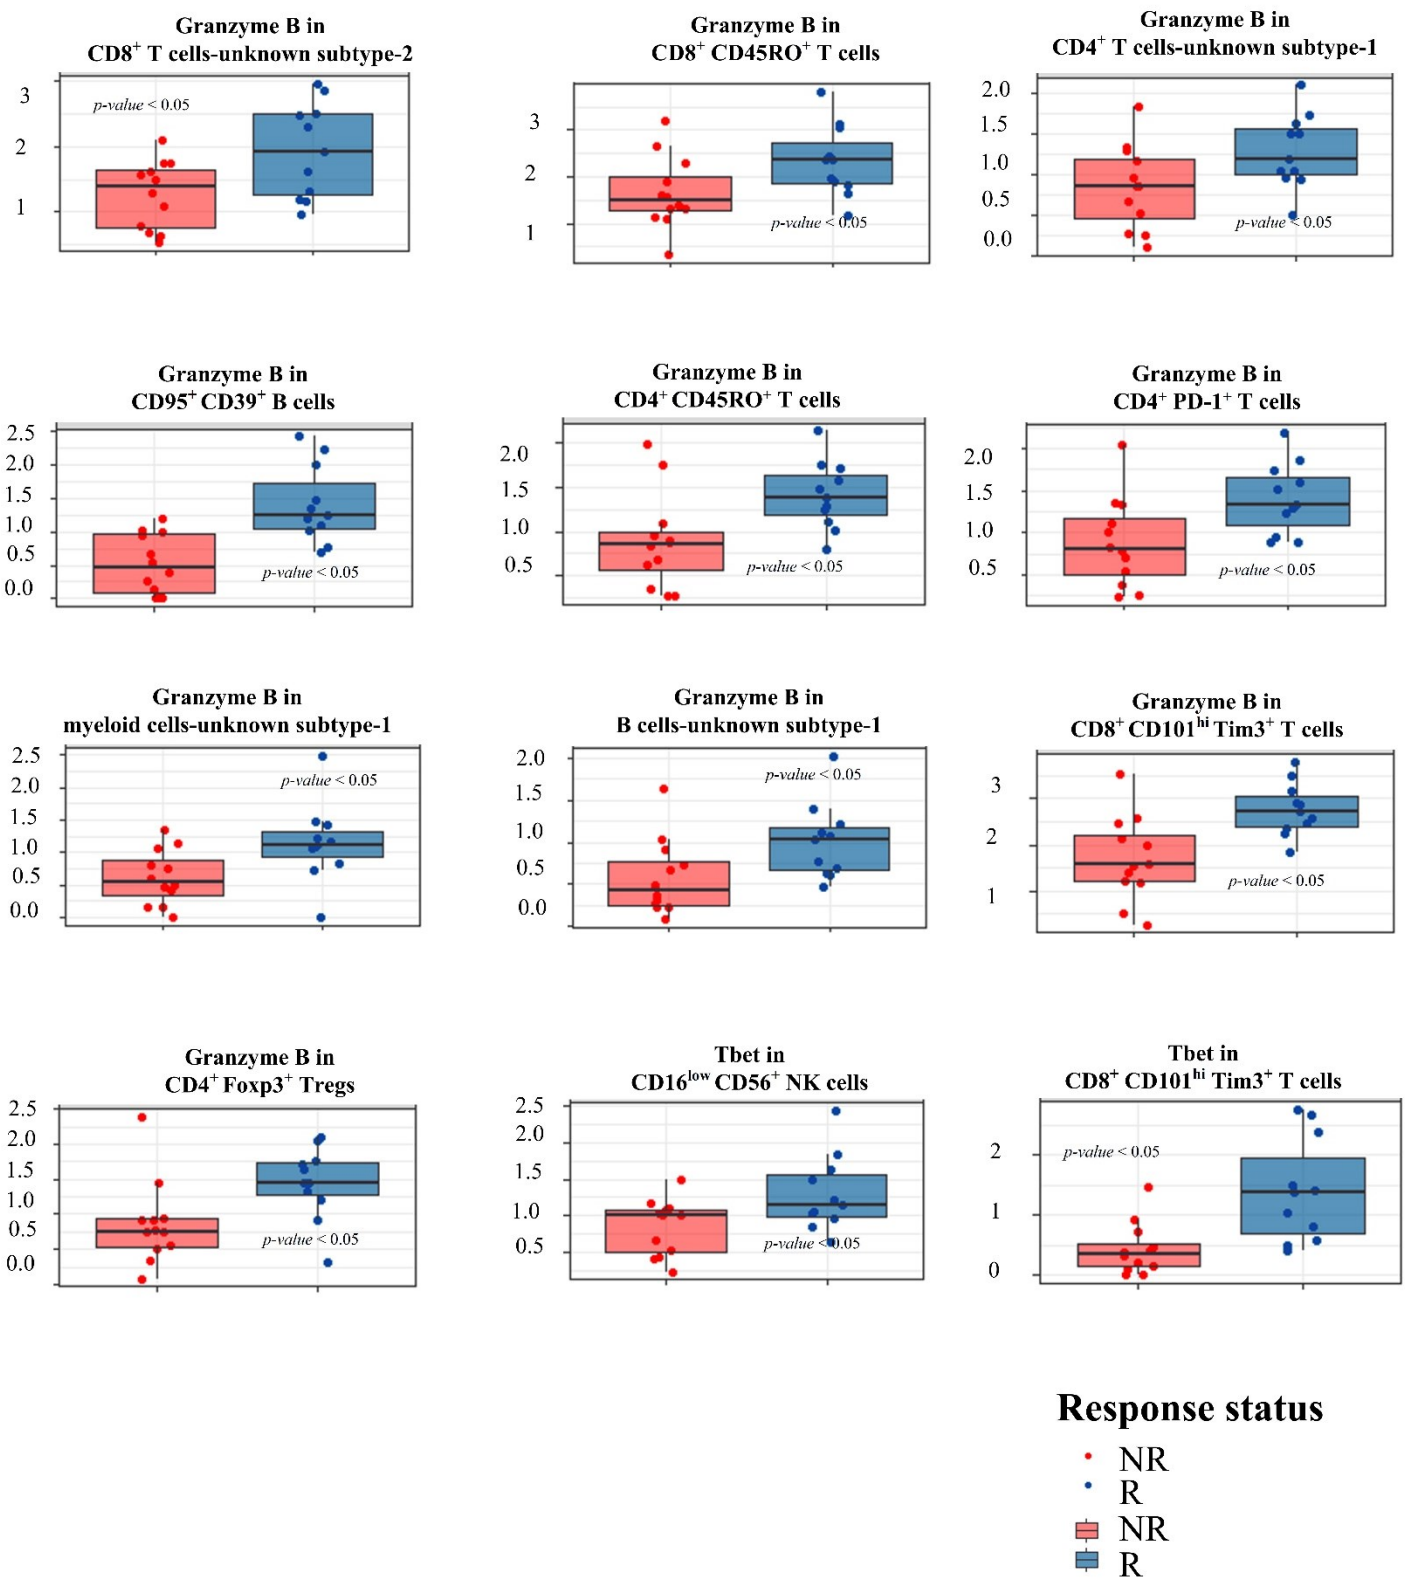

**Supplementary figure 15-2. Antigens on subsets of immune cell with a  $p\text{-value} < 0.05$  when comparing responders (n=11) and non-responders (n=14) (at baseline).** The box plots represent the interquartile range (IQR), with the horizontal line indicating the median. The whiskers extend to the farthest data point within a maximum of  $1.5 \times \text{IQR}$ . All  $p\text{-values}$  were calculated using two-sided t-tests comparing the patients to the HD and were corrected for multiple comparisons using the Benjamini-



# Supplementary data

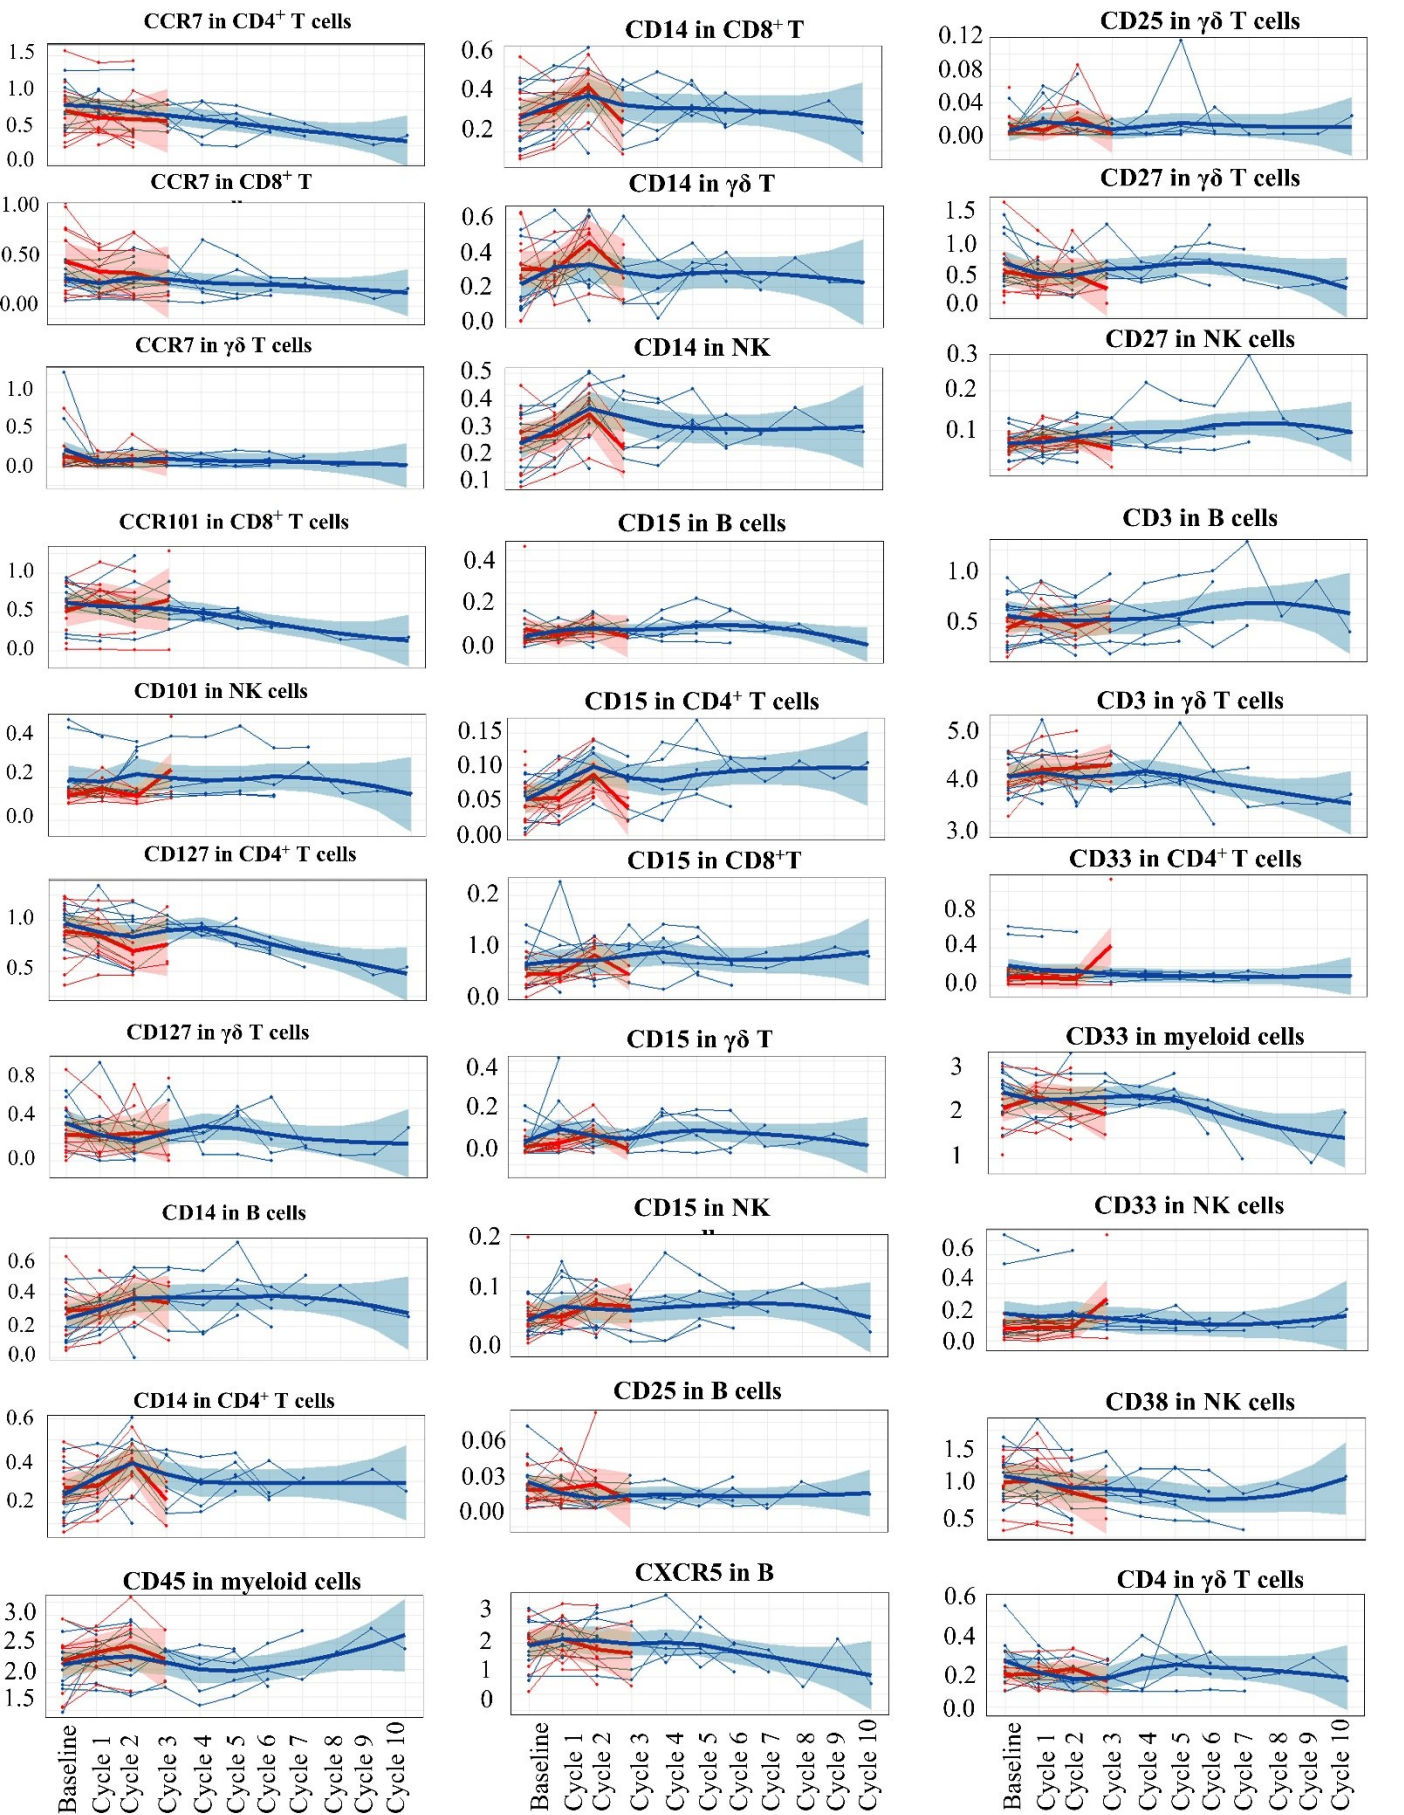

**Supplementary figure 16-1. Longitudinal behavior of antigens in major types of immune cells compared between responders (n=11) and non-responders (n=14). Data in longitudinal analysis are presented as mean values +/- SD.**

**Response status**

**NR**  
 **R**

# Supplementary data

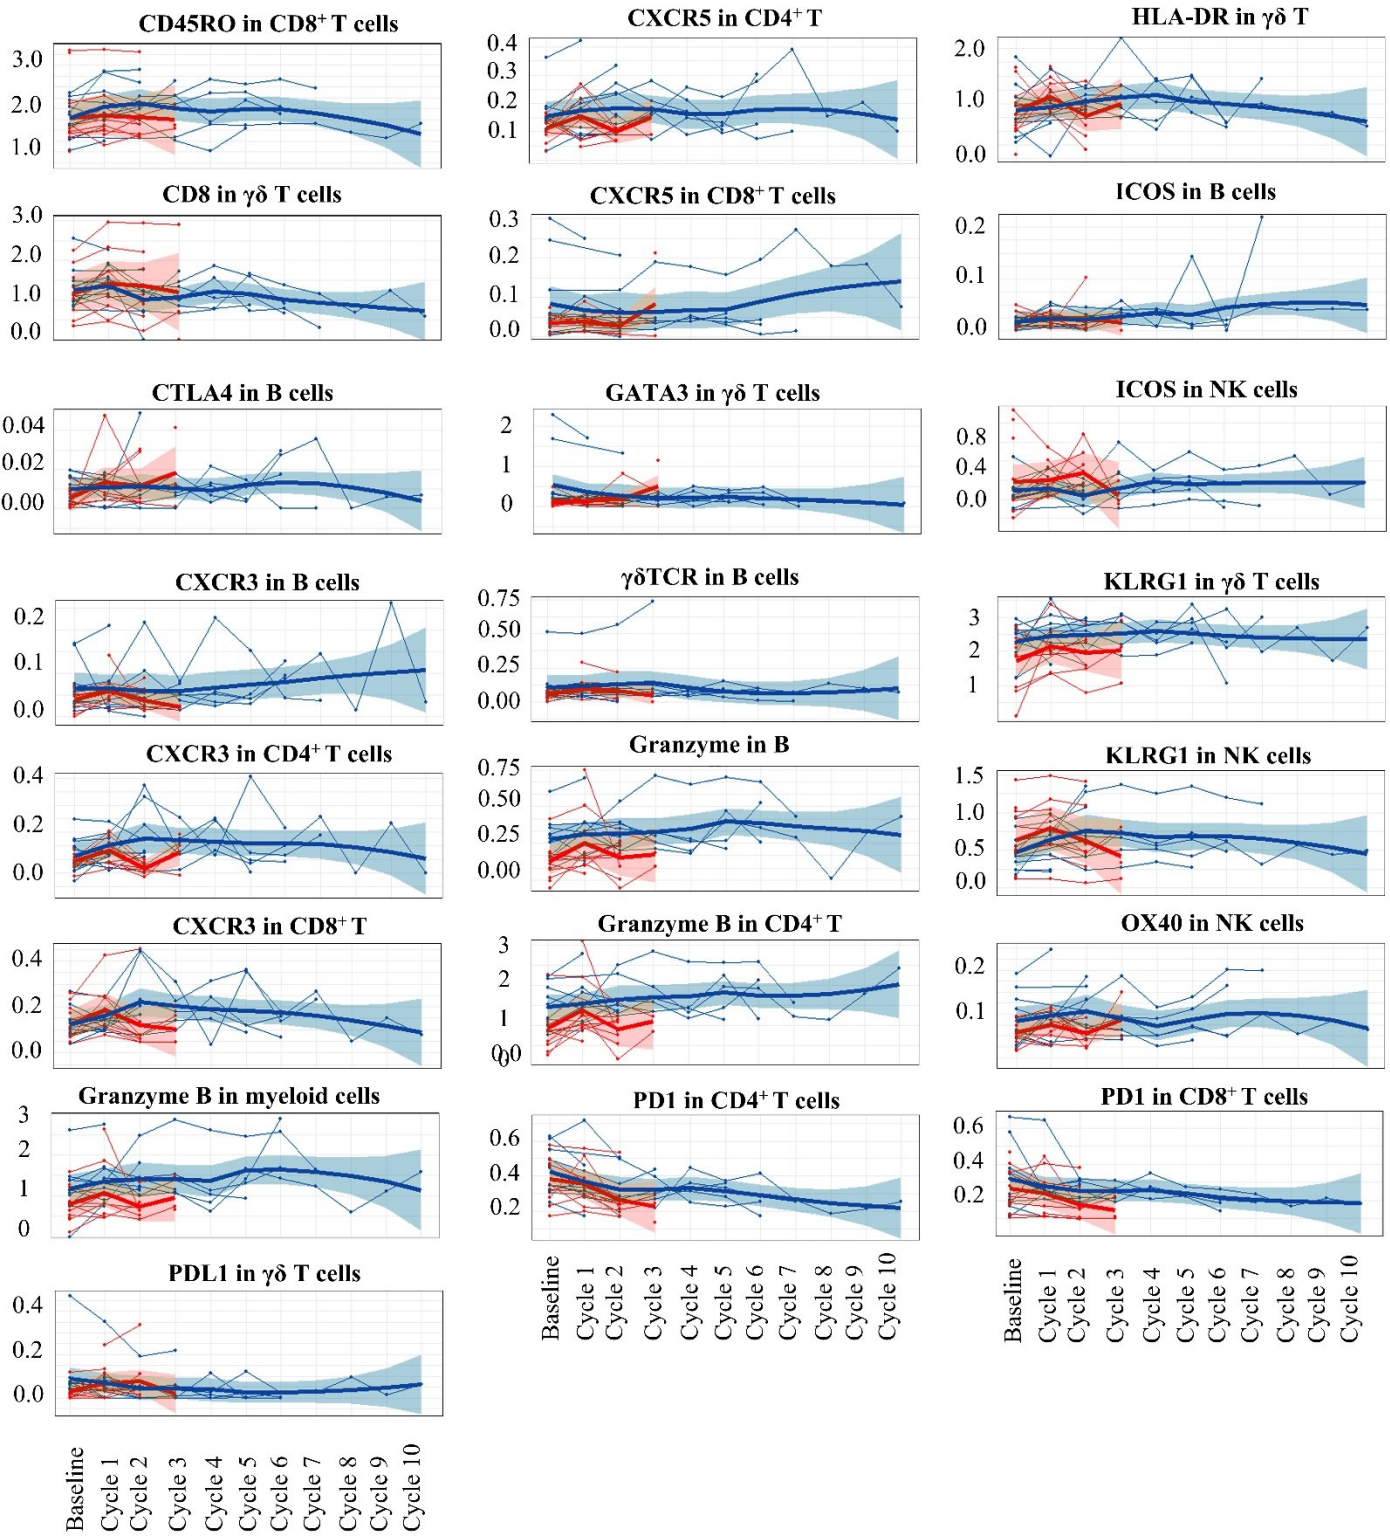

**Supplementary figure 16-2. Longitudinal behavior of antigens in major types of immune cells compared between responders (n=11) and non-responders (n=14). Data in longitudinal analysis are presented as mean values  $\pm$  SD.**

**Response status**  
NR  
R







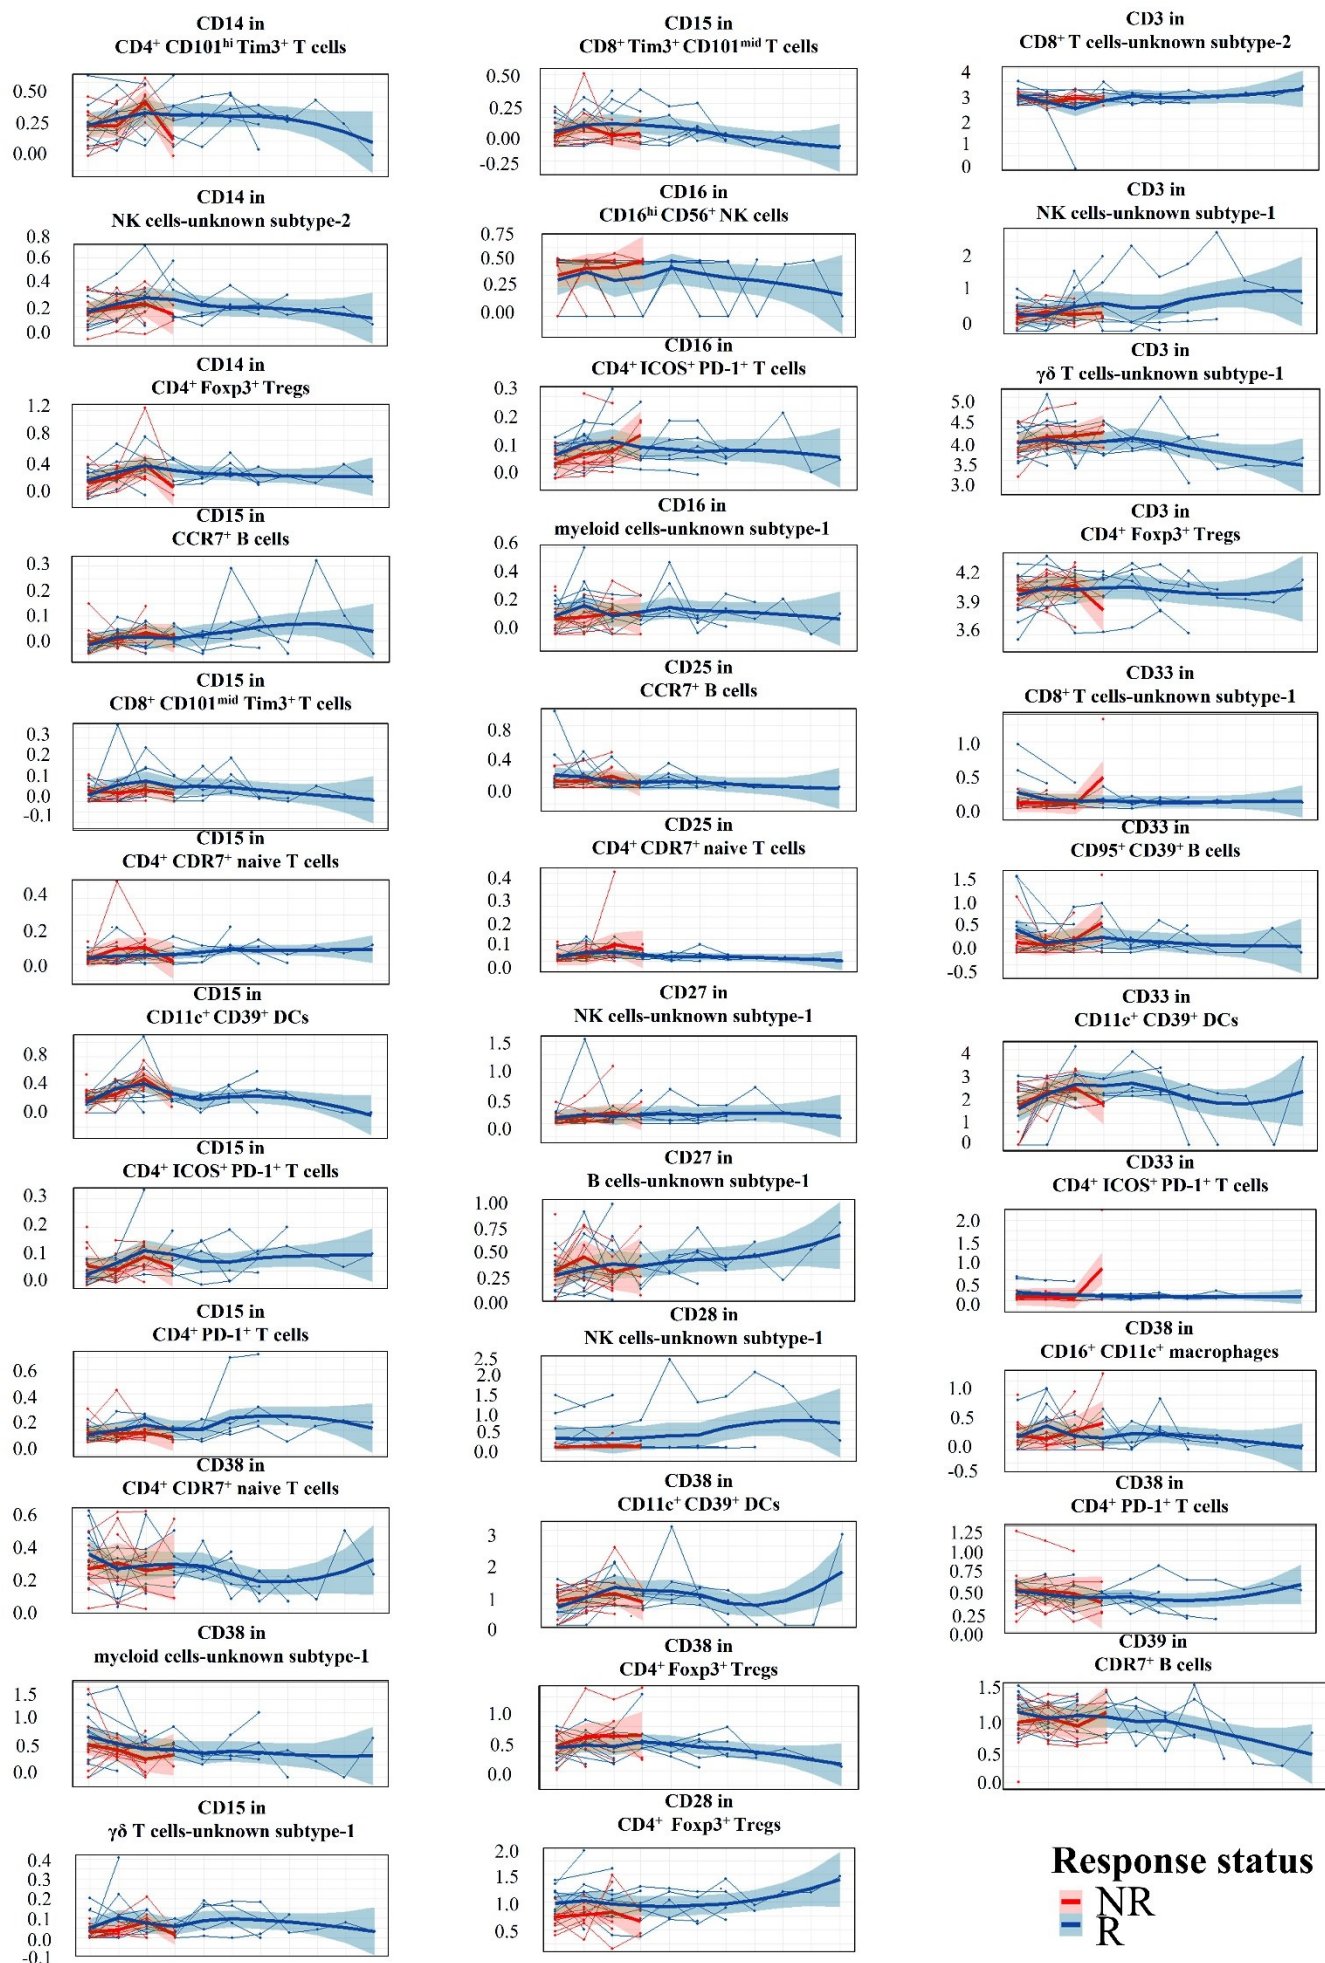

**Supplementary figure 17-2. Longitudinal behavior of antigens in different subsets of immune cells compared between responders (n=11) and non-responders (n=14).** Data in longitudinal analysis are presented as mean values +/- SD.

# Supplementary data

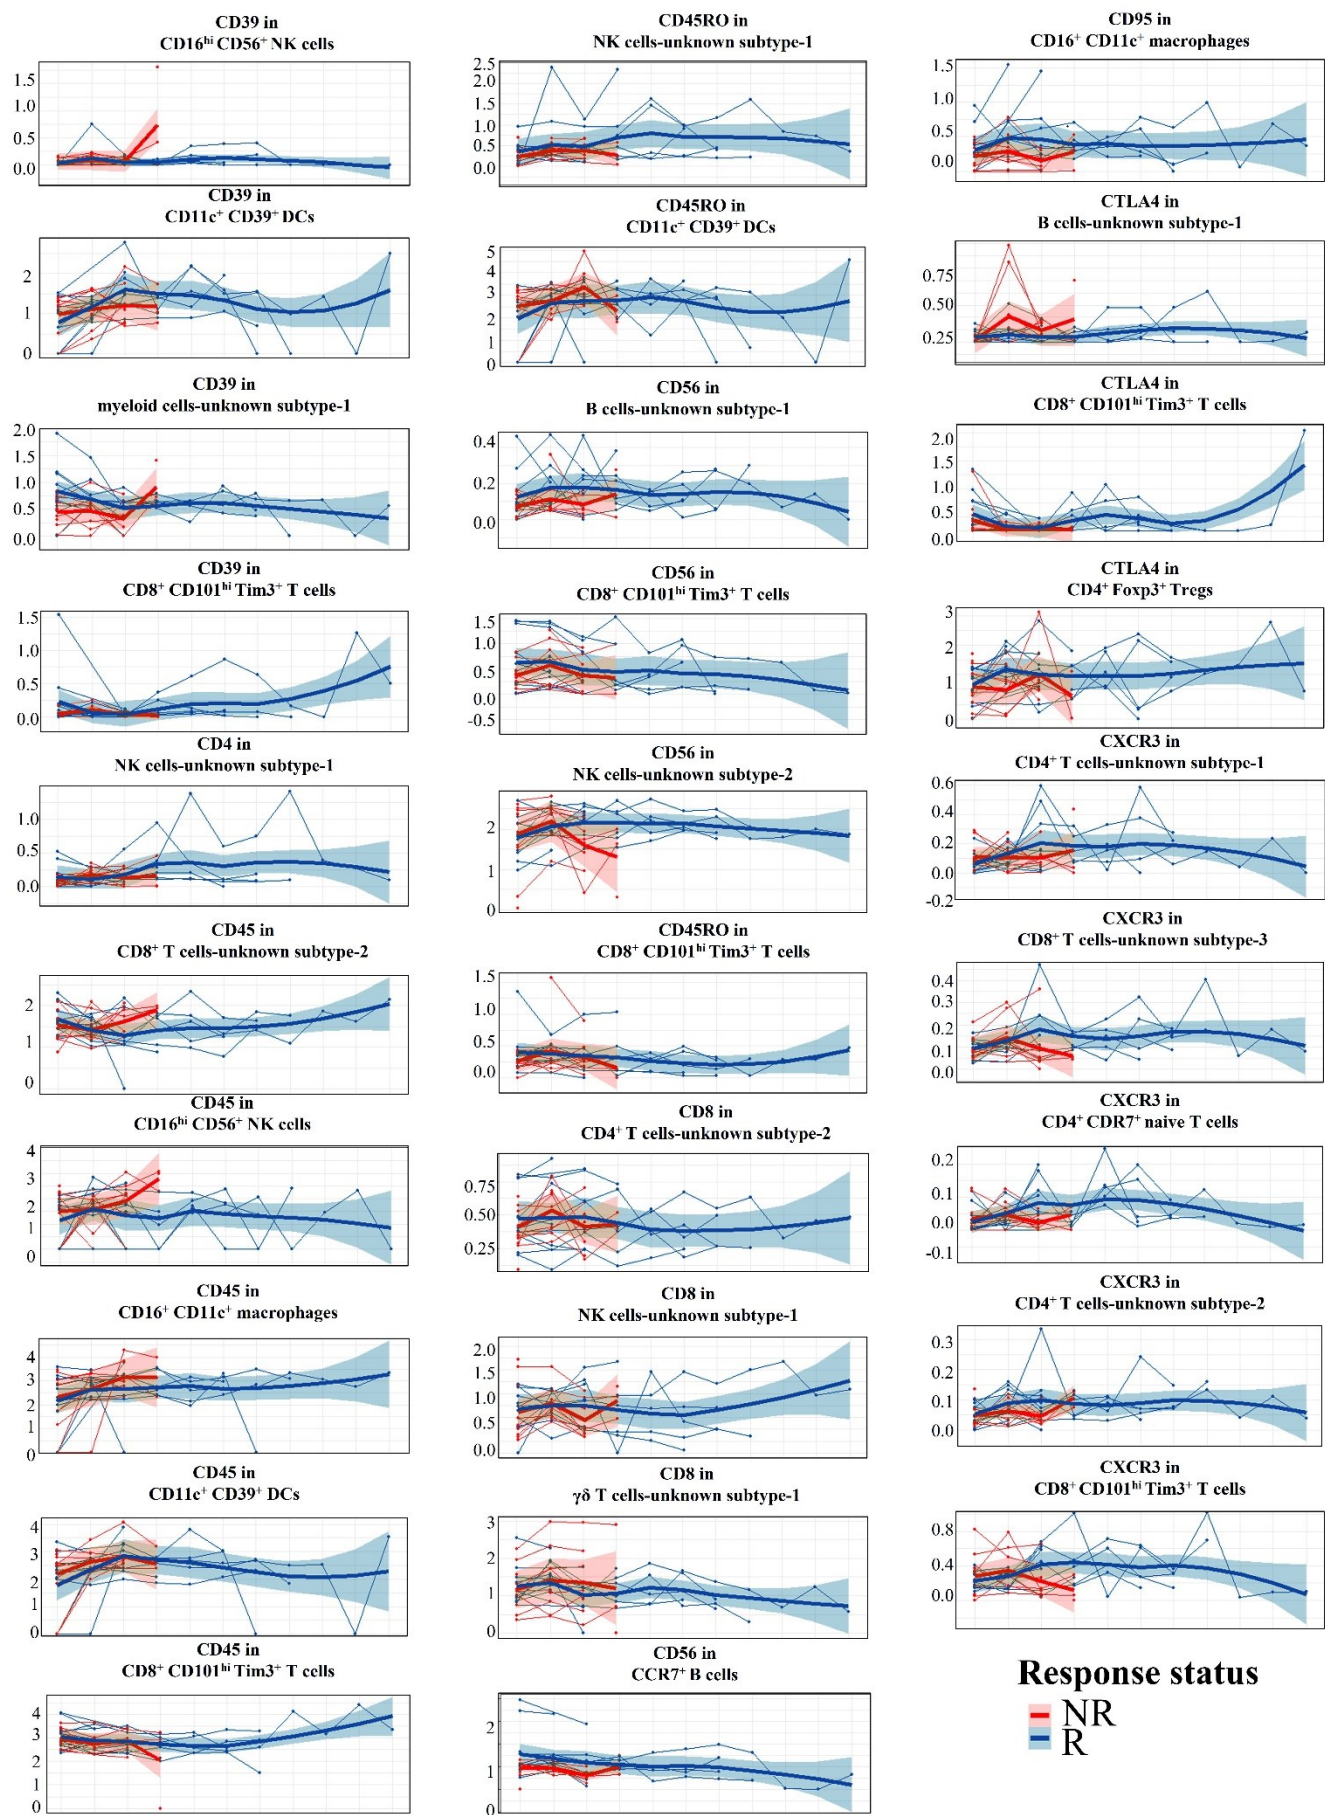

**Supplementary figure 17-3. Longitudinal behavior of antigens in different subsets of immune cells compared between responders (n=11) and non-responders (n=14). Data in longitudinal analysis are presented as mean values +/- SD.**



# Supplementary data

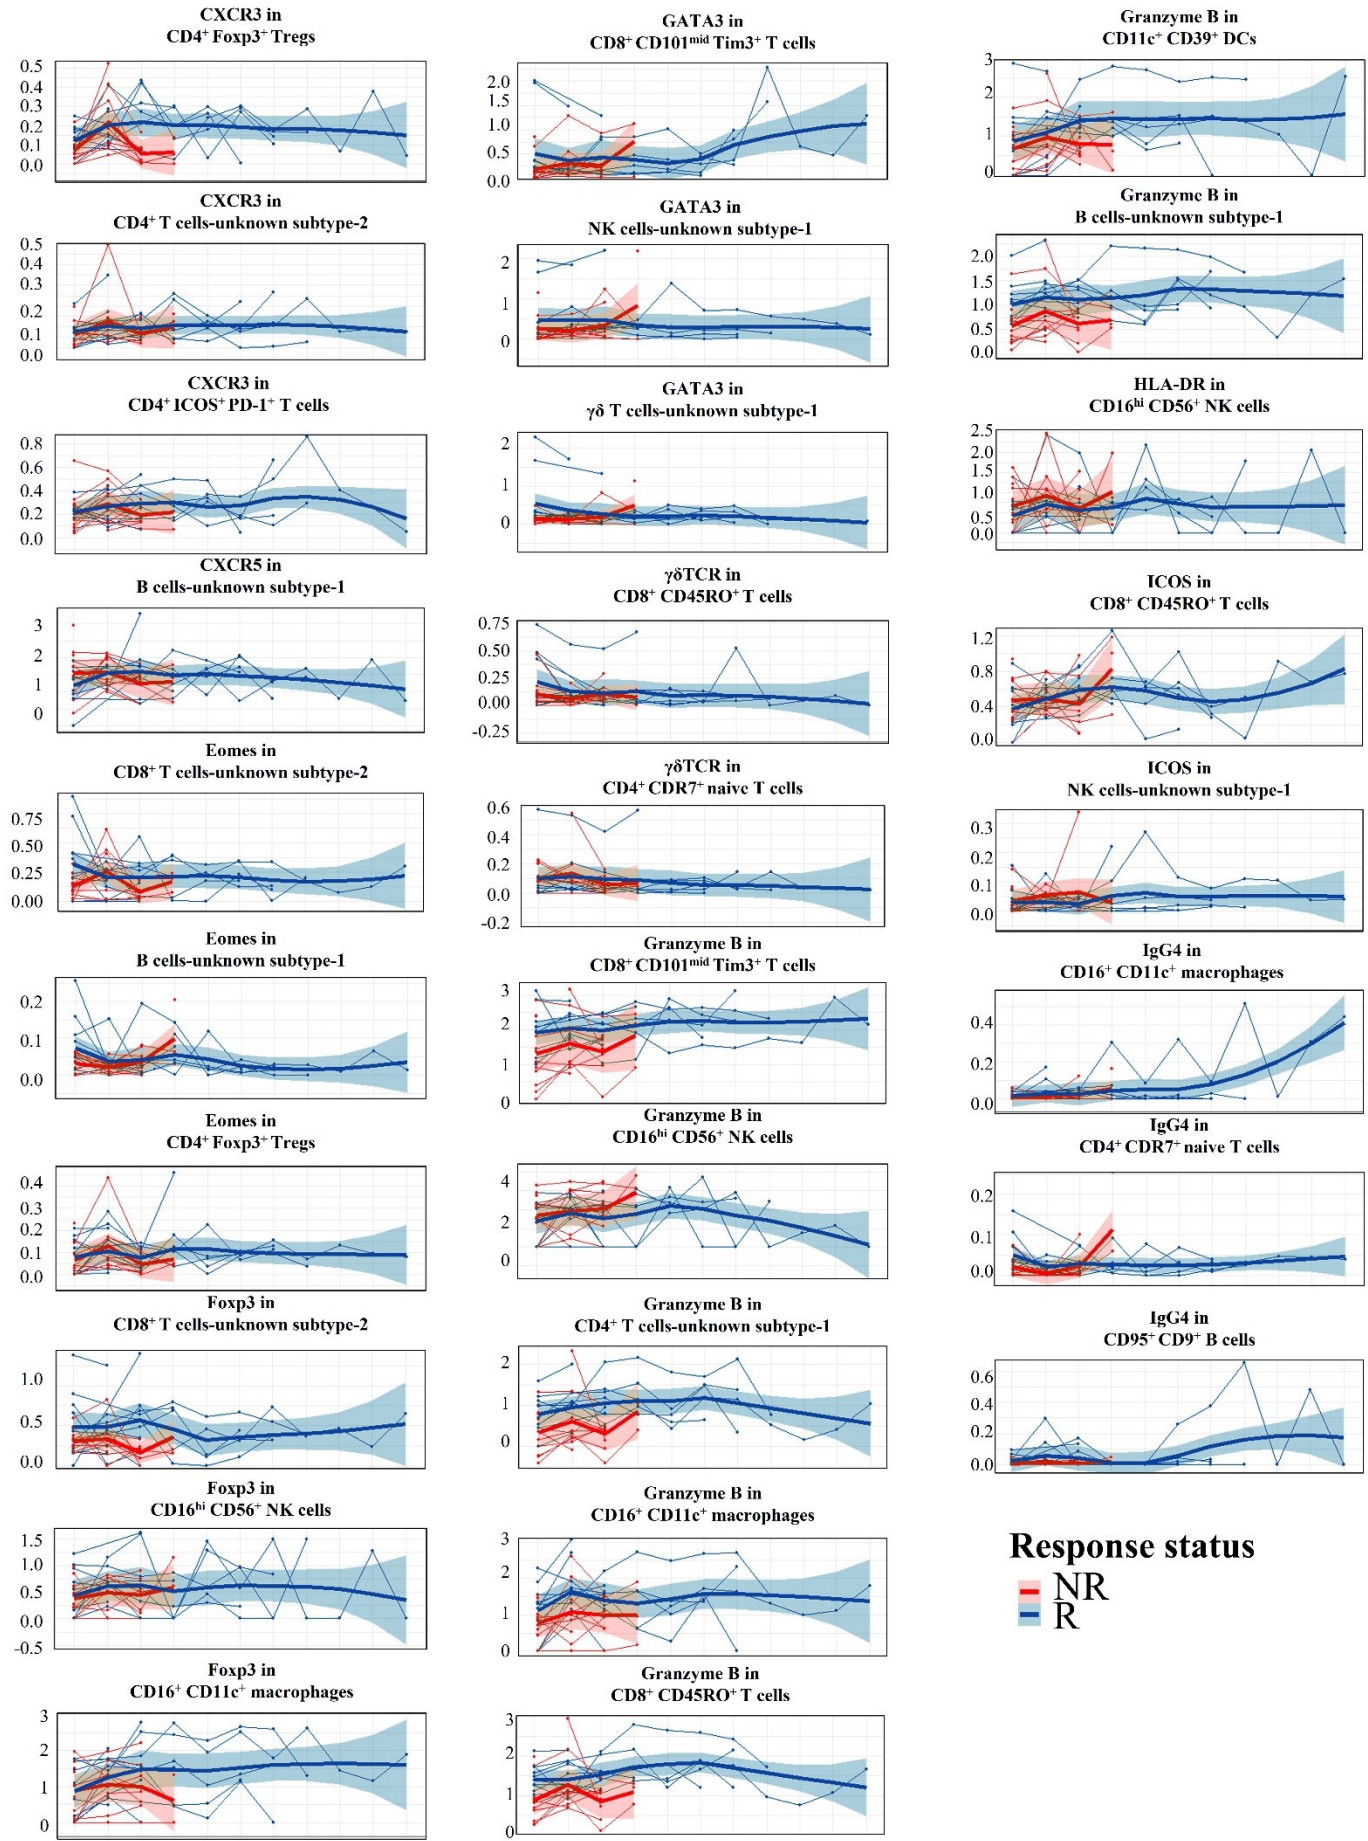

**Supplementary figure 17-4. Longitudinal behavior of antigens in different subsets of immune cells compared between responders (n=11) and non-responders (n=14).** Data in longitudinal analysis are presented as mean values +/- SD.

# Supplementary data

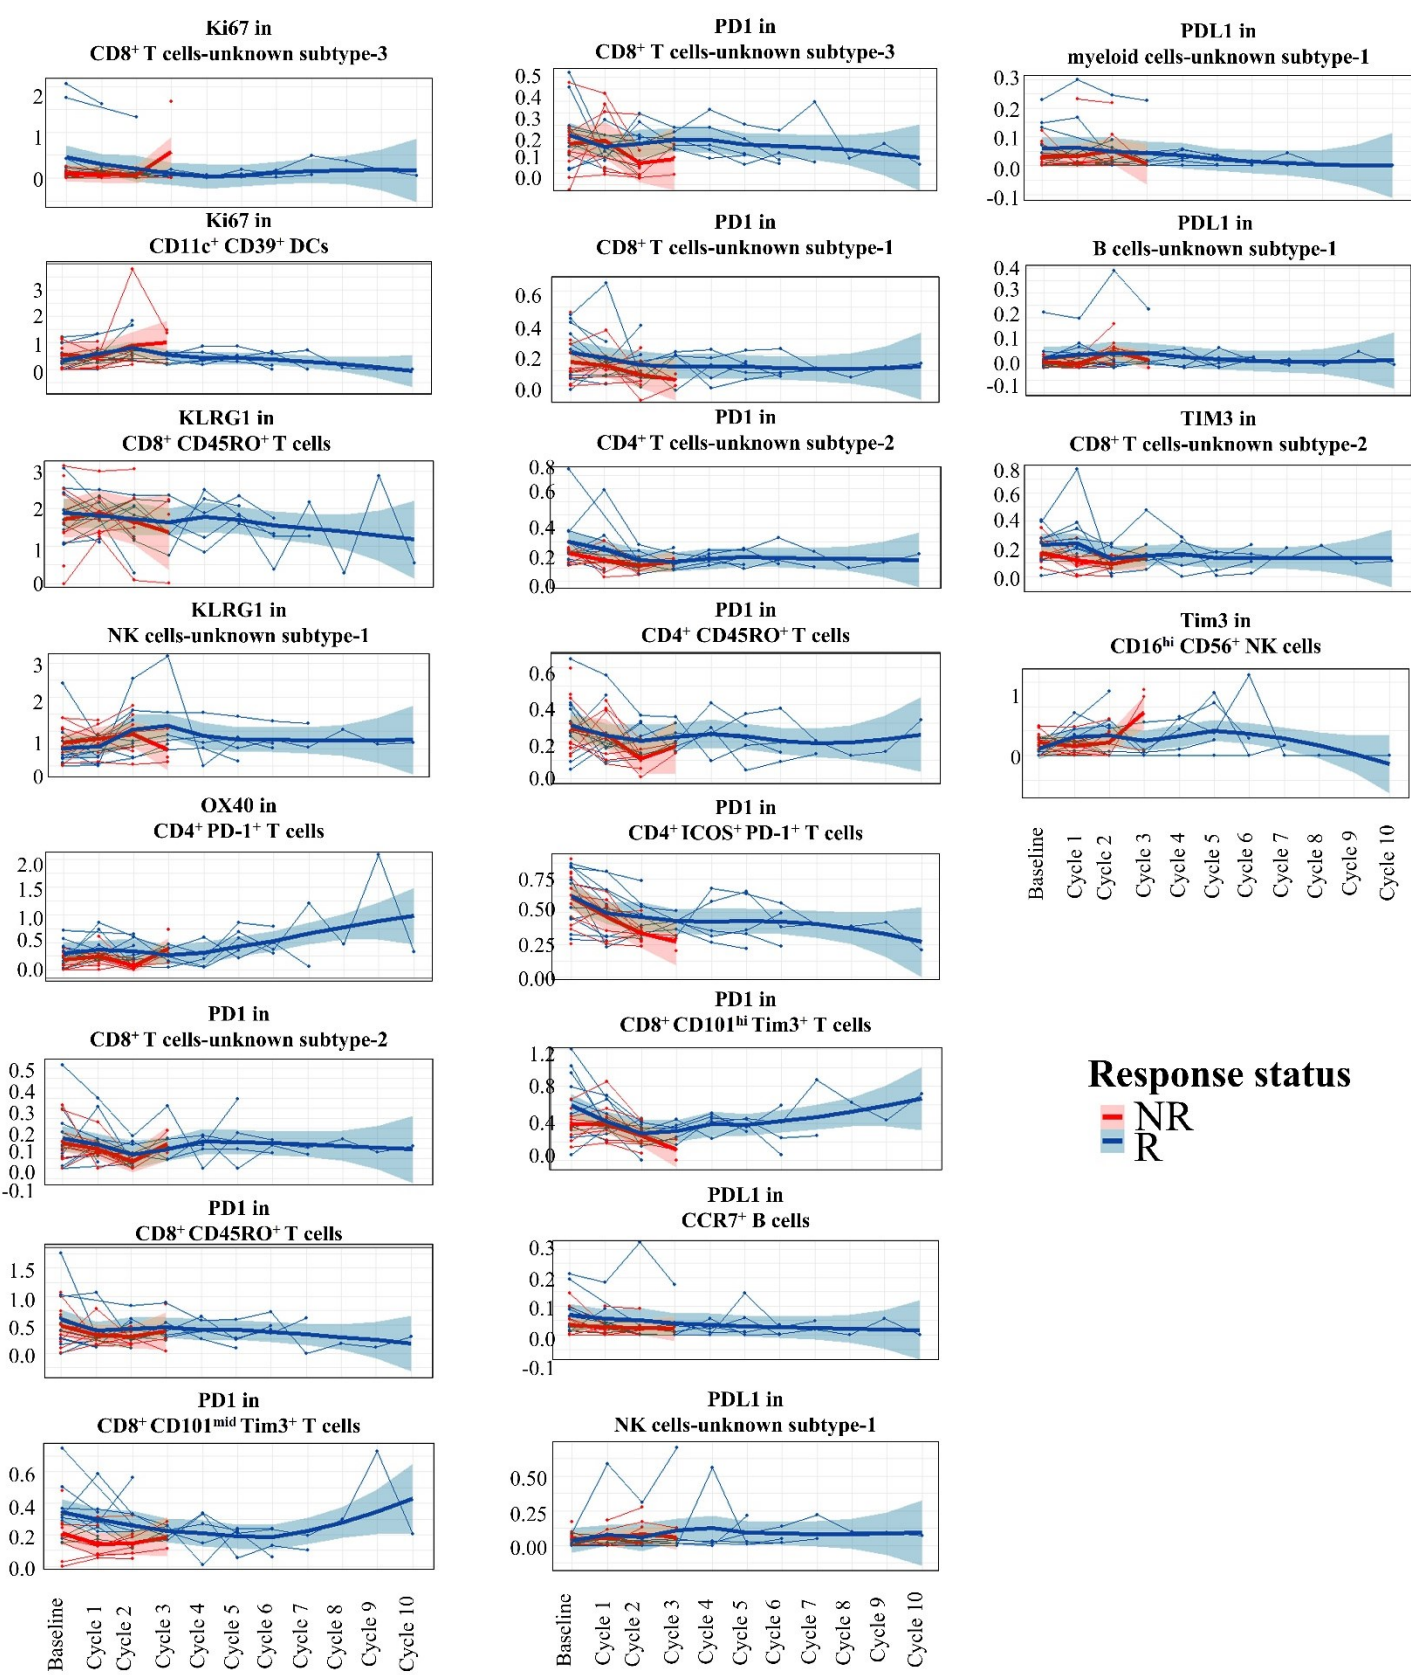

**Supplementary figure 17-5. Longitudinal behavior of antigens in different subsets of immune cells compared between responders (n=11) and non-responders (n=14). Data in longitudinal analysis are presented as mean values +/- SD.**

# Supplementary data

## MSD (P-value for R vs. NR t-test; FC) at baseline

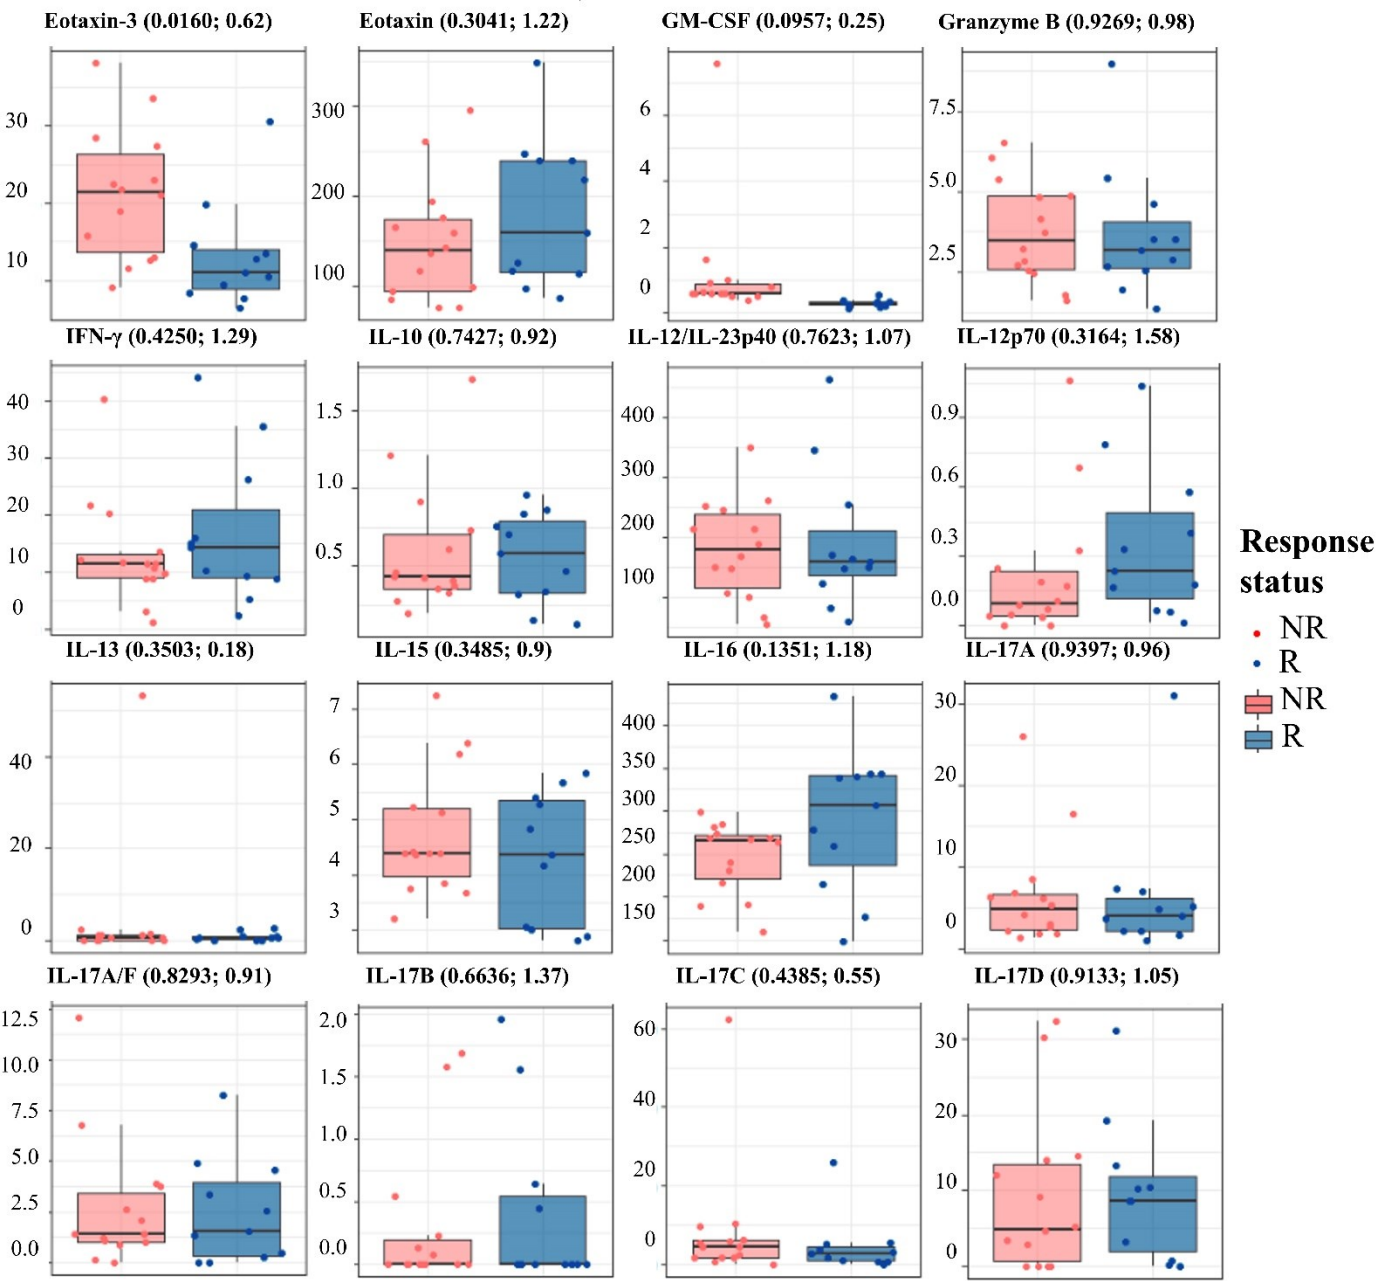

**Supplementary figure 18-1. Cytokine levels tested by MSD at baseline and compared between responders (n=11) and non-responders (n=14) in a cohort of NSCLC patients receiving anti-PD-1 treatment.** The box plots represent the interquartile range (IQR), with the horizontal line indicating the median. The whiskers extend to the farthest data point within a maximum of  $1.5 \times \text{IQR}$ . All *p*-values were calculated using two-sided t-tests comparing the R to the NR and were corrected for multiple comparisons using the Benjamini-Hochberg adjustment.



# Supplementary data

## MSD (P-value for R vs. NR t-test; FC) at baseline

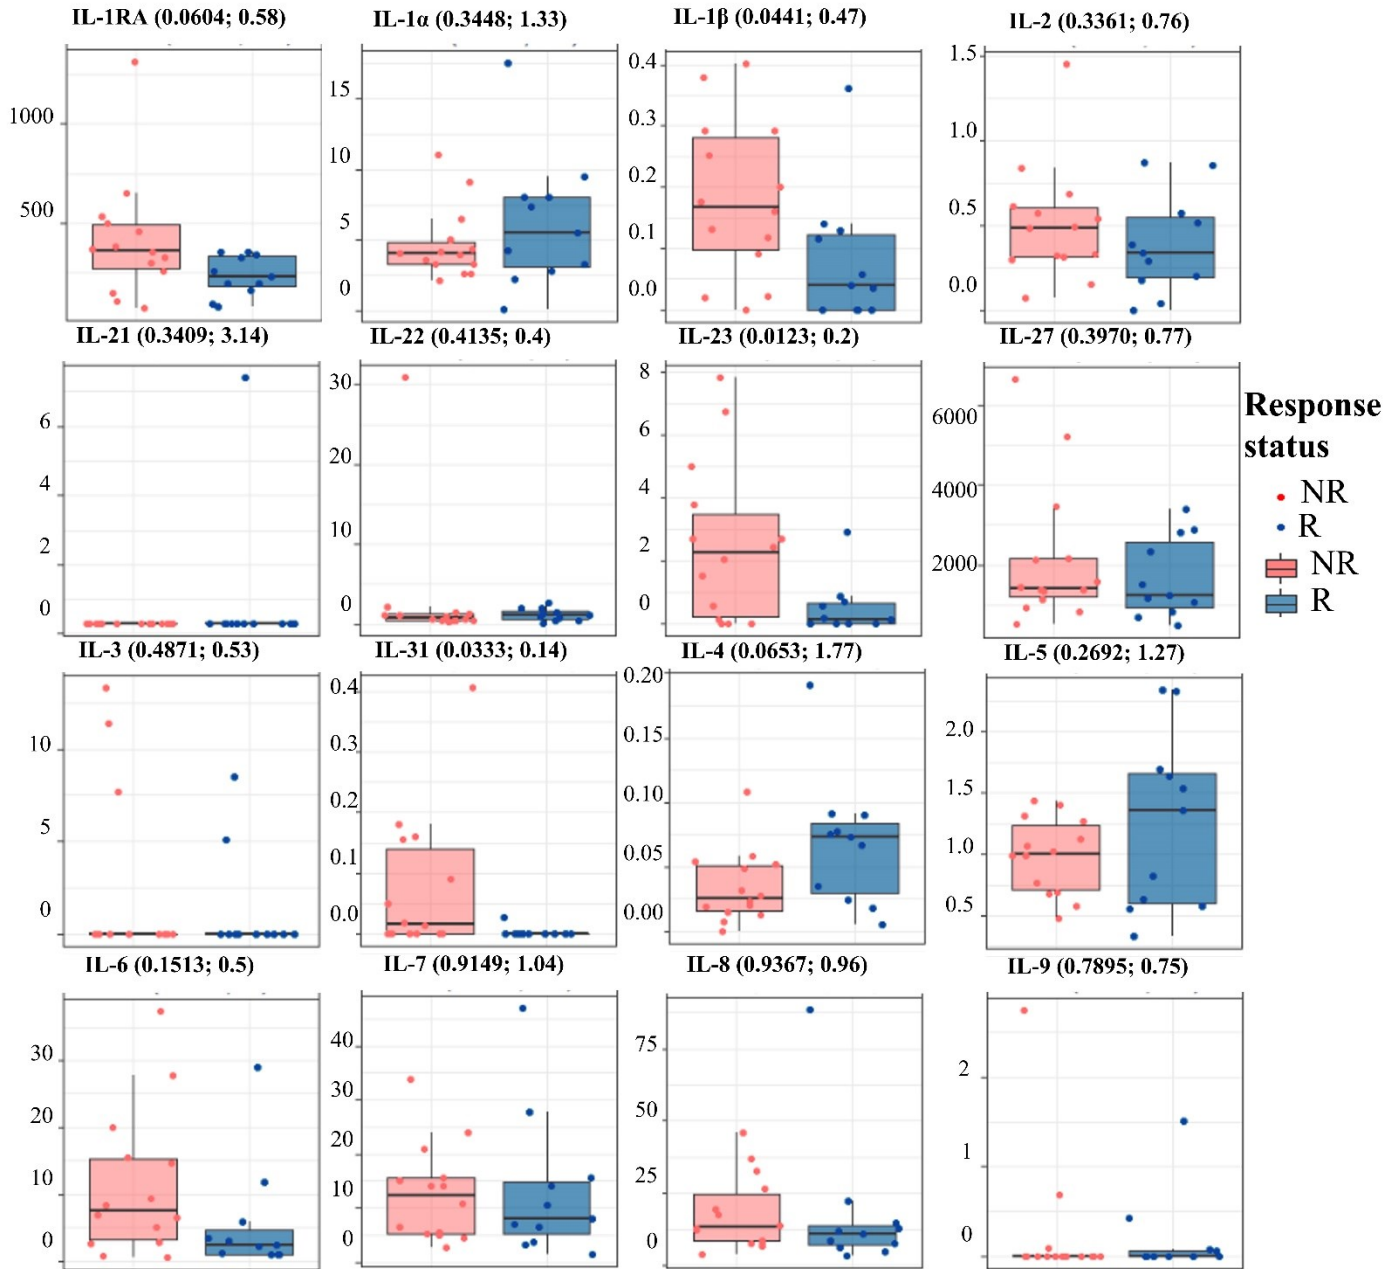

**Supplementary figure 18-2. Cytokine levels tested by MSD at baseline and compared between responders (n=11) and non-responders (n=14) in a cohort of NSCLC patients receiving anti-PD-1 treatment.** The box plots represent the interquartile range (IQR), with the horizontal line indicating the median. The whiskers extend to the farthest data point within a maximum of  $1.5 \times \text{IQR}$ . All *p-values* were calculated using two-sided t-tests comparing the R to the NR and were corrected for multiple comparisons using the Benjamini-Hochberg adjustment.

# Supplementary data

## MSD (P-value for R vs. NR t-test; FC) at baseline

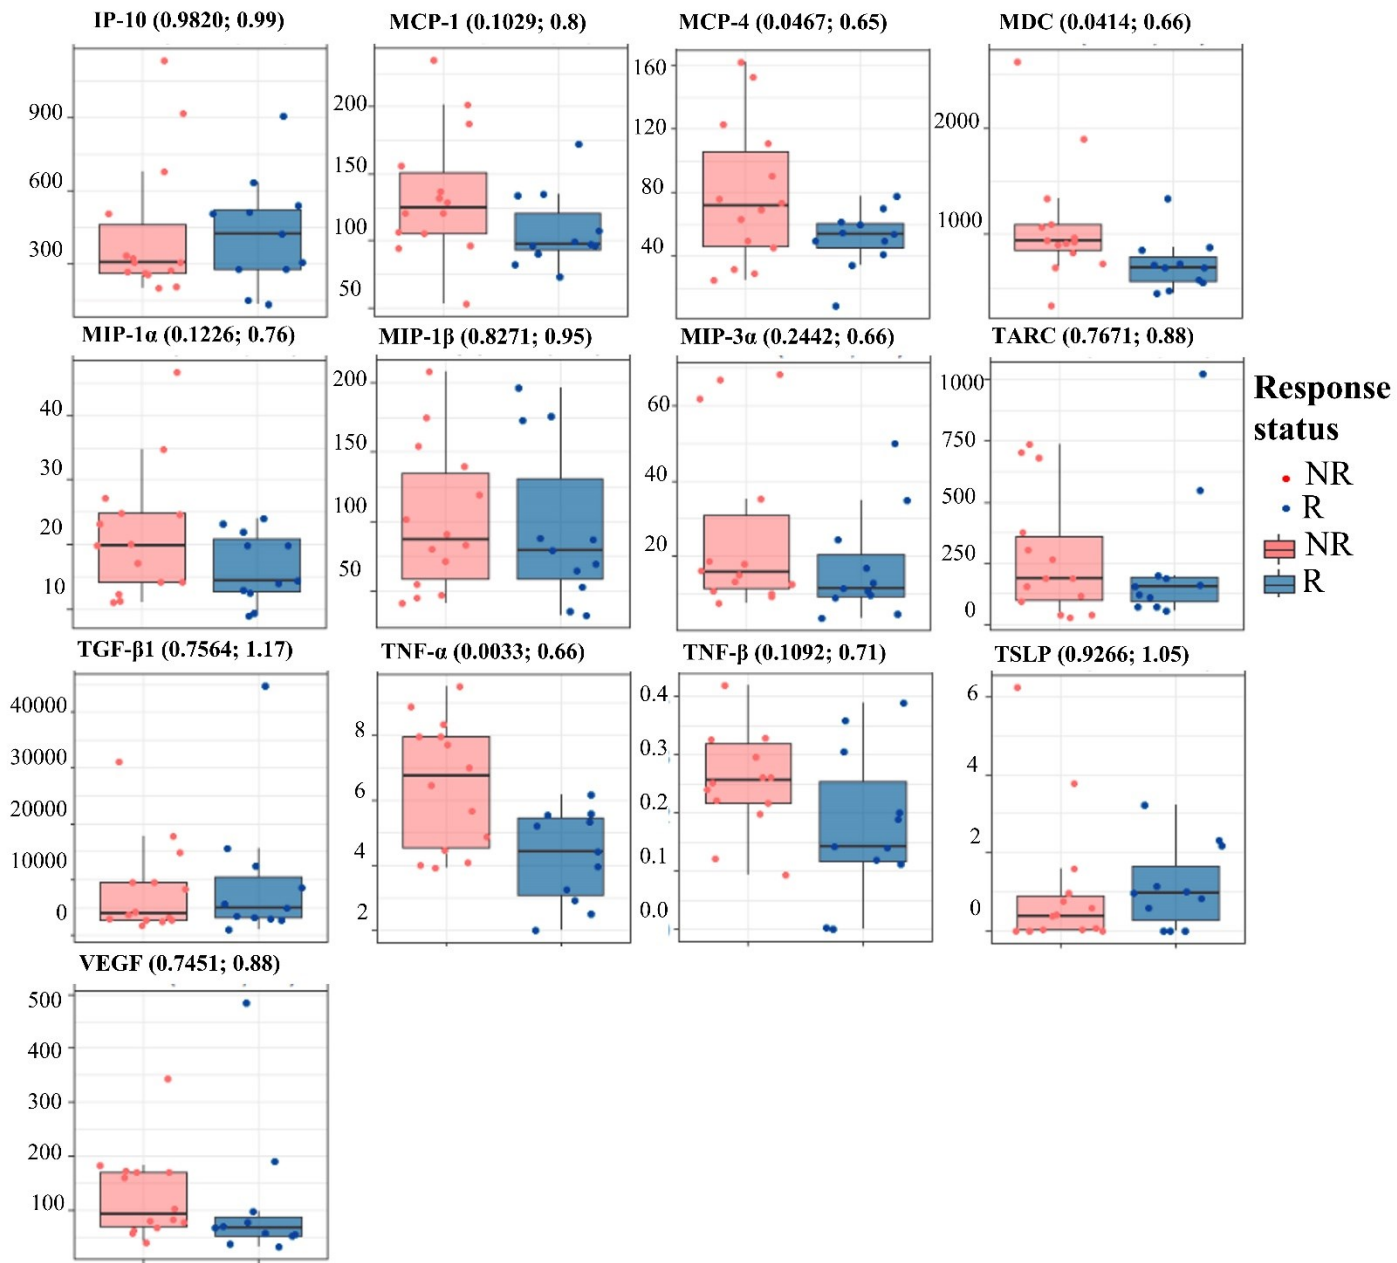

**Supplementary figure 18-3. Cytokine levels tested by MSD at baseline and compared between responders (n=11) and non-responders (n=14) in a cohort of NSCLC patients receiving anti-PD-1 treatment.** The box plots represent the interquartile range (IQR), with the horizontal line indicating the median. The whiskers extend to the farthest data point within a maximum of  $1.5 \times \text{IQR}$ . All *p*-values were calculated using two-sided t-tests comparing the R to the NR and were corrected for multiple comparisons using the Benjamini-Hochberg adjustment.



# Supplementary data

## Cytokine level by MSD (P-value for R vs NR)

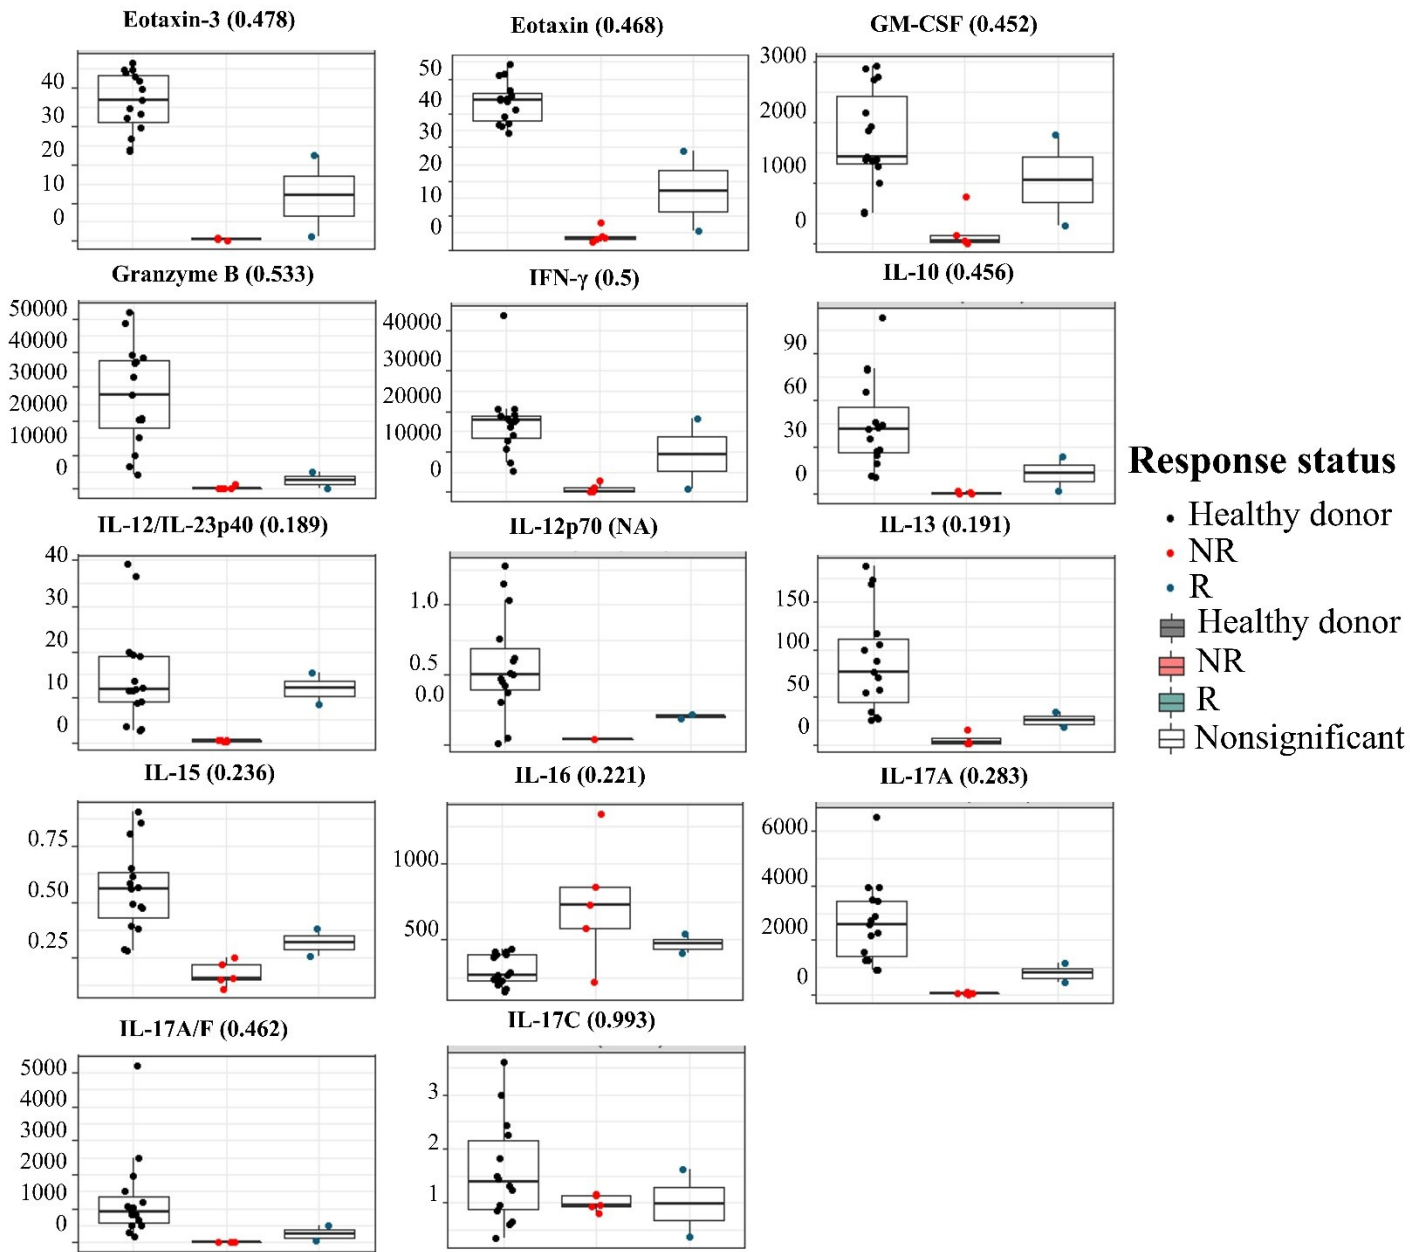

**Supplementary figure 19-1. Cytokine levels tested by MSD after T cell stimulation and compared among healthy donors (n=16) and responders (n=11) and non-responders (n=14) in a cohort of NSCLC patients receiving anti-PD-1 treatment.** The box plots represent the interquartile range (IQR), with the horizontal line indicating the median. The whiskers extend to the farthest data point within a maximum of  $1.5 \times \text{IQR}$ . All *p*-values were calculated using two-sided t-tests comparing patients to the HDs and were corrected for multiple comparisons using the Benjamini-Hochberg adjustment.

# Supplementary data

## Cytokine level by MSD (P-value for R vs NR)

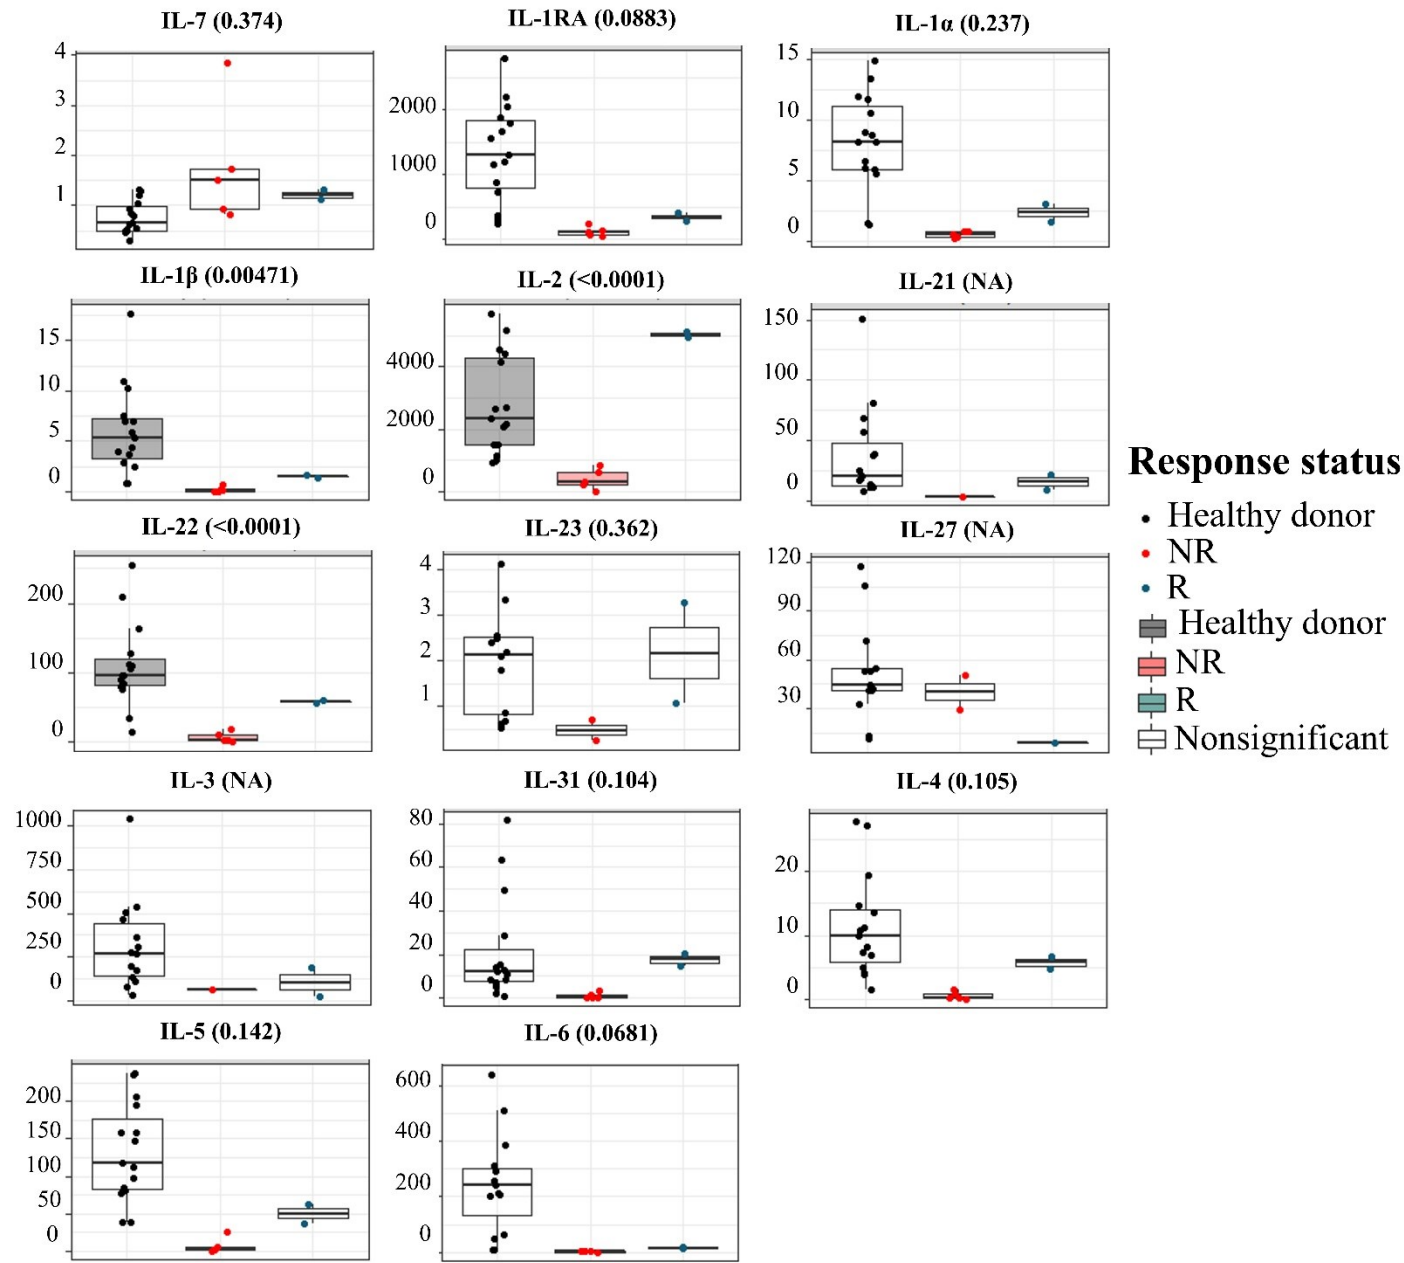

**Supplementary figure 19-2. Cytokine levels tested by MSD after T cell stimulation and compared among healthy donors (n=16) and responders (n=11) and non-responders (n=14) in a cohort of NSCLC patients receiving anti-PD-1 treatment.** The box plots represent the interquartile range (IQR), with the horizontal line indicating the median. The whiskers extend to the farthest data point within a maximum of  $1.5 \times \text{IQR}$ . All *p*-values were calculated using two-sided t-tests comparing patients to the HDs and were corrected for multiple comparisons using the Benjamini-Hochberg adjustment.

# Supplementary data

## Cytokine level by MSD (P-value for R vs NR)

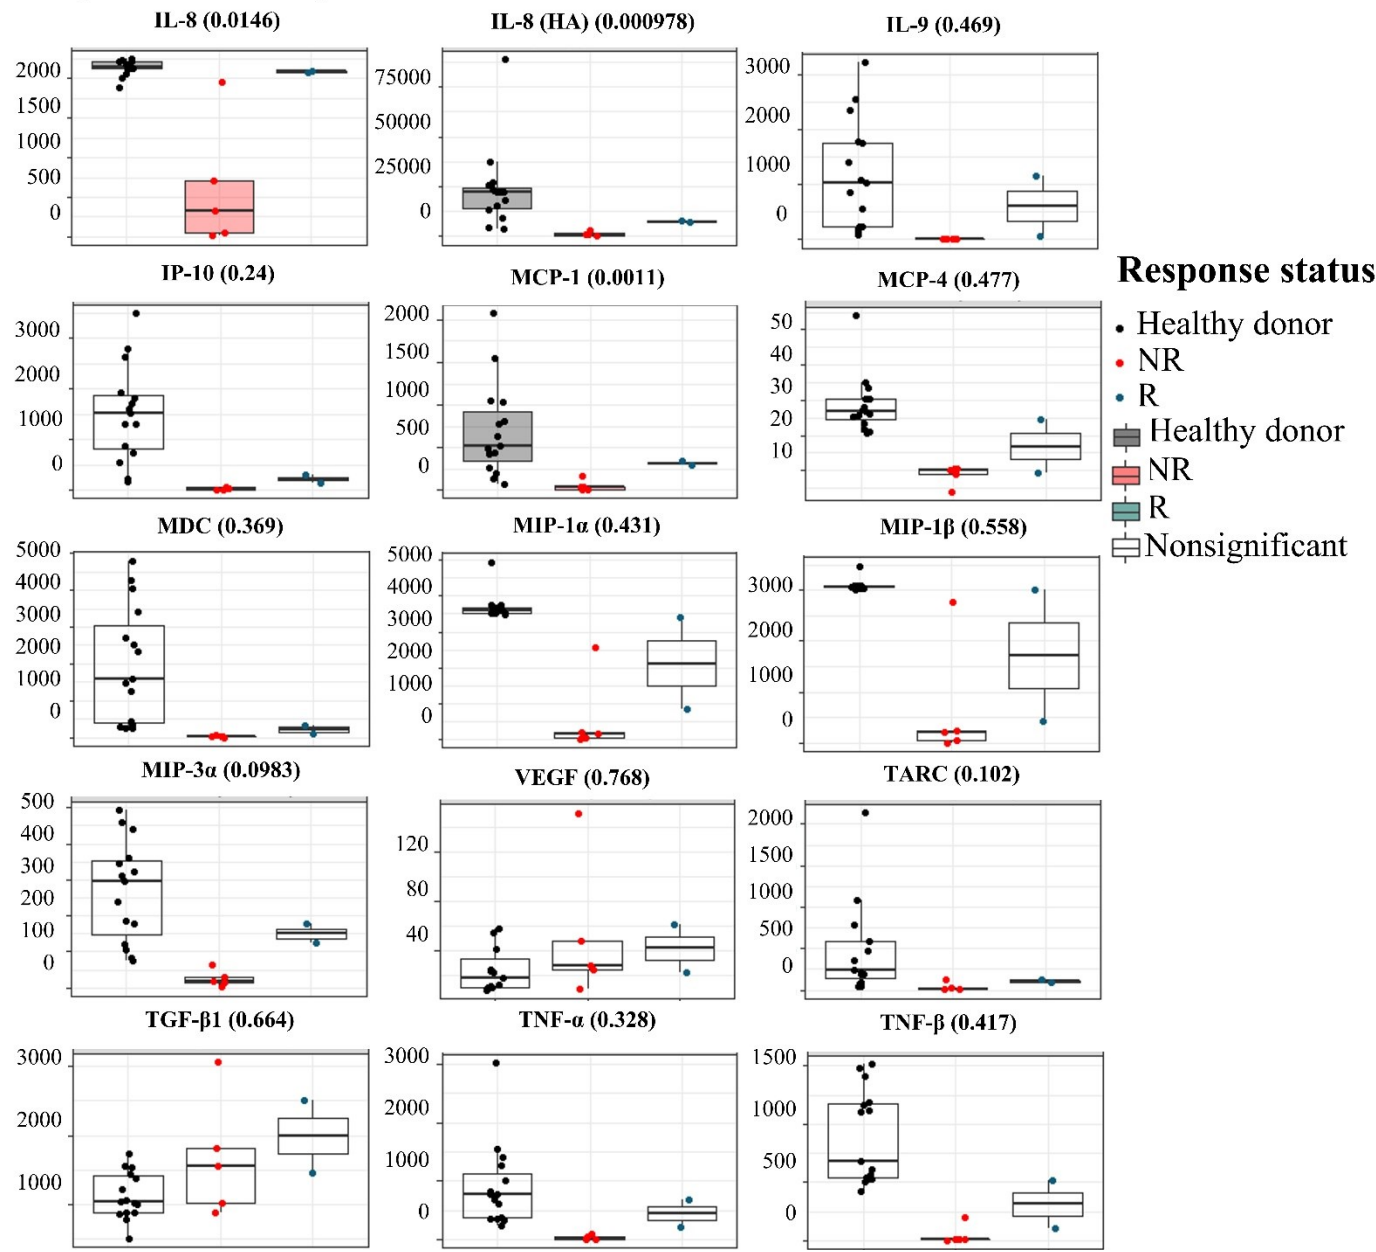

**Supplementary figure 19-3. Cytokine levels tested by MSD after T cell stimulation and compared among healthy donors (n=16) and responders (n=11) and non-responders (n=14) in a cohort of NSCLC patients receiving anti-PD-1 treatment.** The box plots represent the interquartile range (IQR), with the horizontal line indicating the median. The whiskers extend to the farthest data point within a maximum of  $1.5 \times \text{IQR}$ . All *p*-values were calculated using two-sided t-tests comparing patients to the HDs and were corrected for multiple comparisons using the Benjamini-Hochberg adjustment.

# Supplementary data-Correlations between cytokines and immune cell types

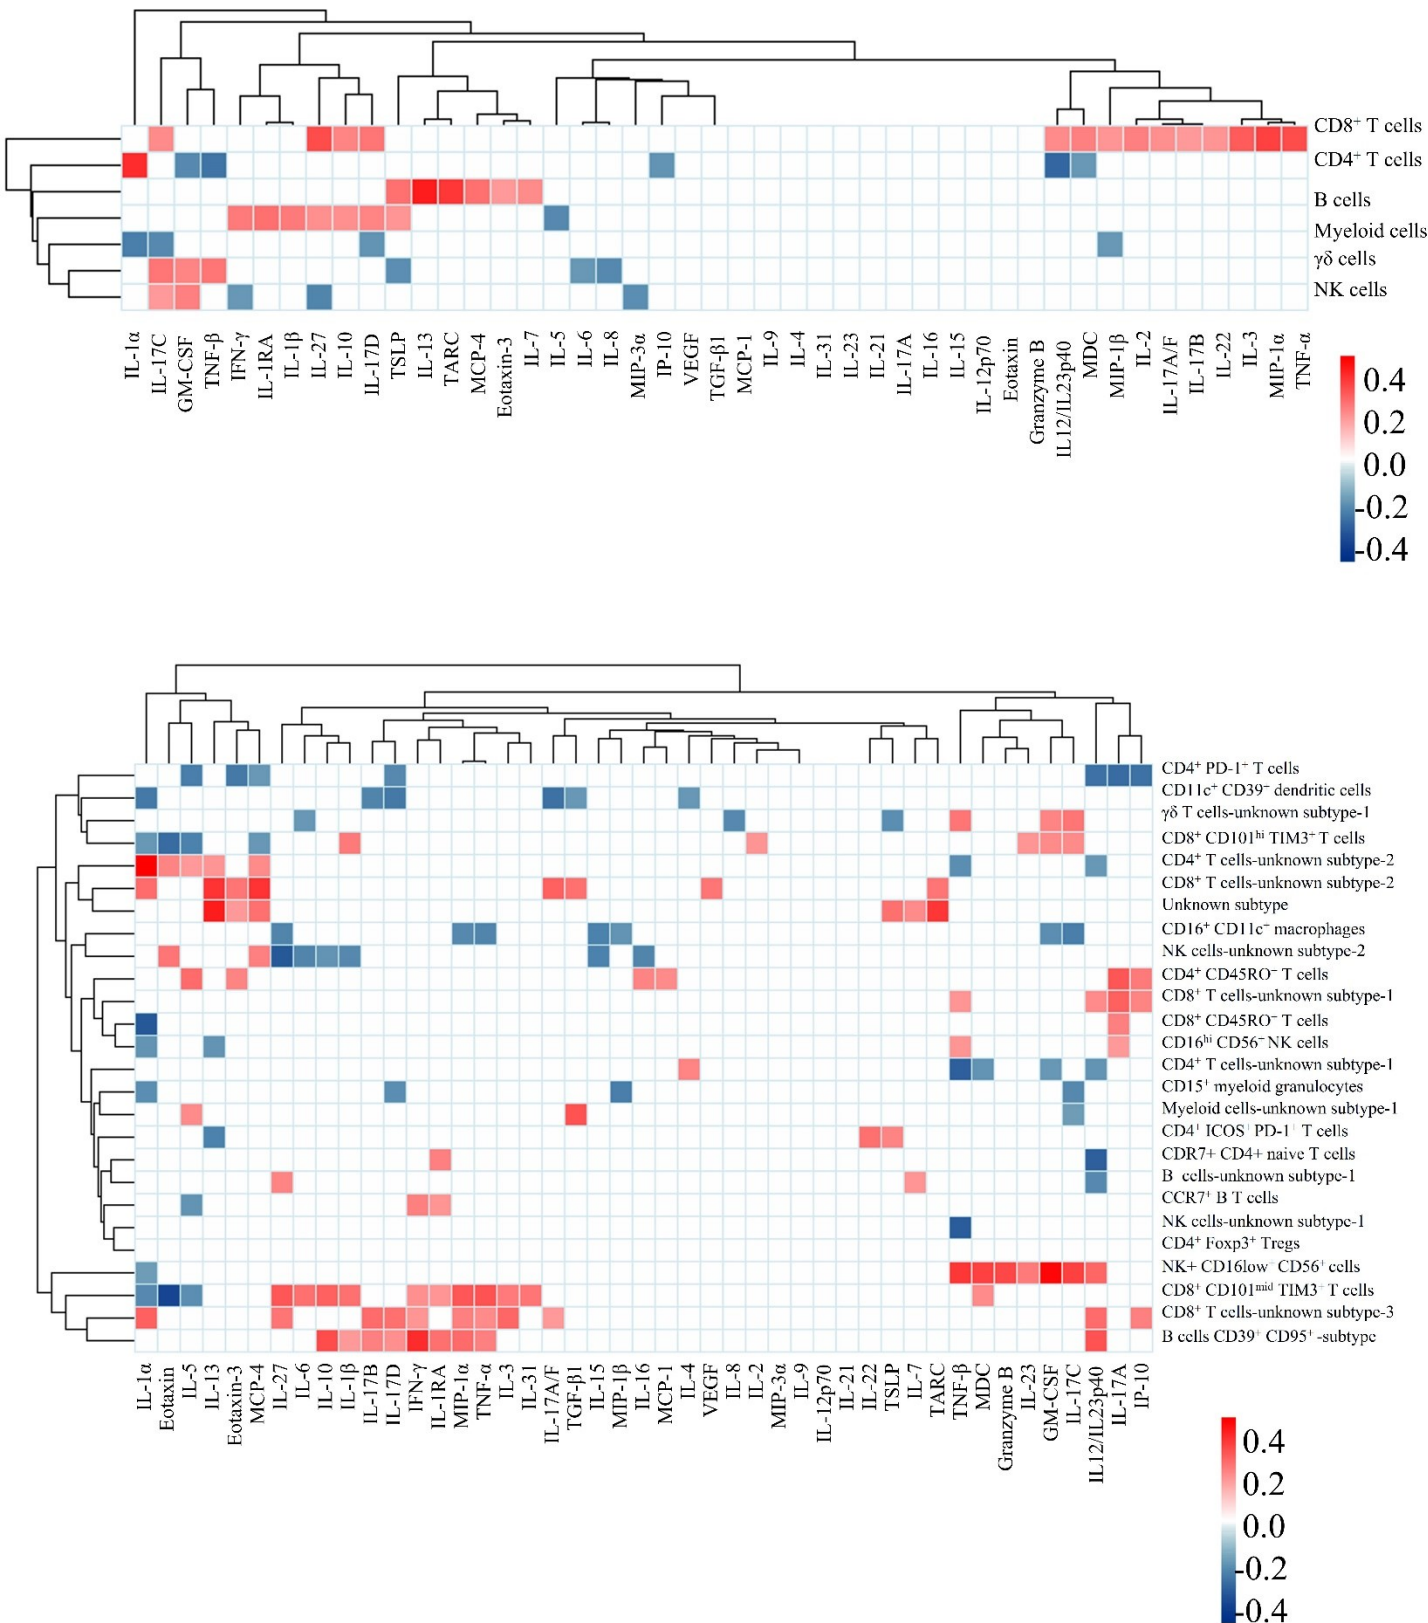

**Supplementary figure 20. Heatmap of Pearson correlation coefficient (PCC) values, indicating the correlations between different immune cell types and levels of cytokines in patients. A PCC value larger than 0 indicates a positive relationship. A value less than 0 indicates a negative relationship. If the value equals 0, the correlation between the two objects was not statistically significant.**



# Supplementary data

## Cytokine level by MSD

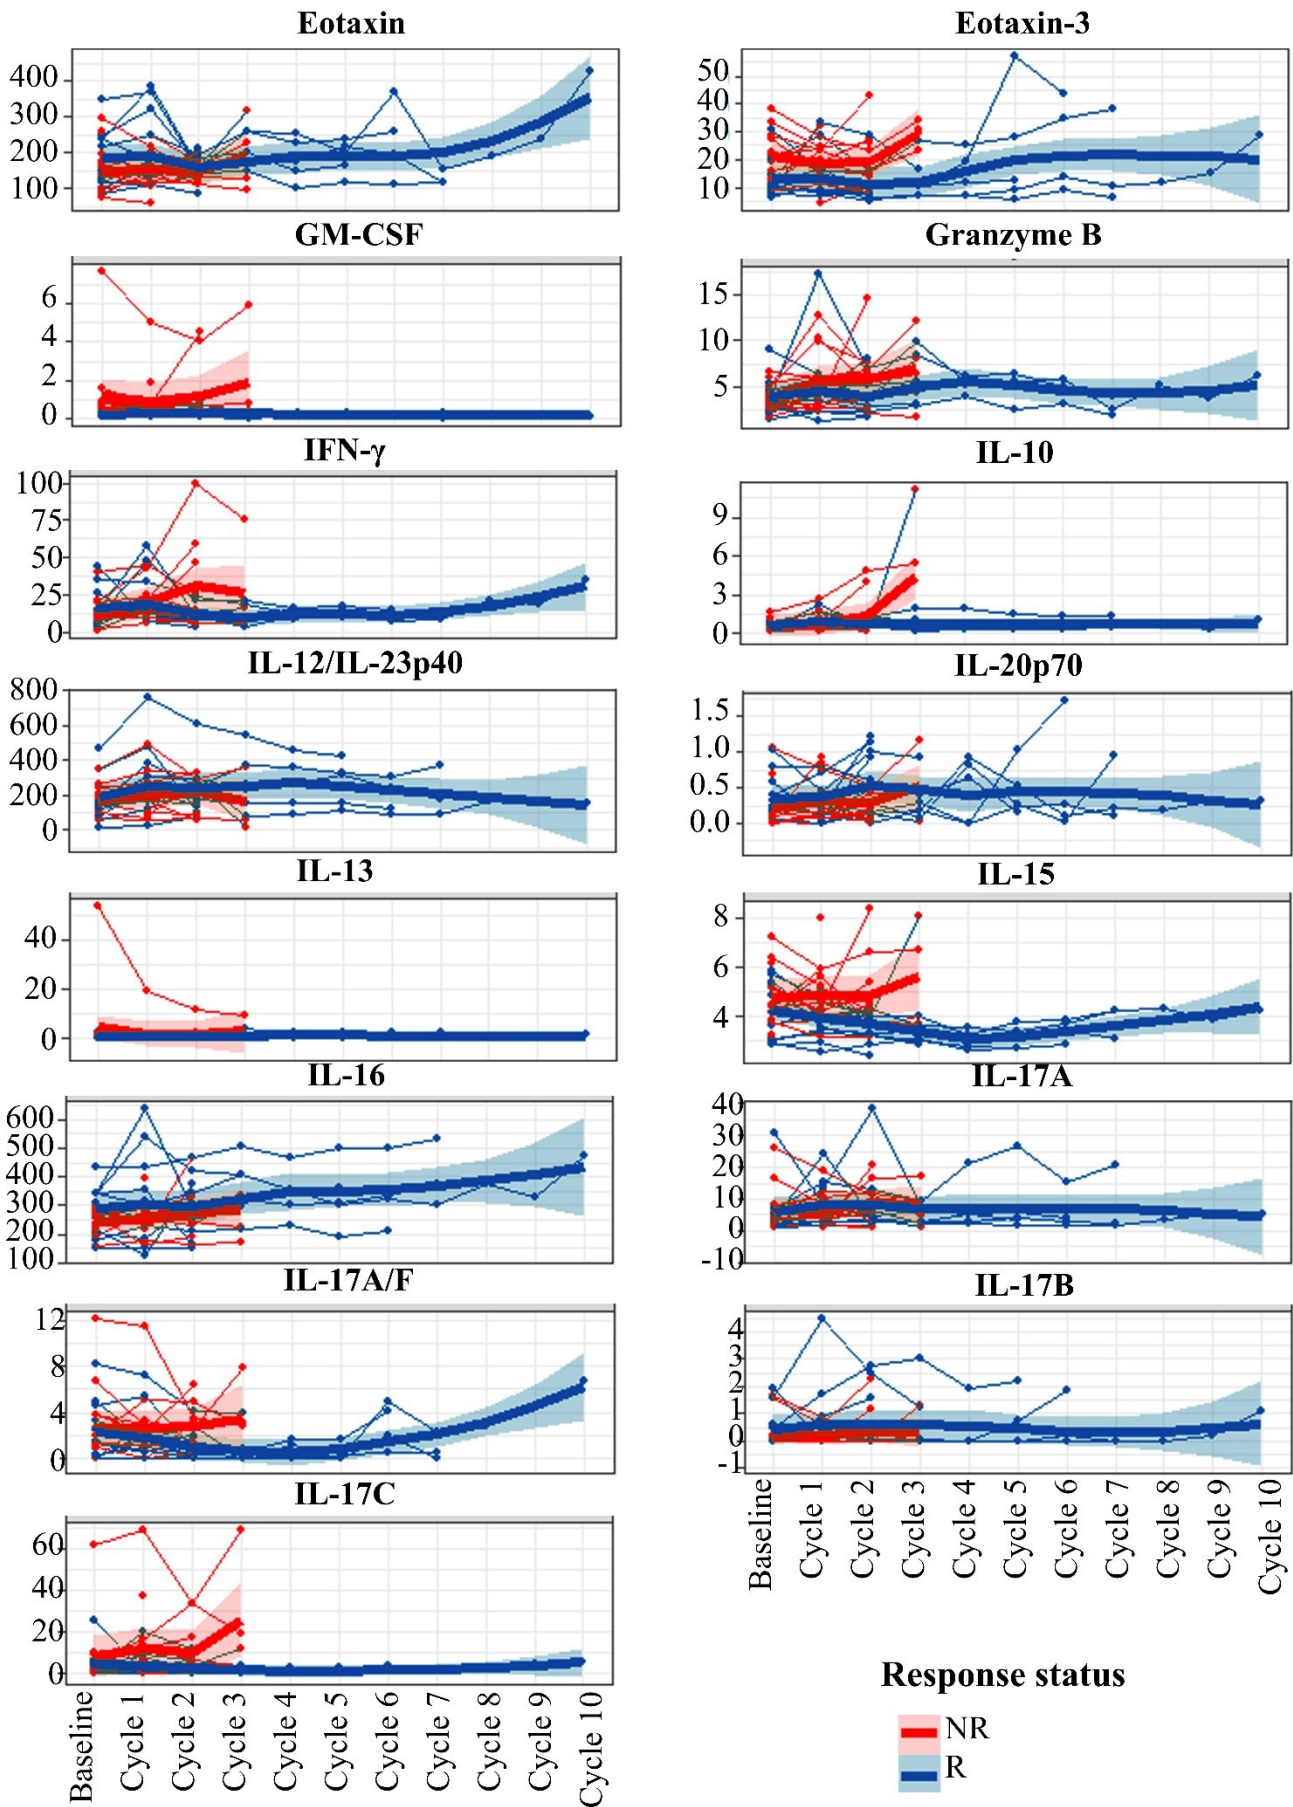

**Supplementary figure 21-1. Examples of the longitudinal behavior of cytokines under unstimulated conditions compared between responders and non-responders. Data in longitudinal analysis are presented as mean values  $\pm$  SD.**

# Supplementary data

## Cytokine level by MSD

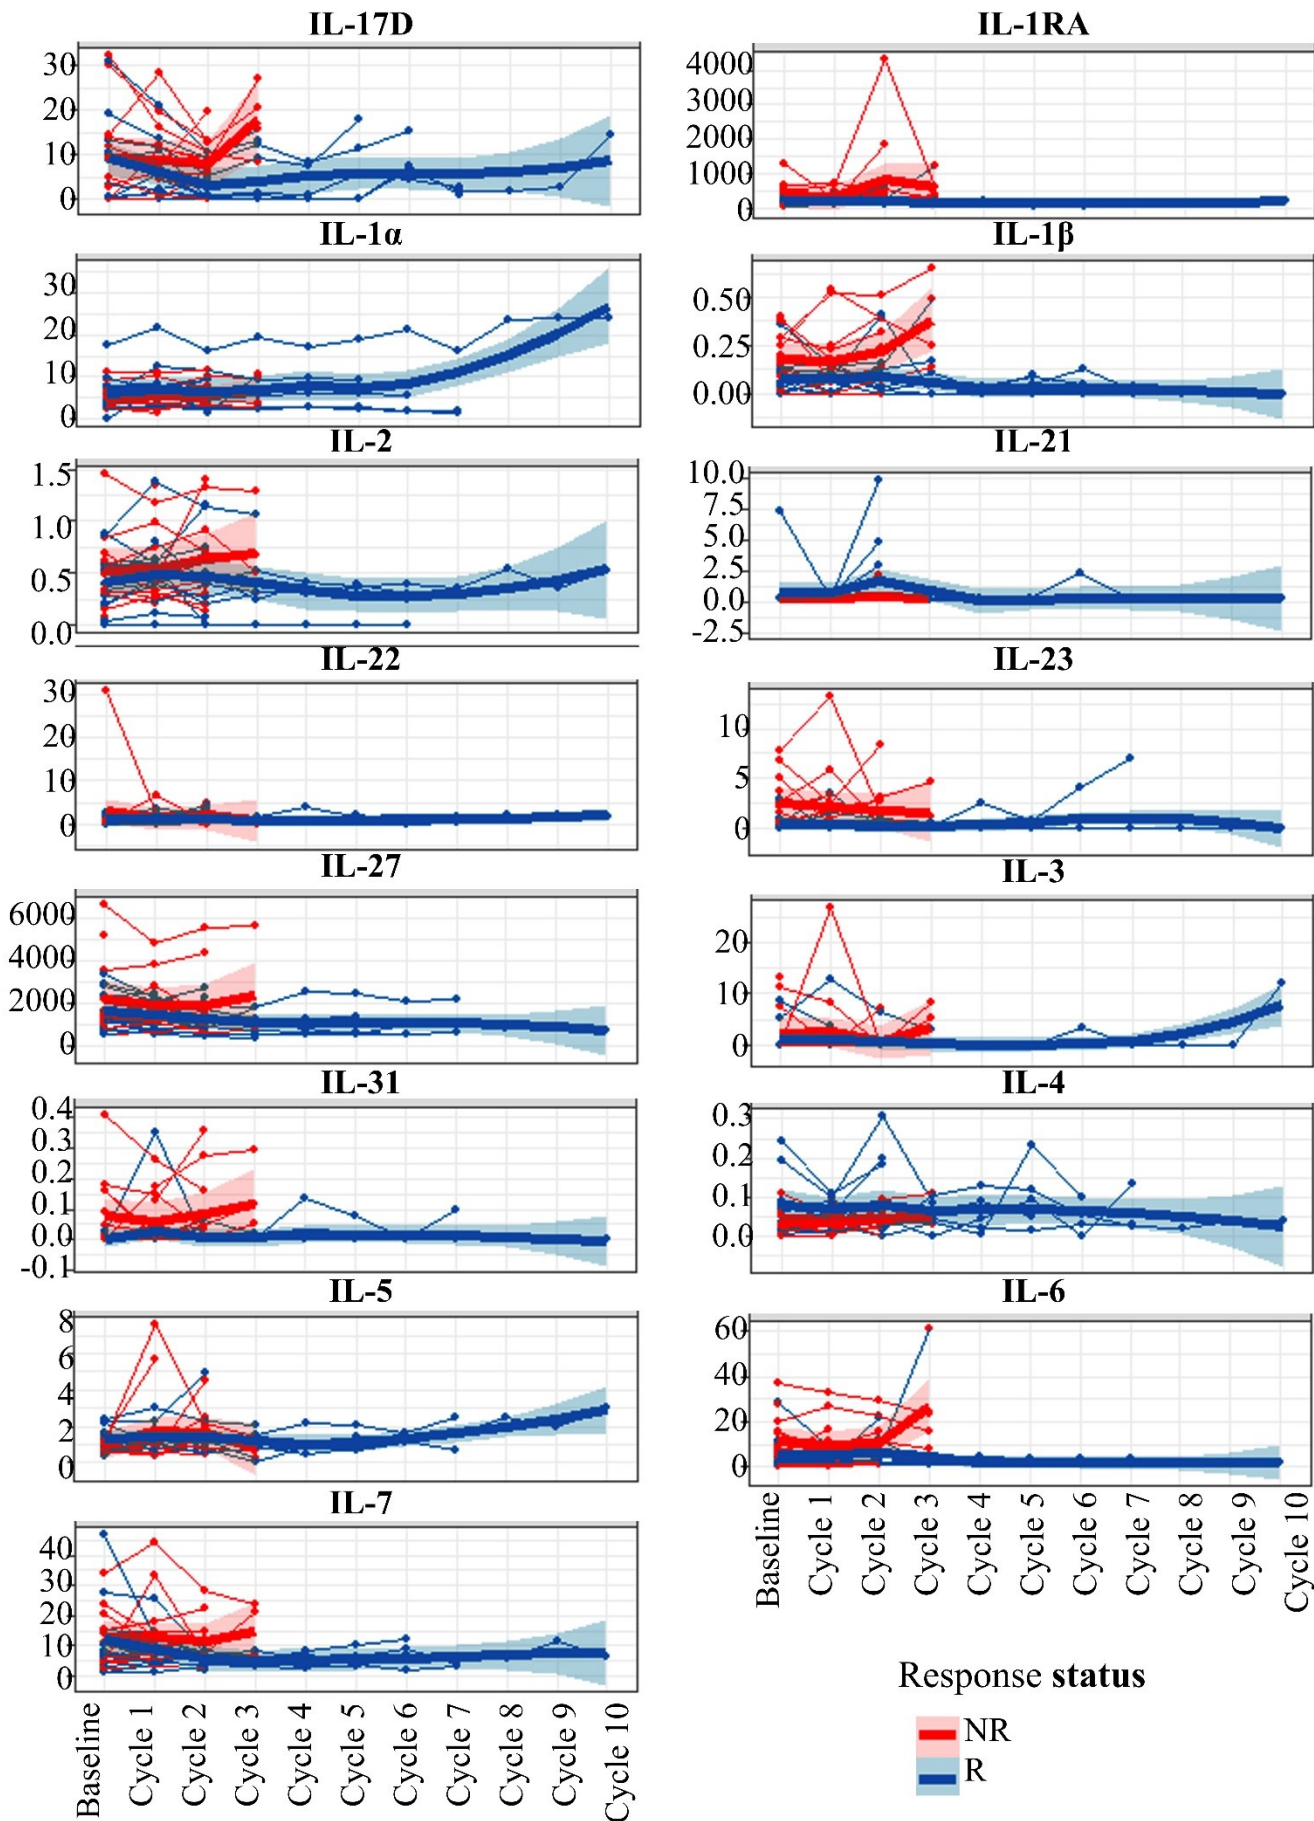

Supplementary figure 21-2. Examples of the longitudinal behavior of cytokines under unstimulated conditions compared between responders and non-responders. Data in longitudinal analysis are presented as mean values  $\pm$  SD.



# Supplementary data

## Cytokine level by MSD

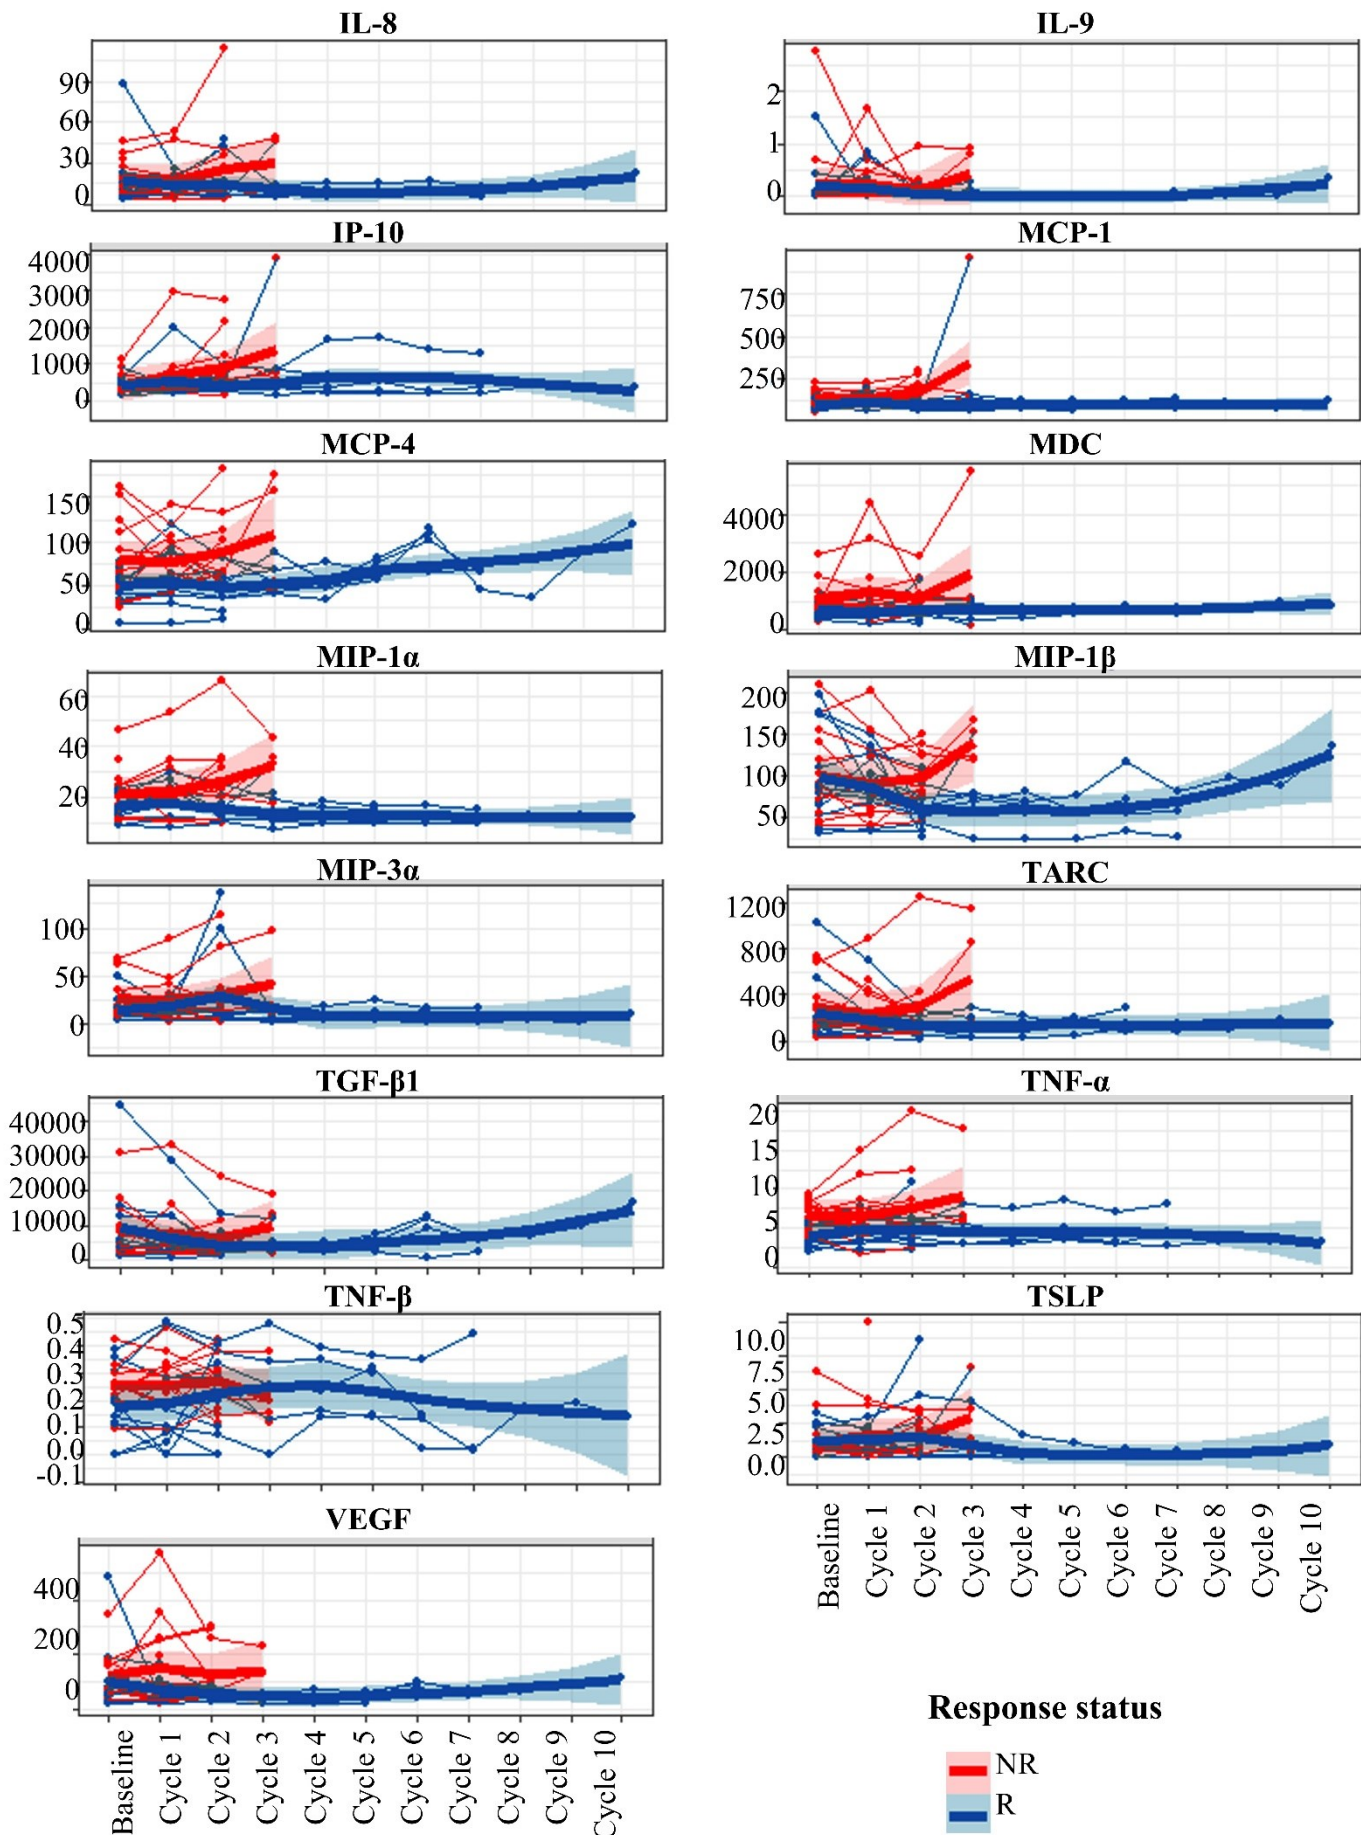

**Figure S21-3. Examples of the longitudinal behavior of cytokines under unstimulated conditions compared between responders and non=responders.** Data in longitudinal analysis are presented as mean values +/- SD.

# Supplementary data

## Cytokine level by MSD

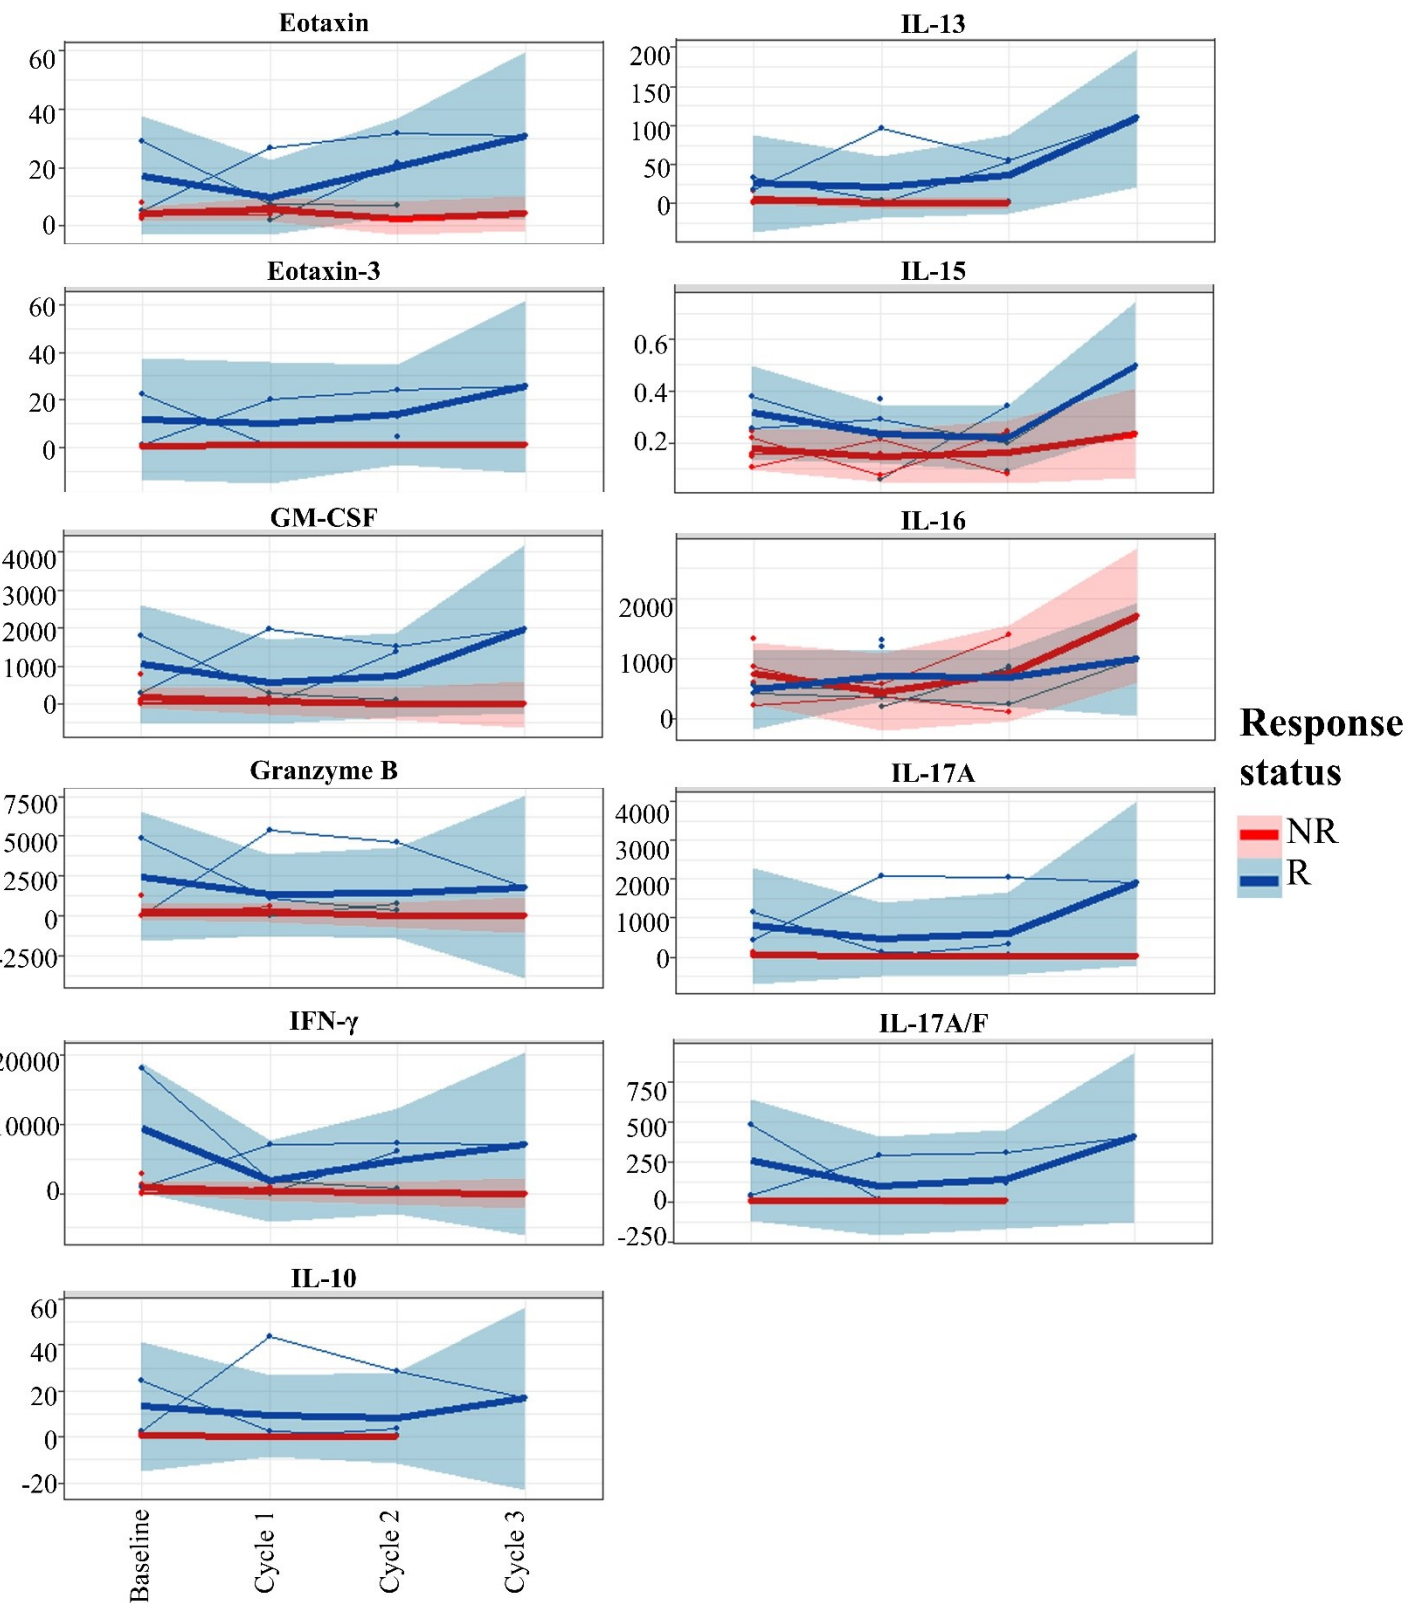

**Supplementary figure 22-1. Comparison of the longitudinal behavior of cytokines after stimulation of T cells within the PBMC population of responders or non-responders.** Data in longitudinal analysis are presented as mean values +/- SD.

# Supplementary data

## Cytokine level by MSD

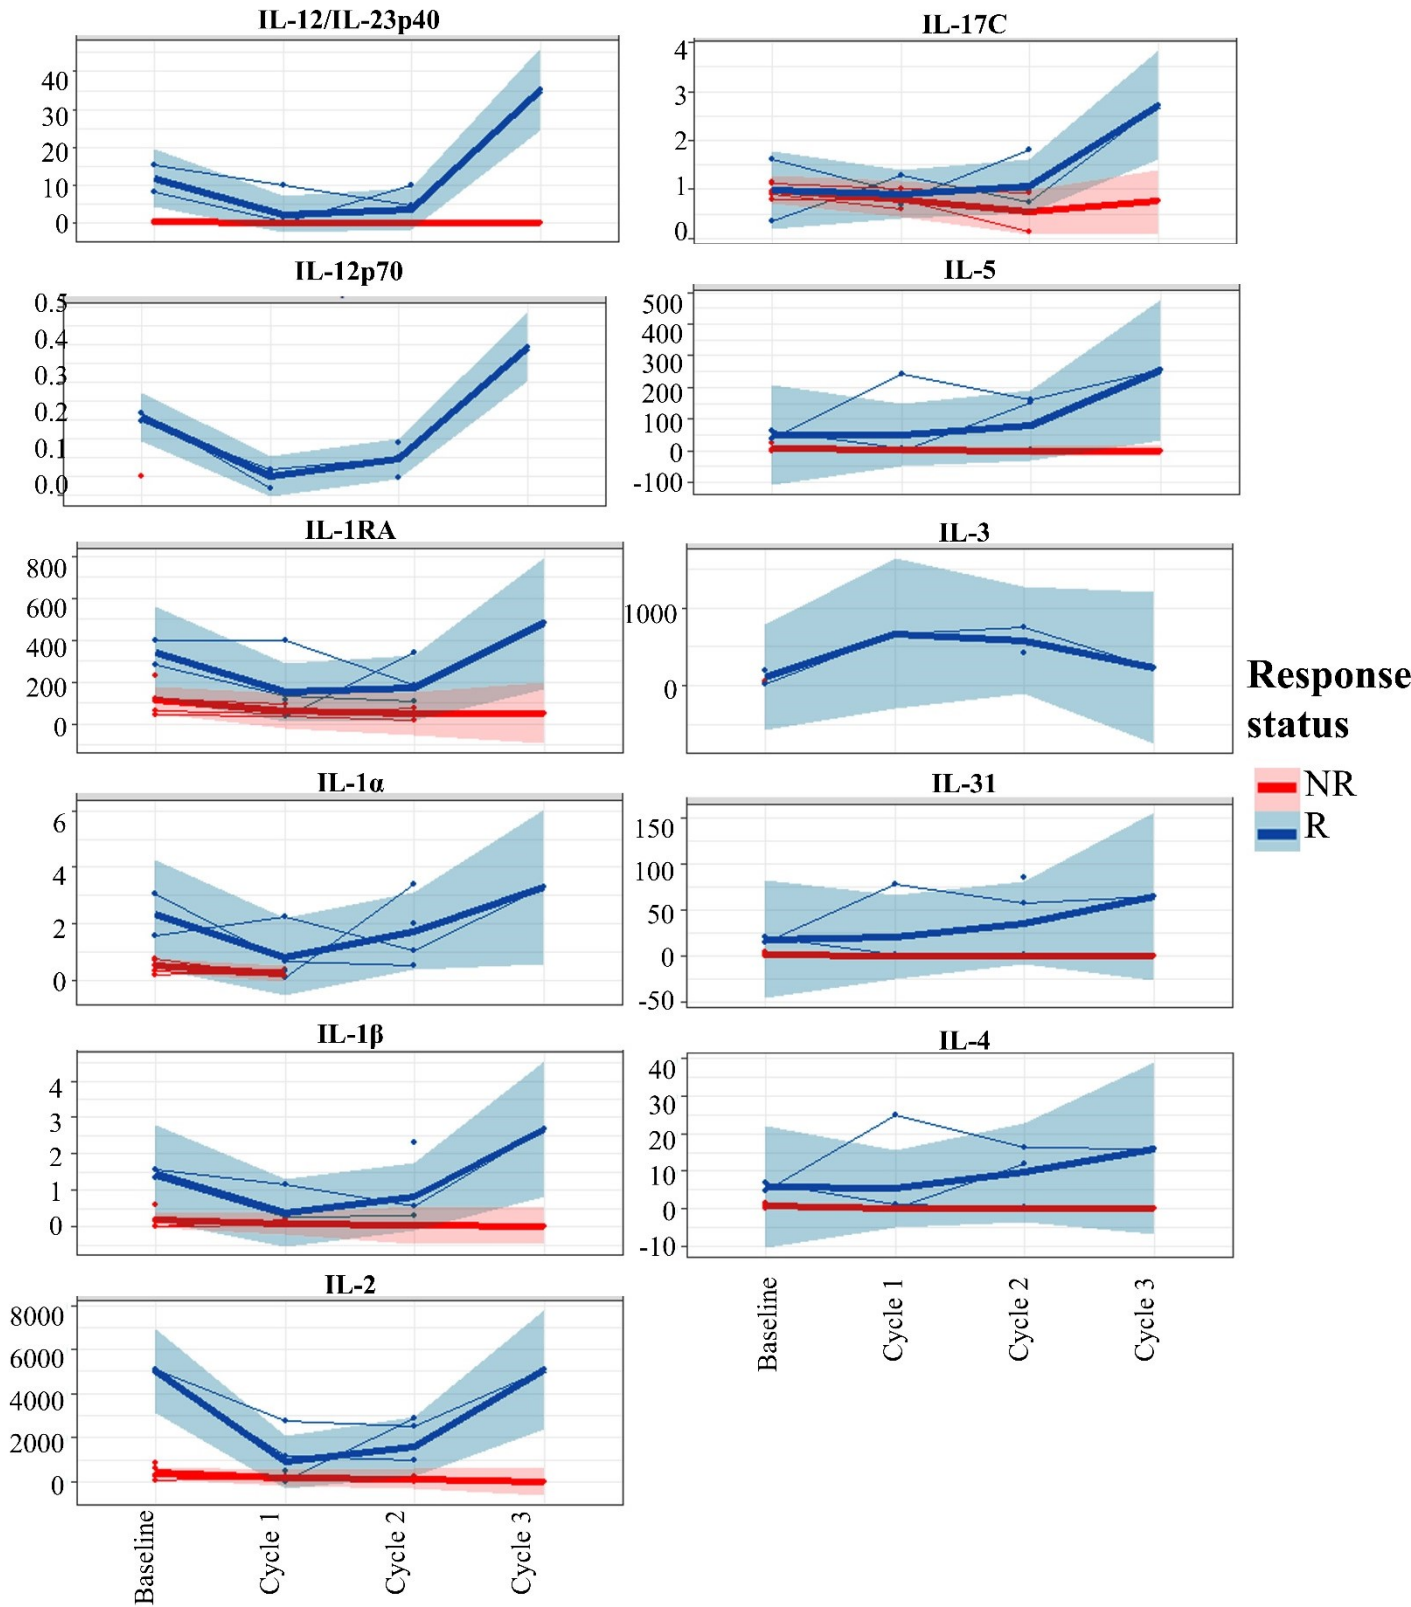

**Supplementary figure 22-2. Comparison of the longitudinal behavior of cytokines after stimulation of T cells within the PBMC population of responders or non-responders.** Data in longitudinal analysis are presented as mean values +/- SD.

# Supplementary data

## Cytokine level by MSD

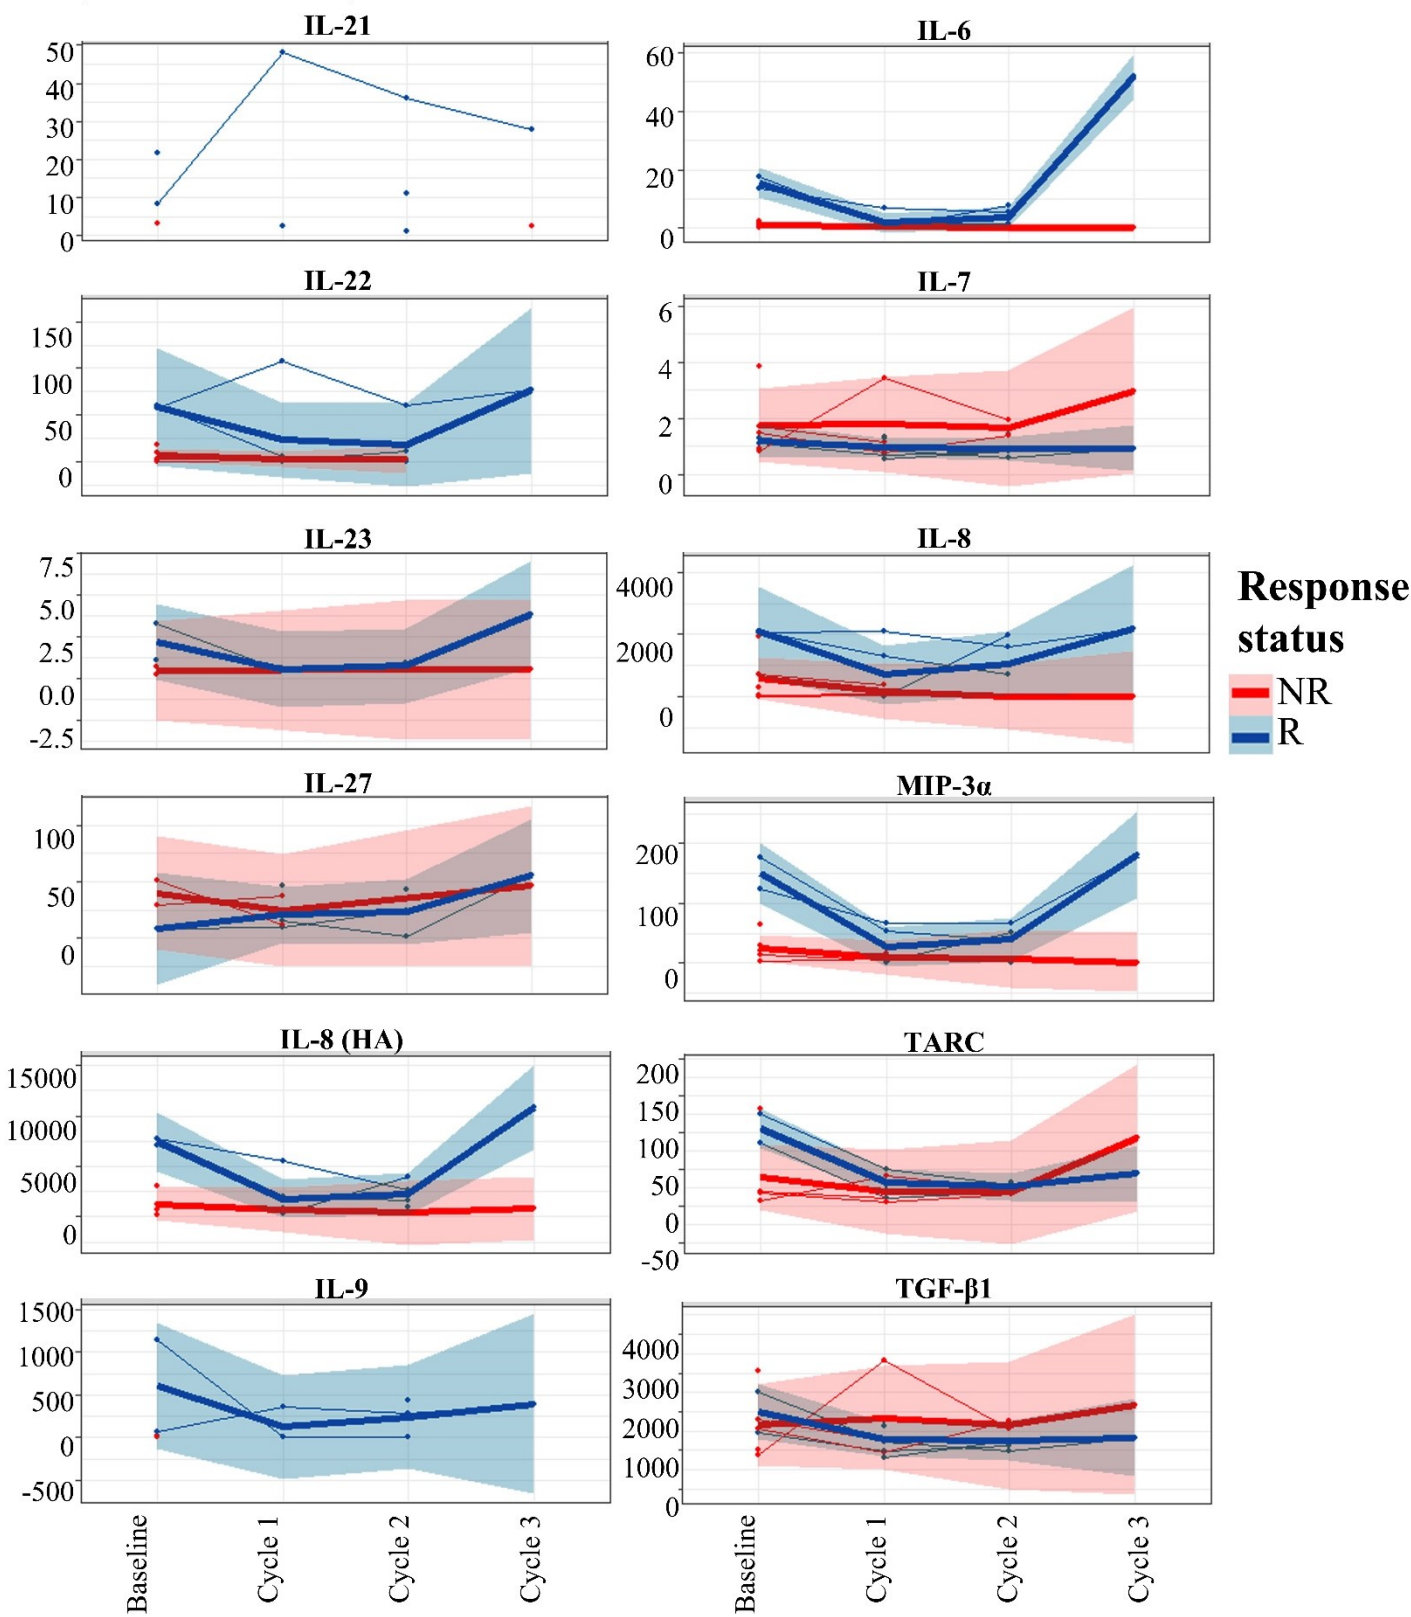

**Supplementary figure 22-3. Comparison of the longitudinal behavior of cytokines after stimulation of T cells within the PBMC population of responders or non-responders.** Data in longitudinal analysis are presented as mean values +/- SD.



# Supplementary data

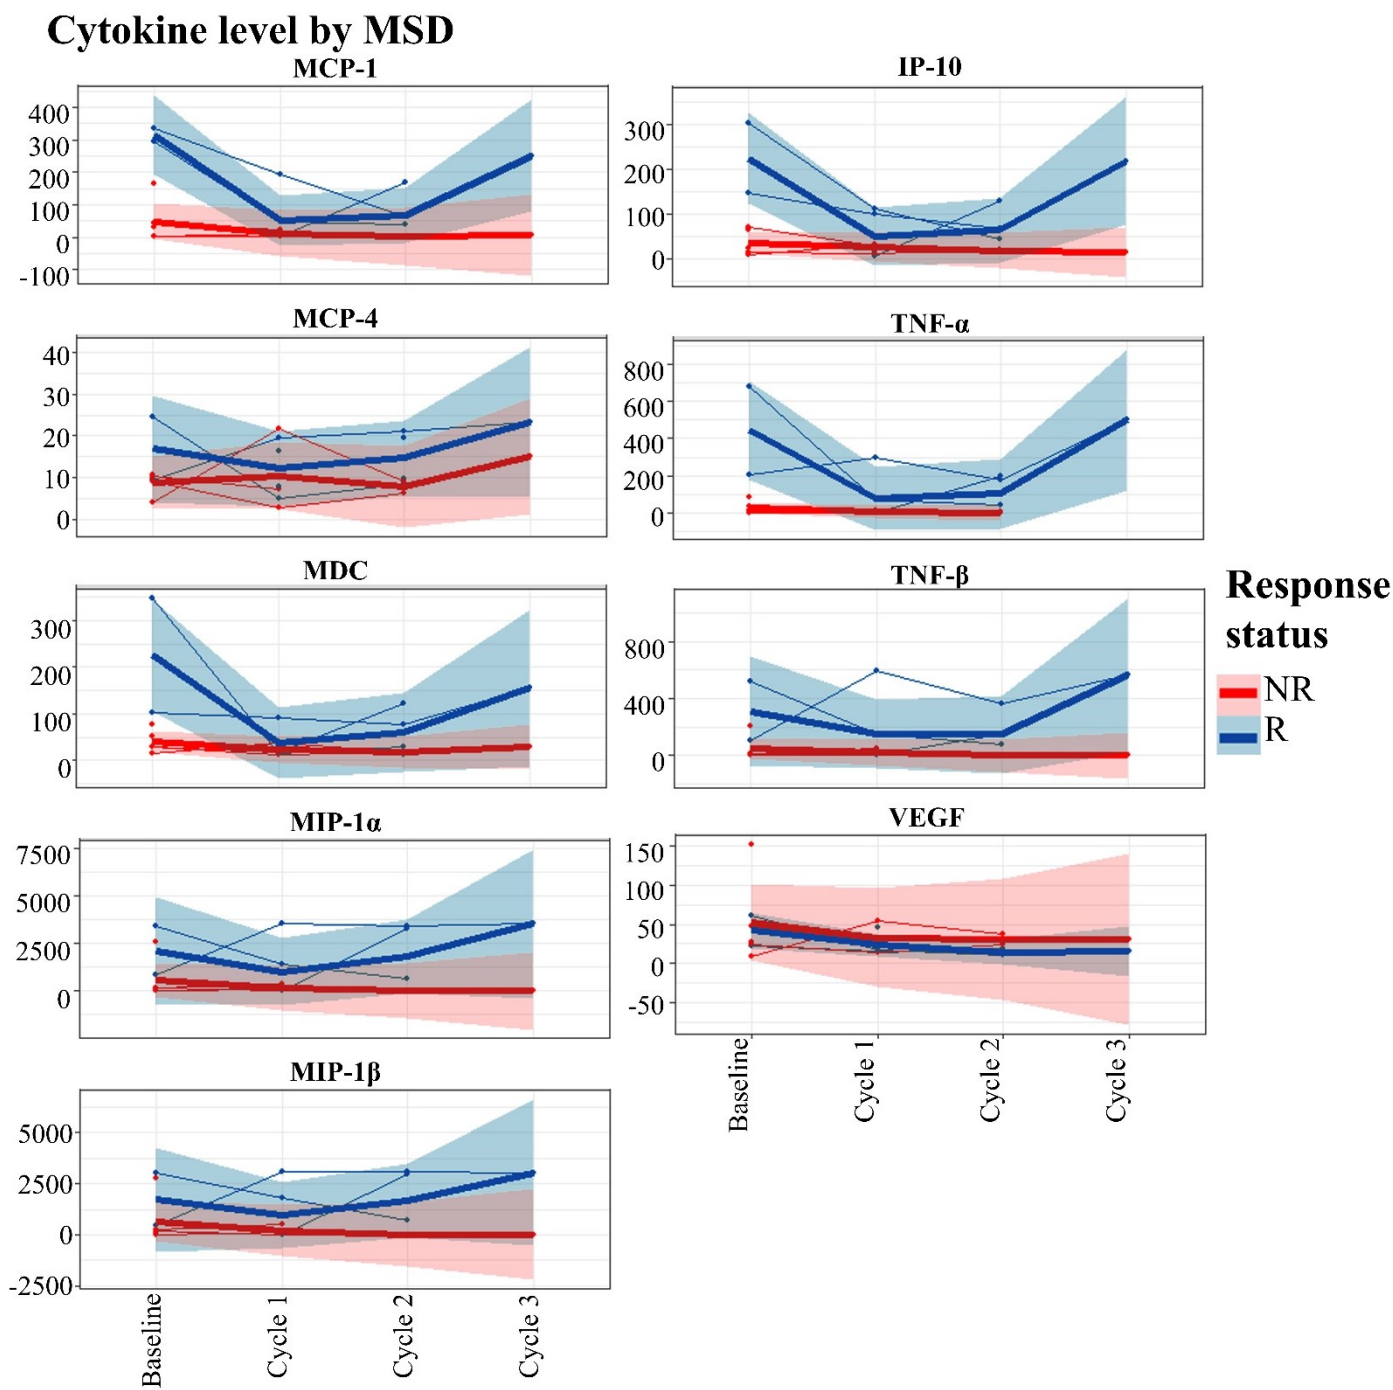

**Supplementary figure 22-4. Comparison of the longitudinal behavior of cytokines after stimulation of T cells within the PBMC population of responders or non-responders.** Data in longitudinal analysis are presented as mean values  $\pm$  SD.

# Supplementary data

| Characteristic                                                              | Patient<br>(N=25)         | Responder<br>(N=11)       | Non-responder<br>(N=14)   |
|-----------------------------------------------------------------------------|---------------------------|---------------------------|---------------------------|
| <b>Sex - no. (%)</b>                                                        |                           |                           |                           |
| Male                                                                        | 19 (76)                   | 10 (91)                   | 9 (64)                    |
| Female                                                                      | 6 (24)                    | 1 (9)                     | 5 (36)                    |
| <b>Age - mean±sd<br/>(min, median, max)</b>                                 | 63.5±12.2<br>(38, 63, 89) | 68.4±11.4<br>(54, 65, 89) | 59.6±11.8<br>(38, 62, 76) |
| <b>Histology - no. (%)</b>                                                  |                           |                           |                           |
| Adenocarcinoma                                                              | 21 (84)                   | 8 (73)                    | 13 (93)                   |
| Squamous carcinoma                                                          | 4 (16)                    | 3 (27)                    | 1 (7)                     |
| <b>Tumor Stage – no. (%)</b>                                                |                           |                           |                           |
| IIIB                                                                        | 1 (4)                     | 1 (9)                     | 0 (0)                     |
| IV                                                                          | 24 (96)                   | 10 (91)                   | 14 (100)                  |
| <b>PDL1 IHC level – no. (%)</b>                                             |                           |                           |                           |
| >49%                                                                        | 13 (52)                   | 6 (55)                    | 7 (50)                    |
| 1%~49%                                                                      | 3 (12)                    | 2 (18)                    | 1 (7)                     |
| <1%                                                                         | 8 (32)                    | 3 (27)                    | 5 (36)                    |
| N/A                                                                         | 1 (4)                     | 0 (0)                     | 1 (7)                     |
| <b>Duration of response (in<br/>month) - mean±sd<br/>(min, median, max)</b> | 6.2±4.5<br>(0, 5, 15)     | 9.4±3.5<br>(4, 10, 15)    | 3.6±3.6<br>(0, 3, 15)     |

**Supplementary table 1. Summary of the clinical evaluation results for all the patients (n=25) after receipt of anti-PD1 treatment.**

# Supplementary data

|                    |               |                    | PDL1 IHC level                    |       |       |        |
|--------------------|---------------|--------------------|-----------------------------------|-------|-------|--------|
|                    |               |                    | >49%                              | 1-49% | <1%   | Total  |
| Response state     | Responder     | Count              | 6                                 | 2     | 3     | 11     |
|                    |               | Expected Count     | 6.0                               | 1.4   | 3.7   | 11.0   |
|                    |               | In response state% | 54.5%                             | 18.2% | 27.3% | 100.0% |
|                    | Non-responder | Count              | 7                                 | 1     | 5     | 13     |
|                    |               | Expected Count     | 7.0                               | 1.6   | 4.3   | 13.0   |
|                    |               | In response state% | 53.8%                             | 7.7%  | 38.5% | 100.0% |
|                    | Total         | Count              | 13                                | 3     | 8     | 24     |
|                    |               | Expected Count     | 13.0                              | 3.0   | 8.0   | 24.0   |
|                    |               | In response state% | 54.2%                             | 12.5% | 33.3% | 100.0% |
|                    |               |                    |                                   |       |       |        |
|                    | Value         | df                 | Asymptotic Significance (2-sided) |       |       |        |
| Pearson Chi-Square | 0.749         | 2                  | 0.688                             |       |       |        |

**Supplementary table 2. Analysis of the relevance and dependency between PD-L1 IHC level and the response statue of immunotherapy.**

# Supplementary data

|                    |               |                    | TMB                               |       |        |
|--------------------|---------------|--------------------|-----------------------------------|-------|--------|
|                    |               |                    | High                              | Low   | Total  |
| Response state     | Responder     | Count              | 1                                 | 7     | 8      |
|                    |               | Expected Count     | 1.1                               | 6.9   | 8.0    |
|                    |               | In response state% | 12.5%                             | 87.5% | 100.0% |
|                    | Non-responder | Count              | 1                                 | 6     | 7      |
|                    |               | Expected Count     | 0.9                               | 6.1   | 7.0    |
|                    |               | In response state% | 14.3%                             | 85.7% | 100.0% |
|                    | Total         | Count              | 2                                 | 13    | 15     |
|                    |               | Expected Count     | 2.0                               | 13.0  | 15.0   |
|                    |               | In response state% | 13.3%                             | 86.7% | 100.0% |
|                    |               |                    |                                   |       |        |
|                    | Value         | df                 | Asymptotic Significance (2-sided) |       |        |
| Pearson Chi-Square | 0.01          | 1                  | 0.919                             |       |        |

**Supplementary table 3. Analysis of the relevance and dependency between TMB and the response statue of immunotherapy.**



# Supplementary data

| Metal      | Antibody   | Clone    | Provider         | Dilution (x-fold) |
|------------|------------|----------|------------------|-------------------|
| Y-89       | CD45       | HI30     | Fluidigm         | 100               |
| Cd-112/114 | CD14       | TUK4     | Invitrogen       | 100               |
| In-115     | CD15       | HI98     | Biolegend        | 100               |
| Ce-140     | Anti-PE    | PE001    | Biolegend        | 100               |
|            | TCRgt-PE   | 5A6.E9   | Invitrogen       | 25                |
| Pr-141     | CD56       | NCAM16.2 | BD               | 100               |
| Nd-142     | CD19       | HIB-19   | Biolegend        | 100               |
| Nd-143     | CD27       | LG.7F9   | Biolegend        | 100               |
| Nd-144     | CD3        | UCHT1    | b1300414         | 100               |
| Nd-145     | CD8        | SK1      | Biolegend        | 100               |
| Nd-146     | HLA-DR     | L243     | Biolegend        | 100               |
| Sm-147     | CD4        | SK3      | Biolegend        | 100               |
| Nd-148     | CD45RO     | UCHL1    | Biolegend        | 50                |
| Sm-149     | ICOS       | C398.4A  | Biolegend        | 50                |
| Nd-150     | Granzyme B | CLB-GB11 | Abcam            | 800               |
| Eu-151     | CD69       | FN50     | Biolegend        | 100               |
| Sm-152     | CD101      | BB27     | eBioscience      | 100               |
| Eu-153     | KLRG1      | 13F2F12  | eBioscience      | 100               |
| Sm-154     | CXCR5      | RF8B2    | BD               | 100               |
| Gd-155     | CD33       | WM53     | Biolegend        | 100               |
| Gd-156     | Tbet       | 4B10     | Biolegend        | 100               |
| Gd-157     | CXCR3      | MAB160   | R&D              | 100               |
| Gd-158     | SAV        | NA       | in-housse        | NA                |
|            | FOXP3-biot | PCH101   | eBioscience      | 100               |
| Tb-159     | PDL1       | 29E.2A3  | Biolegend        | 25                |
| Gd-160     | PD-1       | eBioJ105 | eBioscience      | 50                |
| Dy-161     | TIM-3      | MAB2365  | R&D              | 100               |
| Dy-162     | CD95       | DX2      | Biolegend        | 100               |
| Dy-163     | CD127      | AO19D5   | Biolegend        | 100               |
| Dy-164     | IgG4       | Fc-UNLB  | Southern Biotech | 100               |
| Ho-165     | Ki67       | B56      | BD               | 100               |
| Er-166     | Ox40       | MAB3388  | R&D              | 50                |
| Er-167     | GATA3      | TWAJ     | eBioscience      | 100               |
| Er-168     | CCR7       | MAB197   | R&D              | 50                |
| Tm-169     | CD25       | M-A251   | Biolegend        | 100               |
| Er-170     | CTLA4      | 14D3     | eBioscience      | 25                |
| Yb-171     | CD28       | CD28.2   | Biolegend        | 50                |
| Yb-172     | CD38       | HIT2     | Biolegend        | 100               |
| Yb-173     | CD39       | A1       | Biolegend        | 100               |
| Yb-174     | Eomes      | WD1928   | eBioscience      | 50                |
| Lu-175     | CD11c      | B-Ly6    | BD               | 100               |
| Yb-176     | CD11b      | ICRF44   | Biolegend        | 100               |
| Bi-209     | CD16       | 3g8      | Fluidigm         | 100               |

Supplementary table 4. Composition of the 40-target panel for CyTOF tests.

# Supplementary methods

## 1. Methodological verification

(1) Validation of the CyTOF results by FACS.

Table. The designed FACS panels

| Fluorochrome<br>(MUST Aria III) | Panel 1 (T cell<br>proliferation)   | Panel 2<br>(T cell<br>proliferation,<br>CD38 and PD-1) | Panel 3<br>(MDSC and<br>CD38) | Panel 4<br>(Breg and CD38) | Panel 5<br>(Treg, CD38 and<br>CD101) |
|---------------------------------|-------------------------------------|--------------------------------------------------------|-------------------------------|----------------------------|--------------------------------------|
|                                 | Require intra-<br>cellular staining | Require intra-<br>cellular staining                    | Only surface<br>staining      | Only surface<br>staining   | Only surface<br>staining             |
| FITC                            | Ki-67                               | Ki-67                                                  | CD45                          | CD45                       | CD45                                 |
| PE                              | CD4                                 | CD38                                                   | CD38                          | CD38                       | CD38                                 |
| PerCP                           | CD3                                 | CD3                                                    | CD15                          | CD19                       | CD3                                  |
| PE-Cy5                          |                                     |                                                        |                               |                            |                                      |
| PE-CF594                        | CD8a                                | CD8a                                                   | HLA-DR                        |                            | CD4                                  |
| PE-Cy7                          | CD45                                | CD45                                                   | CD14                          |                            | CD25                                 |
| APC                             | CD45RA                              | PD-1                                                   | CD33                          | CD24                       | CD101                                |
| APC-Cy7                         | Fix/Viable NIR2                     | Fix/Viable NIR2                                        | Fix/Viable NIR2               | Fix/Viable NIR2            | Fix/Viable NIR2                      |

Three PBMC samples from healthy donors were tested by both FACS and CyTOF. The results showed there was no statistical significance between these two methods suggesting the methodology of CyTOF was validated.

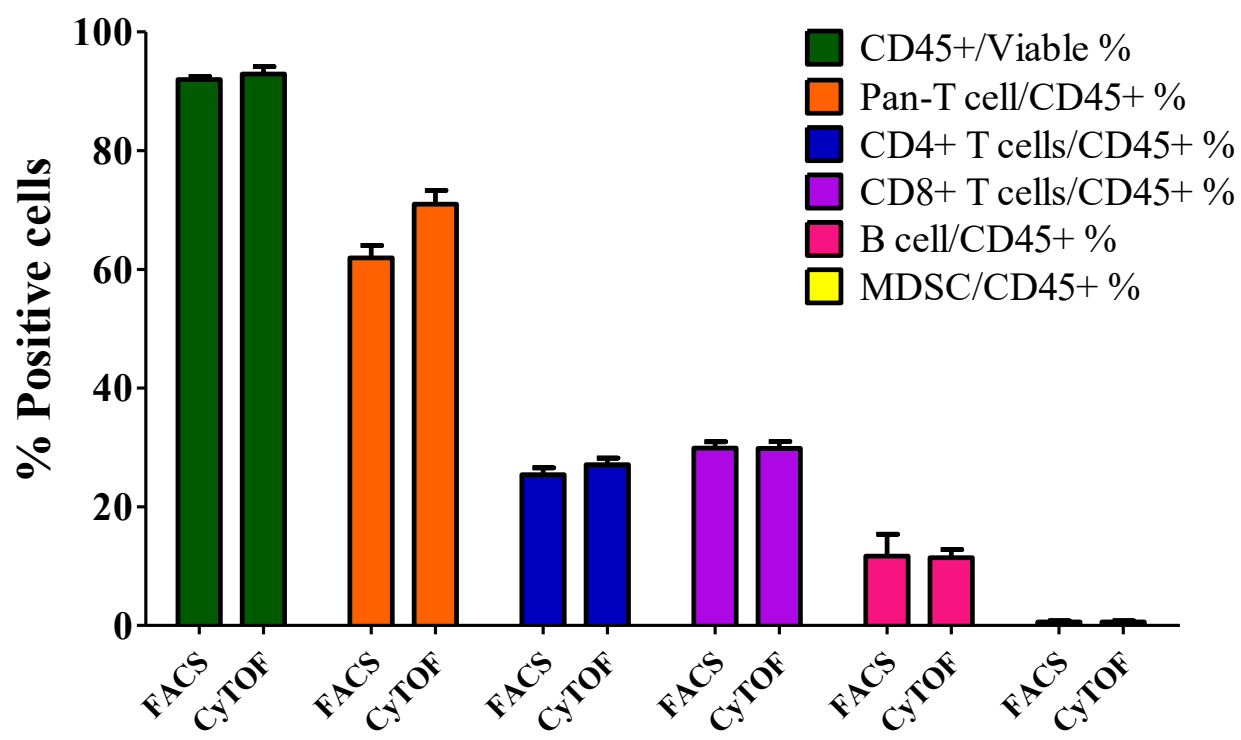

(2) Test of the proportion of viable cells recovered after cryopreservation.

The recovery rates were all over 80% meeting the demanding number of cells required for CyTOF detection

| HD   | Frozen PBMC | Viable PBMC after thawing | Dead cells | Recovery rate |
|------|-------------|---------------------------|------------|---------------|
| HD-1 | 7.50E+06    | 7.30E+06                  | <1E+06     | 97.33%        |
| HD-2 | 7.50E+06    | 6.10E+06                  | <1E+06     | 81.33%        |
| HD-3 | 7.50E+06    | 6.80E+06                  | <1E+06     | 90.67%        |

(3) Test of the influence of time on the results.

A comparative experiment was conducted on the PBMC of healthy people after a long time of storage.

The results showed that there was no significant change in the results after a long time of storage as shown below.

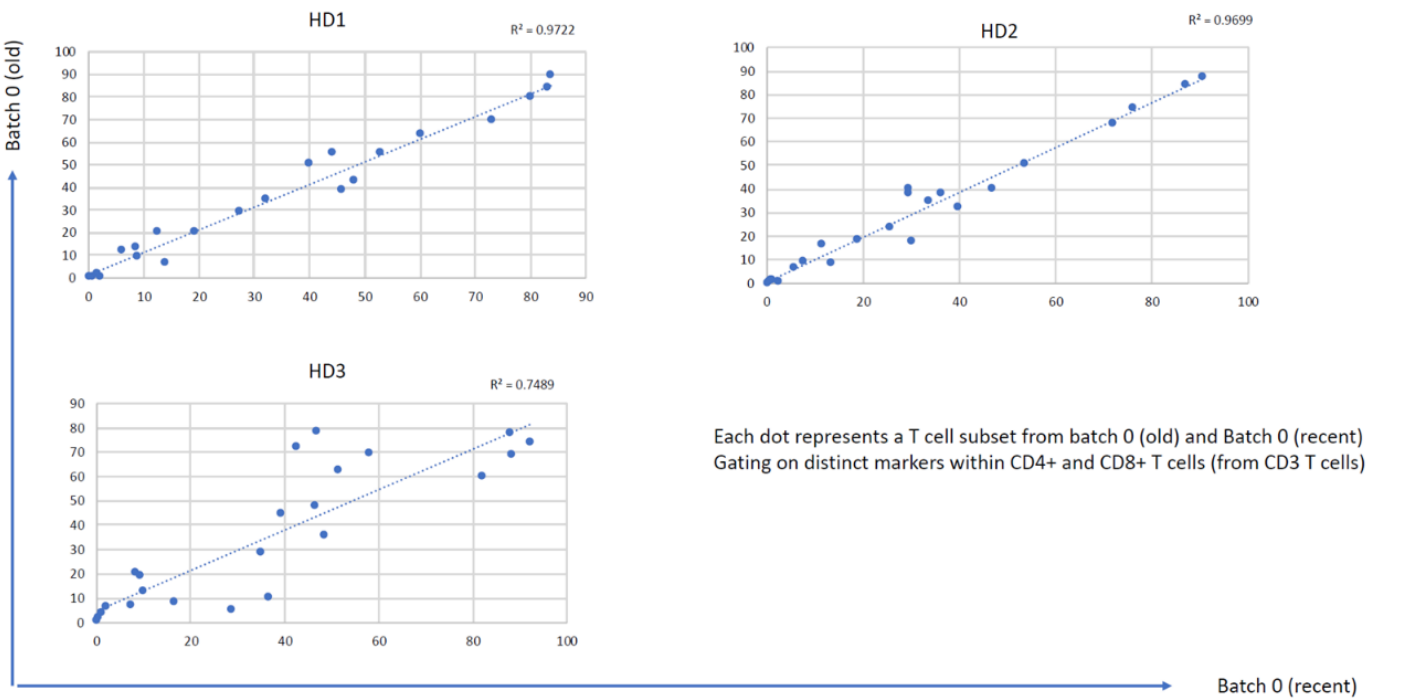

The monitoring test on different batches was also conducted.

The results showed that the frequency of different immune populations from different batches were basically consistent.

## 2. CyTOF QC test:

If the viable cells count of the samples were lower than 1000 or if the sample is the outlier in principle component analysis (PCA) results (as shown below), it means the samples failed the CyTOF QC test and were excluded from further investigations.

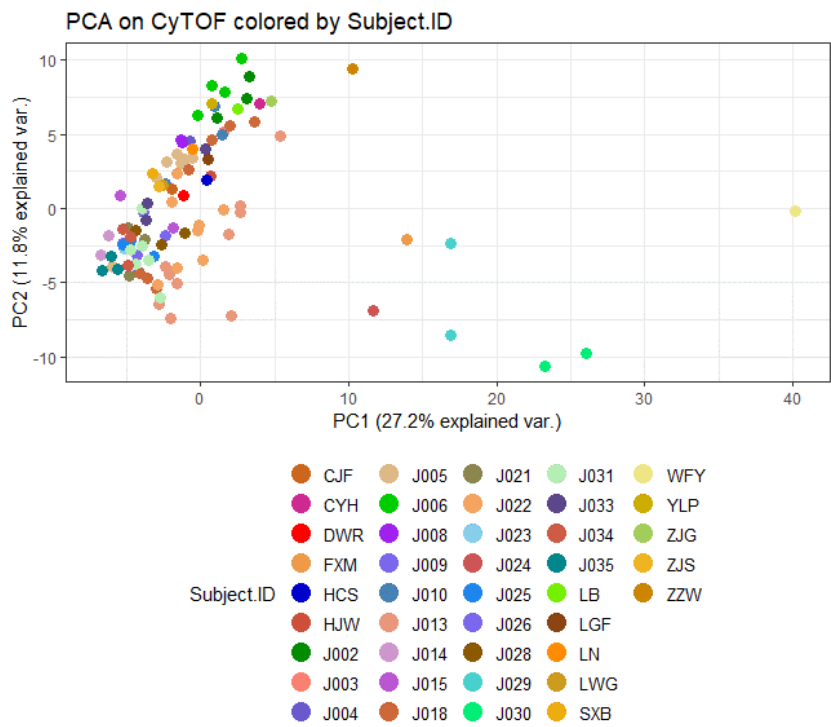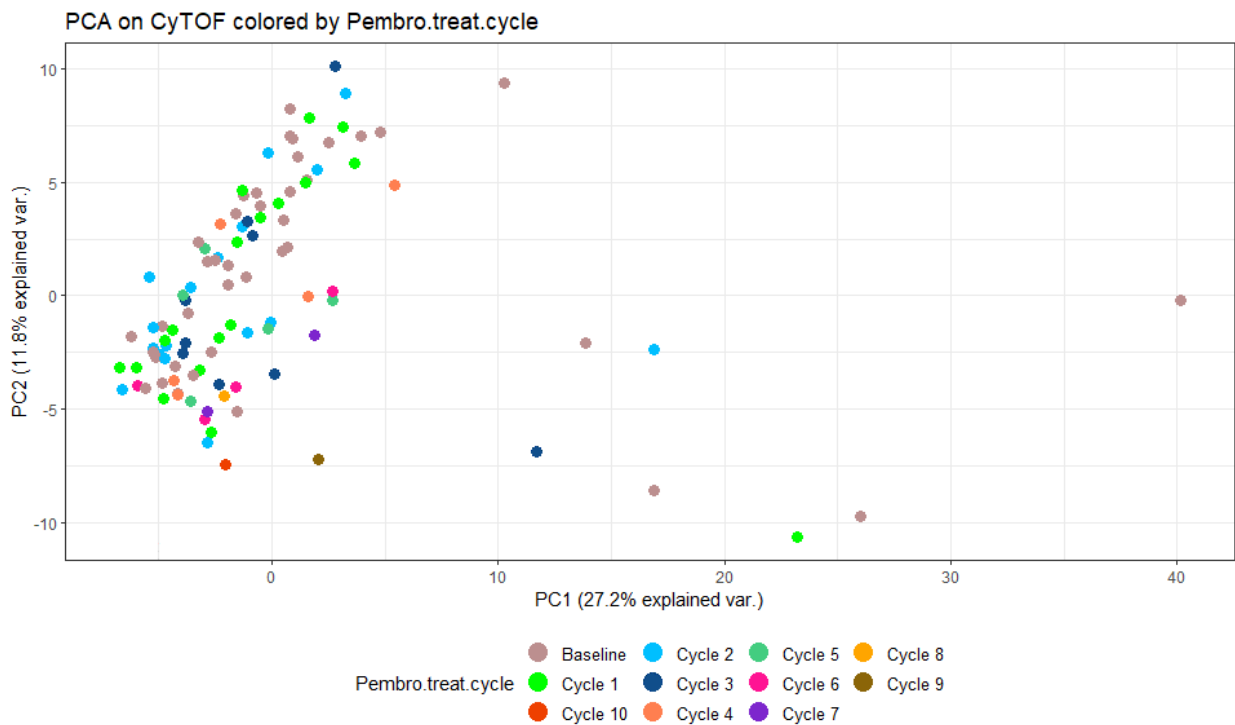



### FACS panel (lymphoid)

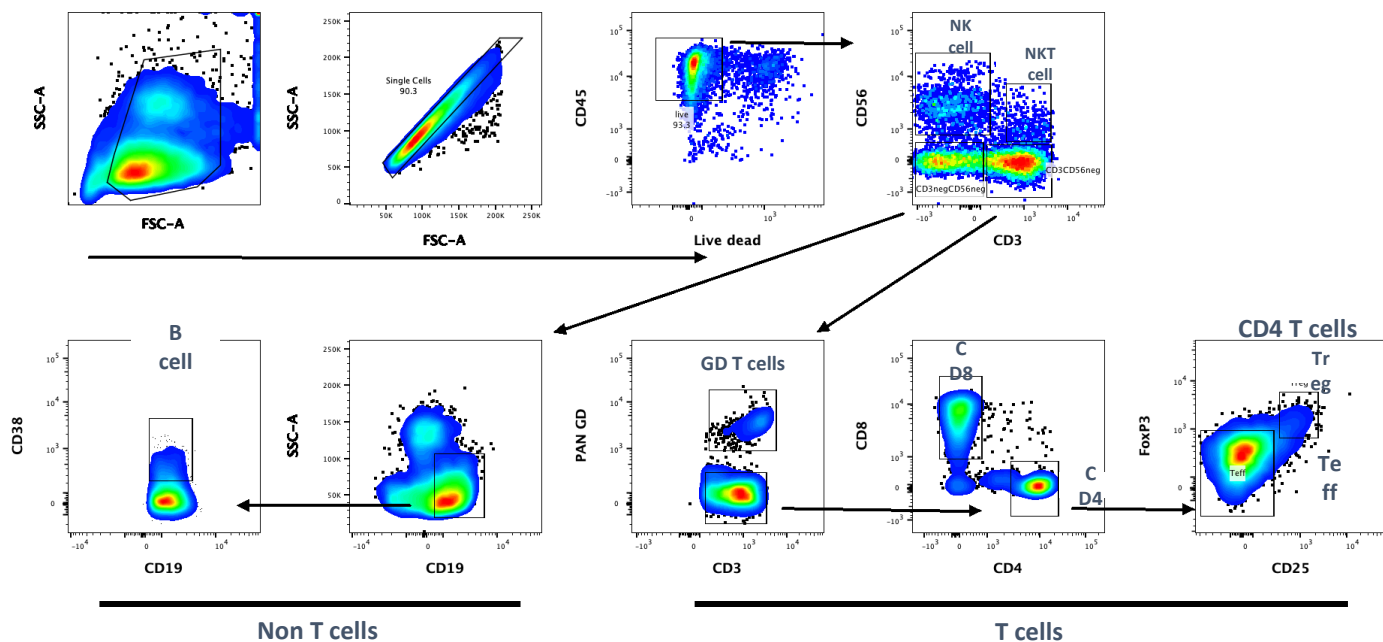

### Represented gating values

**J008A (NR)**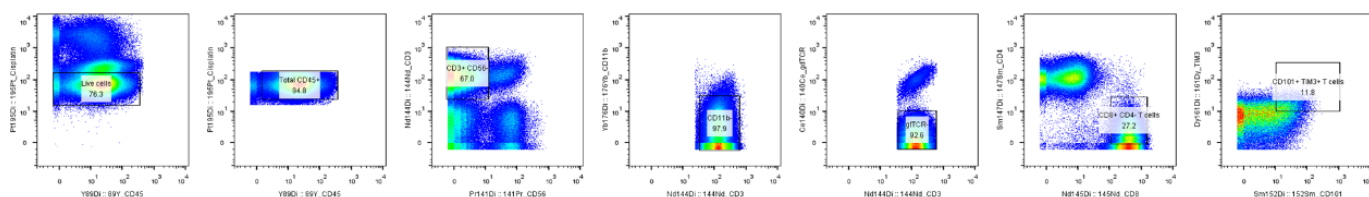

**J0014A (R)**

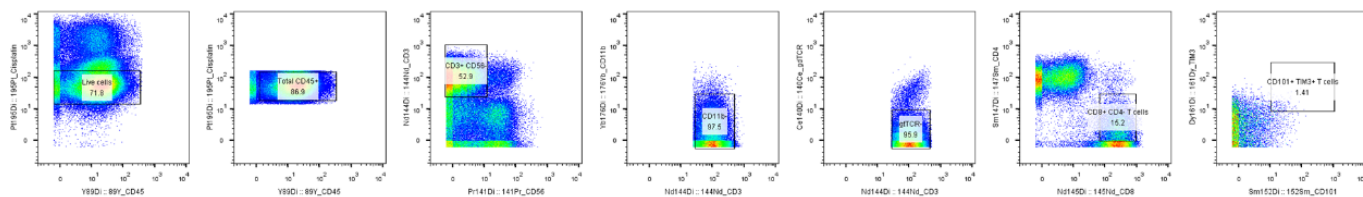

The manual gating strategy was shown below and the cluster CD8<sup>+</sup> CD101<sup>hi</sup> TIM3<sup>+</sup> T cells can be verified by manual gating and there is significant difference between non-responders (n=14) and responders (n=11).
